# Supplementary material for: The zinc finger protein 3 of Arabidopsis thaliana regulates vegetative growth and root hair development
Source: Front Plant Sci. 2024 Jan 5;14:1221519. doi: 10.3389/fpls.2023.1221519 (PMC10796524; doi:10.3389/fpls.2023.1221519)
Supplement: Supplementary file 2 [file Table_1.xlsx]

## Sheet: S1. Arabidopsis lines
Table S1. Arabidopsis lines used in this study
Name	Background	Characteristics
Overexpressing liness
XVE-ZFP1-1	Col-0	Estradiol-inducible ZFP1, pXVE::ZFP1
XVE-ZFP3h1	Col-0	Estradiol-inducible HA-tagged ZFP3, pXVE::ZFP3-HA
XVE-ZFP3h2	Col-0	Estradiol-inducible HA-tagged ZFP3, pXVE::ZFP3-HA
XVE-ZFP4-1	Col-0	Estradiol-inducible ZFP4, pXVE::ZFP4, no tag
XVE-ZFP7-1	Col-0	Estradiol-inducible ZFP7, pXVE::ZFP7, no tag
35S-ZFP3g1	Col-0	Constitutively overexpressing GFP-tagged ZFP3, pCaMV35S:ZFP3-GFP
35S-ZFP3g2	Col-0	Constitutively overexpressing GFP-tagged ZFP3, pCaMV35S:ZFP3-GFP
35S-ZFP3h1	Col-0	Constitutively overexpressing HA-tagged ZFP3, pCaMV35S:ZFP3-HA
35S-ZFP3h2	Col-0	Constitutively overexpressing HA-tagged ZFP3, pCaMV35S:ZFP3-HA
abi4/XVE-ZFP3h1	abi4-104	Estradiol-inducible HA-tagged ZFP3, pXVE::ZFP3-HA
abi5/XVE-ZFP3h1	abi5	Estradiol-inducible HA-tagged ZFP3, pXVE::ZFP3-HA
T-DNA insertion mutants
zfp1	Col-0	T-DNA insertion mutant, SAIL_657_E10
zfp3	Col-0	T-DNA insertion mutant, GK-177E02
zfp4	Col-0	T-DNA insertion mutant, SALK_038923
zfp8	Col-0	T-DNA insertion mutant, SALK_045674
zfp1,zfp3		zfp1 and zfp3 double mutant
zfp1,zfp4		zfp1 and zfp4 double mutant
zfp3,zfp4		zfp3 and zfp4 double mutant
zfp1,zfp3,zfp4		zfp1, zfp3 and zfp4 triple mutant
Silenced lines
zfp1amiR-1	Col-0	Consitutively silenced ZFP1, CaMV35S::ZFP1amiR, artificial miRNA line
zfp3amiR-1	Col-0	Consitutively silenced ZFP3, CaMV35S::ZFP3amiR, artificial miRNA line
zfp3amiR-2	Col-0	Consitutively silenced ZFP3, CaMV35S::ZFP3amiR, artificial miRNA line
zfp3amiR-3	Col-0	Consitutively silenced ZFP3, CaMV35S::ZFP3amiR, artificial miRNA line
zfp4amiR-1	Col-0	Consitutively silenced ZFP4, CaMV35S::ZFP4amiR, artificial miRNA line
zfp7amiR-1	Col-0	Consitutively silenced ZFP7, CaMV35S::ZFP7amiR, artificial miRNA line
zfp1+3amiR	Col-0	Silenced ZFP1 and ZFP3, CaMV35S::ZFP1amiR, CaMV35S::ZFP3amiR artificial miRNA line
zfp1+4amiR	Col-0	Silenced ZFP1 and ZFP4, CaMV35S::ZFP1amiR, CaMV35S::ZFP4amiR artificial miRNA line
zfp4+7amiR	Col-0	Silenced ZFP4 and ZFP7, CaMV35S::ZFP4amiR, CaMV35S::ZFP7amiR artificial miRNA line
Reporter line
pZFP3-GUS	Col-0	ZFP3 promoter fused to GUS reporter gene

## Sheet: S2. RNAseq summary
Table S2. Summary of RNAseq transcript profiling with ZFP3 overexpressing plants
All genes:	38681
Expressed:	22245
Genes which are up or downregulated at least 2,5 times
	Short Estr. / up	Short Estr. / down	Long Estr. / up	Long Estr. / down
Short Estr. / up	571		176
Short Estr. / down		641		113
Long Estr. / up			421
Long Estr. / down				308
Categories
Treatments	repressed genes	induced genes	repressed %	induced %	All	all %	respressed%	induced%
All	836	816	50.6053	49.3947	1652	7.42639	3.75815	3.66824
Short Estr.	641	570	38.8015	34.5036	1211	5.44392	2.88155	2.56237
Long Estr.	308	421	18.6441	25.4843	729	3.27714	1.38458	1.89256
Short and Long Estr.	113	176	6.84019	10.6538			0.507979	0.791189
Short Estr. only	528	394	31.9613	23.8499			2.37357	1.77118
Long Estr. only	195	245	11.8039	14.8305			0.876601	1.10137
TAIR GO Term Enrichment for Plants
https://www.arabidopsis.org/tools/go_term_enrichment.jsp

## Sheet: S3. ZFP3-repressed, short E.
Table S3. Genes with decreased expression (at least 2.5x) in ZFP3 overexpressing plants treated with estradiol for 6 hours (Short treatment).
Fold change/Short	Fold change/Long	AGI	Protein	Gene Symbols	Gene Model Description
0	0.818182	AT1G01453			late embryogenesis abundant hydroxyproline-rich glycoprotein family protein;(source:Araport11)
0	0.451456	AT2G47530			Pollen Ole e 1 allergen and extensin family protein;(source:Araport11)
0	0.342466	AT5G41730			Protein kinase family protein;(source:Araport11)
0	0.656716	AT5G40860			transmembrane protein;(source:Araport11)
0	0	AT2G03740	LEA11	LATE EMBRYOGENESIS ABUNDANT 11 (LEA11)	Late embryogenesis abundant protein. Associates with and stabilizes membranes as part of cryoprotective response.
0	0.418182	AT1G69240	MES15	ROOT HAIR SPECIFIC 9 (RHS9);METHYL ESTERASE 15 (MES15);ARABIDOPSIS THALIANA METHYL ESTERASE 15 (ATMES15)	Encodes a protein predicted to act as a carboxylesterase. It has similarity to the SABP2 methyl salicylate esterase from tobacco but no enzymatic activity has been identified for this protein.
0	0.792208	AT5G54050			Cysteine/Histidine-rich C1 domain family protein;(source:Araport11)
0	0.538462	AT1G27740	RSL4	ROOT HAIR DEFECTIVE 6-LIKE 4 (RSL4)	Basic helix-loop-helix (bHLH) transcription factor that is sufficient to promote postmitotic cell growth in root-hair cells. RSL4 is a direct transcriptional target of RHD6
0	0.331081	AT5G23030	TET12	TETRASPANIN12 (TET12)	Member of TETRASPANIN family
0	1.02128	AT2G46860	PPa3	PYROPHOSPHORYLASE 3 (PPa3);PYROPHOSPHORYLASE 3 (AtPPa3)	Encodes a protein that might have inorganic pyrophosphatase activity.
0	1.26667	AT1G59725			DNAJ heat shock family protein;(source:Araport11)
0	0.146341	AT4G26380	C1 domain family		Cysteine/Histidine-rich C1 domain family protein;(source:Araport11)
0	0.282609	AT5G11180	GLR2.6	GLUTAMATE RECEPTOR 2.6 (GLR2.6);ARABIDOPSIS THALIANA GLUTAMATE RECEPTOR 2.6 (ATGLR2.6)	member of Putative ligand-gated ion channel subunit family
0	1.1	AT2G27440			pseudogene of rac GTPase activating protein
0	0.785047	AT1G79860	ROPGEF12	(ATROPGEF12);MATERNAL EFFECT EMBRYO ARREST 64 (MEE64);ROP (RHO OF PLANTS) GUANINE NUCLEOTIDE EXCHANGE FACTOR 12 (ROPGEF12)	Encodes a member of KPP-like gene family, homolog of KPP (kinase partner protein) gene in tomato. Also a member of the RopGEF (guanine nucleotide exchange factor) family, containing the novel PRONE domain (plant-specific Rop nucleotide exchanger), which is exclusively active towards members of the Rop subfamily. Coexpression of AtPRK2a with AtRopGEF12 resulted in isotropic pollen tube growth Grow…
0	0.673077	AT5G53190	SWEET3	(AtSWEET3); (SWEET3)	Nodulin MtN3 family protein;(source:Araport11)
0	1.04	AT1G73580		C2-DOMAIN ABA-RELATED3 (CAR3)	Calcium-dependent lipid-binding (CaLB domain) family protein;(source:Araport11)
0	0.475	AT1G26360		METHYL ESTERASE 13 (MES13);ARABIDOPSIS THALIANA METHYL ESTERASE 13 (ATMES13)	Encodes a protein predicted to act as a carboxylesterase. It has similarity to the SABP2 methyl salicylate esterase from tobacco but no enzymatic activity has been identified for this protein.
0	0.384211	AT3G12540	MIP1 leucine-zipper protein		ternary complex factor MIP1 leucine-zipper protein (Protein of unknown function, DUF547);(source:Araport11)
0	0.5	AT4G22080	RHS14	ROOT HAIR SPECIFIC 14 (RHS14)	root hair specific 14;(source:Araport11)
0	0.692308	AT5G56880			hypothetical protein;(source:Araport11)
0	0.0416667	AT1G11920	Pectin lyase-like		Pectin lyase-like superfamily protein;(source:Araport11)
0	0.621777	AT5G22410	RHS18,PER60	ROOT HAIR SPECIFIC 18 (RHS18)	root hair specific 18;(source:Araport11)
0	0.6	AT2G20520	FLA6	FASCICLIN-LIKE ARABINOGALACTAN 6 (FLA6)	fasciclin-like arabinogalactan-protein 6 (Fla6). Possibly involved in embryogenesis and seed development.
0	1.07407	AT1G05990	RHS2	ROOT HAIR SPECIFIC 1 (RHS1);CALMODULIN LIKE 7 (CML7);ROOT HAIR SPECIFIC 2 (RHS2); (RHS1)	EF hand calcium-binding protein family;(source:Araport11)
0	0.136364	AT2G32620	CSLB02	CELLULOSE SYNTHASE-LIKE B (ATCSLB02);CELLULOSE SYNTHASE-LIKE B (CSLB02);CELLULOSE SYNTHASE LIKE B2 (ATCSLB2);CELLULOSE SYNTHASE LIKE B2 (CSLB02)	encodes a gene similar to cellulose synthase
0	0	AT1G04707	unknown		Natural antisense transcript overlaps with AT1G09610;(source:Araport11)
0	0.366109	AT1G54970	RHS7, PRP1	PROLINE-RICH PROTEIN 1 (PRP1);ROOT HAIR SPECIFIC 7 (RHS7);PROLINE-RICH PROTEIN 1 (ATPRP1)	encodes a proline-rich protein that is specifically expressed in the root. The mRNA is cell-to-cell mobile.
0	0.465116	AT1G23110			fold protein;(source:Araport11)
0	0.673913	AT3G07490		ARF-GAP DOMAIN 11 (AGD11); (ATCML3);CALMODULIN-LIKE 3 (CML3)	A member of ARF GAP domain (AGD), A thaliana has 15 members, grouped into four classes.
0	1.23077	AT5G26080			proline-rich family protein;(source:Araport11)
0	1.42105	AT4G37950			Rhamnogalacturonate lyase family protein;(source:Araport11)
0	0.216216	AT2G18640	GGPS4	GERANYLGERANYL PYROPHOSPHATE SYNTHASE 4 (GGPS4);ISOPRENYL DIPHOSPHATE SYNTHASE3 (IDS3);GERANYLGERANYL PYROPHOSPHATE SYNTHASE 3 (GGPPS3)	Encodes an endoplasmic reticulum-targeted geranylgeranyl pyrophosphate synthase
0	0.75	AT5G35380			kinase with adenine nucleotide alpha hydrolases-like domain-containing protein;(source:Araport11)
0	0.561798	AT1G55290	F6'H2	(F6'H2)	encodes a protein whose sequence is similar to oxidoreductase, 2OG-Fe(II) oxygenase
0	0.607143	AT1G34540	CYP94D1	CYTOCHROME P450, FAMILY 94, SUBFAMILY D, POLYPEPTIDE 1 (CYP94D1)	member of CYP94D
0	1.21764	AT4G16515	RGF6	GOLVEN 1 (GLV1);CLE-LIKE 6 (CLEL 6);ROOT MERISTEM GROWTH FACTOR 6 (RGF6)	Encodes a root meristem growth factor (RGF). Belongs to a family of functionally redundant homologous peptides that are secreted, tyrosine-sulfated, and expressed mainly in the stem cell area and the innermost layer of central columella cells. RGFs are required for maintenance of the root stem cell niche and transit amplifying cell proliferation. Members of this family include: At5g60810 (RGF1), …
0	1.60086	AT1G20070			hypothetical protein;(source:Araport11)
0.00732601	0.582418	AT5G57540	XTH13	(AtXTH13);XYLOGLUCAN ENDOTRANSGLUCOSYLASE/HYDROLASE 13 (XTH13)	Encodes a xyloglucan endotransglucosylase/hydrolase with only only the endotransglucosylase (XET; EC 2.4.1.207) activity towards xyloglucan and non-detectable endohydrolytic (XEH; EC 3.2.1.151) activity.
0.00892061	0.468332	AT5G35190	EXT13	EXTENSIN 13 (EXT13)	proline-rich extensin-like family protein;(source:Araport11)
0.00918133	0.39671	AT3G62680	PRP3	ARABIDOPSIS THALIANA PROLINE-RICH PROTEIN 3 (ATPRP3);PROLINE-RICH PROTEIN 3 (PRP3)	Proline-rich protein The mRNA is cell-to-cell mobile.
0.00929368	0.479554	AT4G08410	EXT8	EXTENSIN 8 (EXT8)	Proline-rich extensin-like family protein;(source:Araport11)
0.00942873	1.37493	AT5G61650	CYCP4;2	(CYCP4);CYCLIN P4;2 (CYCP4;2)	The P-type cyclins (CYCPs) share a conserved central region of 100 amino acids ('cyclin box') displaying homology to the corresponding region of the PHO80 cyclin from Saccharomyces cerevisiae and the related G1 cyclins from Trypanosoma cruzi and T. brucei.
0.0105003	0.313774	AT5G15180	PRX56	PEROXIDASE 56 (PRX56)	Peroxidase superfamily protein;(source:Araport11)
0.0107527	0.520039	AT5G49080	EXT11	EXTENSIN 11 (EXT11)	transposable_element_gene;(source:Araport11);similar to proline-rich extensin-like family protein [Arabidopsis thaliana] (TAIR:AT5G06640.1);(source:TAIR10)
0.011811	0.634843	AT5G04960	PME46	PECTIN METHYLESTERASE46 (PME46)	Encodes a protein that modulates the activity of pectin methylesterase within the cell wall.
0.0131926	0.335092	AT5G15290	CASP5	CASPARIAN STRIP MEMBRANE DOMAIN PROTEIN 5 (CASP5)	Uncharacterized protein family (UPF0497);(source:Araport11)
0.0157895	0.505263	AT1G16440	RHS3	ROOT HAIR SPECIFIC 4 (RHS4);AGC VIIIA KINASE 1-6 (AGC1-6);ROOT HAIR SPECIFIC 3 (RSH3)	Member of AGC VIIIa Kinase gene family. Invovled in the maintenance of (p)ppGpp level to accustom plastidial gene expression to darkness.
0.0184109	0.425388	AT1G62980	EXPA18	EXPANSIN A18 (ATEXPA18);EXPANSIN 18 (EXP18);EXPANSIN A18 (EXPA18); (ATHEXP ALPHA 1.25); (ATEXP18)	Alpha-expansin 18. Naming convention from the Expansin Working Group (Kende et al, 2004. Plant Mol Bio)
0.0192308	0.490385	AT1G02570			transmembrane protein;(source:Araport11)
0.0193548	0.277419	AT1G54940	PGSIP4,GUX4	GLUCURONIC ACID SUBSTITUTION OF XYLAN 4 (GUX4);PLANT GLYCOGENIN-LIKE STARCH INITIATION PROTEIN 4 (PGSIP4)	Encodes a xylan glucuronosyltransferase.
0.0200803	0.566265	AT5G57530	XTH12	(AtXTH12);XYLOGLUCAN ENDOTRANSGLUCOSYLASE/HYDROLASE 12 (XTH12)	xyloglucan endotransglucosylase/hydrolase 12;(source:Araport11)
0.0201493	0.309701	AT4G13390	EXT12	EXTENSIN 12 (EXT12)	Proline-rich extensin-like family protein;(source:Araport11)
0.0215054	0.784946	AT1G30850	RSH4	ROOT HAIR SPECIFIC 4 (RSH4)	root hair specific 4;(source:Araport11)
0.0217654	0.749698	AT3G49960	PER35		Its expression is enriched in root hair cells (compared to non-root hair cells) and this enrichment is associated with increase in the transcription-associated mark trimethylation of H3 lysine 4 (H3K4me3) and decrease in the Polycomb silencing-associated mark trimethylation of H3 lysine 27 (H3K27me3) in root hair cells relative to non-root hair cells.
0.0225806	0.5	AT5G57625	CAPE5	(ATCAPE5)	CAP (Cysteine-rich secretory proteins, Antigen 5, and Pathogenesis-related 1 protein) superfamily protein;(source:Araport11)
0.0226586	0.519637	AT4G08400	EXT7	EXTENSIN 7 (EXT7)	Proline-rich extensin-like family protein;(source:Araport11)
0.0229358	0.4763	AT2G24980	EXT6	EXTENSIN 6 (EXT6)	Proline-rich extensin-like family protein;(source:Araport11)
0.0233463	0.898833	AT4G28850	XTH26	(ATXTH26);XYLOGLUCAN ENDOTRANSGLUCOSYLASE/HYDROLASE 26 (XTH26)	xyloglucan endotransglucosylase/hydrolase 26;(source:Araport11)
0.0235383	0.476082	AT5G06640	EXT10	EXTENSIN 10 (EXT10)	Proline-rich extensin-like family protein;(source:Araport11)
0.025	0.75	AT3G15700			P-loop containing nucleoside triphosphate hydrolases superfamily protein;(source:Araport11)
0.026576	0.410383	AT1G12040	LRX1	LEUCINE-RICH REPEAT/EXTENSIN 1 (LRX1)	encodes a a chimeric leucine-rich repeat/extensin protein that regulates root hair morphogenesis and elongation. Null mutants develop root hairs that frequently abort, swell, or branch. Gene is expressed in root hair cells and protein is specifically localized in the wall of the hair proper. The mRNA is cell-to-cell mobile.
0.0278008	0.583402	AT4G25820	XTH14	XYLOGLUCAN ENDOTRANSGLYCOSYLASE 9 (XTR9); (ATXTH14);XYLOGLUCAN ENDOTRANSGLUCOSYLASE/HYDROLASE 14 (XTH14)	Encodes a xyloglucan endotransglycosylase with a clear preference for non-fucosylated xyloglucan polymer. The mRNA is cell-to-cell mobile.
0.0281124	0.493976	AT1G52660			P-loop containing nucleoside triphosphate hydrolases superfamily protein;(source:Araport11)
0.0288221	0.501253	AT5G06630	EXT9	EXTENSIN 9 (EXT9)	proline-rich extensin-like family protein;(source:Araport11)
0.0297561	0.519512	AT5G67400	RHS19,PER73	ROOT HAIR SPECIFIC 19 (RHS19)	root hair specific 19;(source:Araport11)
0.0305206	0.369838	AT3G10710	RHS12	ROOT HAIR SPECIFIC 12 (RHS12)	root hair specific 12;(source:Araport11)
0.0313725	0.67451	AT5G42510			Disease resistance-responsive (dirigent-like protein) family protein;(source:Araport11)
0.0332226	0.401993	AT1G30870	PER7	PEROXIDASE7 (PER7)	Peroxidase superfamily protein;(source:Araport11)
0.0338983	0.494915	AT4G25220		GLYCEROL-3-PHOSPHATE PERMEASE 2 (G3Pp2);GLYCEROL-3-PHOSPHATE PERMEASE 2 (AtG3Pp2);ROOT HAIR SPECIFIC 15 (RHS15)	Encodes a member of the phosphate starvation-induced glycerol-3-phosphate permease gene family: AT3G47420(G3Pp1), AT4G25220(G3Pp2), AT1G30560(G3Pp3), AT4G17550(G3Pp4) and AT2G13100(G3Pp5).
0.0363636	0.577033	AT1G12560	EXPA7	EXPANSIN A7 (ATEXPA7); (EXP7);EXPANSIN A7 (EXPA7); (ATHEXP ALPHA 1.26); (ATEXP7)	Member of Alpha-Expansin Gene Family. Naming convention from the Expansin Working Group (Kende et al, 2004. Plant Mol Bio). Containing a conserved root hair-specific cis-element RHE. Expressed specifically in root hair cell and involved in root hair elongation.
0.037037	0.814815	AT1G08187			novel transcribed region; detected in root, carpel, root apical meristem, receptacle, leaf, dark-grown seedling;(source:Araport11)
0.037037	0.42963	AT2G32610	CSLB1	CELLULOSE SYNTHASE-LIKE B1 (ATCSLB01);CELLULOSE SYNTHASE-LIKE B1 (CSLB01);CELLULOSE SYNTHASE LIKE B1 (ATCSLB1);CELLULOSE SYNTHASE LIKE B1 (CSLB01)	encodes a gene similar to cellulose synthase
0.0377358	0.622642	AT3G27095			pseudogene of Cysteine/Histidine-rich C1 domain family protein;(source:Araport11)
0.0384615	0.646154	AT4G33730	ATCAPE1	CAP-DERIVED PEPTIDE 1 (ATCAPE1)	Member of CAP protein superfamily. Encoding a small 11 AA peptide (PAGNYIGARPY) involved in negative regulation of salt tolerance.
0.0389864	0.615984	AT2G47540			Pollen Ole e 1 allergen and extensin family protein;(source:Araport11)
0.0396825	1.20635	AT5G63270			RPM1-interacting protein 4 (RIN4) family protein;(source:Araport11)
0.0412371	0.824742	AT5G24880			chromo domain cec-like protein;(source:Araport11)
0.0444444	1.22222	AT2G03720	MRH6	MORPHOGENESIS OF ROOT HAIR 6 (MRH6)	Involved in root hair development
0.0462259	0.753657	AT4G02270	RHS13,SRPP	SEED AND ROOT HAIR PROTECTIVE PROTEIN (SRPP);ROOT HAIR SPECIFIC 13 (RHS13)	root hair specific 13;(source:Araport11)
0.047619	0.154762	AT1G18975	hypothetical		hypothetical protein;(source:Araport11)
0.0495868	0.363636	AT5G19800	HRGP2	HYDROXYPROLINE-RICH GLYCOPROTEIN 2 (HRGP2); (ATHRGP2)	hydroxyproline-rich glycoprotein family protein;(source:Araport11)
0.05006	0.63729	AT1G05240	PER2,PR9	PATHOGENESIS RELATED 9 (PR9)	Peroxidase superfamily protein;(source:Araport11)
0.0508118	0.6365	AT1G05250	PER1,PRX2	(ATPRX1);PEROXIDASE 2 (PRX2)	Encodes a cationic cell-wall-bound peroxidase homolog that is involved in the lignification of cell walls. Regulated by COG1, involved in seed longevity.
0.0517711	0.395095	AT3G21180	ACA9	(ATACA9);AUTOINHIBITED CA(2+)-ATPASE 9 (ACA9)	one of the type IIB calcium pump isoforms. encodes an autoinhibited Ca(2+)-ATPase that contains an N-terminal calmodulin binding autoinhibitory domain.
0.0539237	0.571679	AT4G40090	AGP3	ARABINOGALACTAN PROTEIN 3 (AGP3)	arabinogalactan protein 3;(source:Araport11)
0.0555556	0.861111	AT1G06923			transcription repressor OFP17-like protein;(source:Araport11)
0.056338	0.728873	AT3G07070	PBL26	PBS1-LIKE 26 (PBL26)	Protein kinase superfamily protein;(source:Araport11)
0.0566929	0.533858	AT5G49270	COBL9,SHV2	COBRA-LIKE 9 (COBL9);MUTANT ROOT HAIR 4 (MRH4);DEFORMED ROOT HAIRS 9 (DER9);SHAVEN 2 (SHV2)	Involved in successfully establishing tip growth in root hairs.
0.0582524	0.31068	AT4G25190	QWRF7	QWRF DOMAIN CONTAINING 7 (QWRF7)	QWRF motif protein (DUF566);(source:Araport11)
0.0584192	0.477663	AT5G15890	TBL21	TRICHOME BIREFRINGENCE-LIKE 21 (TBL21)	Encodes a member of the TBL (TRICHOME BIREFRINGENCE-LIKE) gene family containing a plant-specific DUF231 (domain of unknown function) domain. TBL gene family has 46 members, two of which (TBR/AT5G06700 and TBL3/AT5G01360) have been shown to be involved in the synthesis and deposition of secondary wall cellulose, presumably by influencing the esterification state of pectic polymers. A nomenclature…
0.0589431	0.428862	AT2G41970	MRI	MARIS (MRI)	Encodes MRI, a plasma membrane-localized member of the RLCK-VIII subfamily. Preferentially expressed in both pollen tubes and root hairs. mri-knockout mutants display spontaneous pollen tube and root-hair bursting.
0.0590278	0.524306	AT5G19790	RAP2.11	RELATED TO AP2 11 (RAP2.11)	encodes a member of the ERF (ethylene response factor) subfamily B-6 of ERF/AP2 transcription factor family (RAP2.11). The protein contains one AP2 domain. There are 12 members in this subfamily including RAP2.11.
0.06	0.466667	AT3G60280	UCC3	UCLACYANIN 3 (UCC3)	Encodes blue copper-binding protein III.
0.0604027	0.483221	AT5G19560	ROPGEF10	ARABIDOPSIS THALIANA ROP UANINE NUCLEOTIDE EXCHANGE FACTOR 10 (ATROPGEF10);GUANINE EXCHANGE FACTOR 10 (GEF10);ROP (RHO OF PLANTS) GUANINE NUCLEOTIDE EXCHANGE FACTOR 10 (ROPGEF10)	Encodes a member of KPP-like gene family, homolog of KPP (kinase partner protein) gene in tomato. Also a member of the RopGEF (guanine nucleotide exchange factor) family, containing the novel PRONE domain (plant-specific Rop nucleotide exchanger), which is exclusively active towards members of the Rop subfamily.
0.0607921	0.573227	AT2G45220	PME17	(ATPME17);PECTIN METHYLESTERASE 17 (PME17)	Pectin methylesterase involved in pectin remodelling. Regulated by its PRO region that triggers PME activity in the resistance to Botrytis cinerea.
0.0645161	1.04839	AT1G26970	PBL4	PBS1-LIKE 4 (PBL4)	Protein kinase superfamily protein;(source:Araport11)
0.0645161	0.413978	AT2G26420	PIP5K3	1-PHOSPHATIDYLINOSITOL-4-PHOSPHATE 5-KINASE 3 (PIP5K3)	Encodes a phosphatidylinositol-4-phosphate 5-kinase. Exclusively expressed in roots. Essential for root hair growth.
0.0660377	1	AT5G36270			Annotated as pseudogene of dehydroascorbate reductase. Probably not a pseudogene based on evidence for transcription (RNA-seq) and translation (Ribo-seq) described in PMID:27791167
0.0682927	0.54878	AT4G29180	RHS16	ROOT HAIR SPECIFIC 16 (RHS16)	root hair specific 16;(source:Araport11)
0.0684262	0.501466	AT5G05500	MOP10	(MOP10);PROLINE-RICH PROTEIN-LIKE 1 (PRPL1); (ATPRPL1)	Encodes Proline-rich protein-like PRPL1, controls elongation of root hairs.
0.0691824	0.283019	AT2G23410	CPT,DPS	CIS-PRENYLTRANSFERASE (ACPT); (ATCPT3);CIS-PRENYLTRANSFERASE 3 (CPT3);CIS-PRENYLTRANSFERASE (CPT)	Encodes cis-prenyltransferase involved in dolichol biosynthesis.
0.0720339	1.0678	AT4G33880	RSL2	ROOT HAIR DEFECTIVE 6-LIKE 2 (RSL2)	RSL2 was expressed concurrently with RSL4 and its expression was controlled by RHD6 and RSL1. Required for root-hair growth.
0.0733945	0.366972	AT5G01280	BPP3	BASIC PROLINE-RICH PROTEIN3 (BPP3)	Encodes a microtubule-associated protein.
0.0740741	0.555556	AT1G30050	MADA3	(MADA3)	tropomyosin;(source:Araport11)
0.0769231	0.307692	AT5G45090	PP2-A7	PHLOEM PROTEIN 2-A7 (PP2-A7);PHLOEM PROTEIN 2-A7 (AtPP2-A7)	phloem protein 2-A7;(source:Araport11)
0.0785714	0.757143	AT5G43230			EEIG1/EHBP1 protein amino-terminal domain protein;(source:Araport11)
0.0809399	0.428198	AT2G34910	AT2G34910		root hair specific protein;(source:Araport11)
0.0831426	0.623733	AT5G47450	TIP2;3	ARABIDOPSIS THALIANA TONOPLAST INTRINSIC PROTEIN 2;3 (ATTIP2;3);DELTA-TONOPLAST INTRINSIC PROTEIN 3 (DELTA-TIP3);TONOPLAST INTRINSIC PROTEIN 2;3 (TIP2;3)	Tonoplast intrinsic protein, transports ammonium (NH3) and methylammonium across the tonoplast membrane, gene expression shows diurnal regulation and is upregulated by ammonium (NH3).
0.0832025	0.701727	AT4G00680	ADF8	ACTIN DEPOLYMERIZING FACTOR 8 (ADF8)	actin depolymerizing factor 8;(source:Araport11)
0.0833333	0.989583	AT5G14340	MYB40	MYB DOMAIN PROTEIN 40 (MYB40);MYB DOMAIN PROTEIN 40 (AtMYB40)	Member of the R2R3 factor gene family.
0.0833333	0.944444	AT5G25451			Pseudogene of AT5G25440; protein kinase family protein
0.0833333	0.916667	AT3G24400	PERK2	PROLINE-RICH EXTENSIN-LIKE RECEPTOR KINASE 2 (AtPERK2);PROLINE-RICH EXTENSIN-LIKE RECEPTOR KINASE 2 (PERK2)	Encodes a member of the proline-rich extensin-like receptor kinase (PERK) family. This family consists of 15 predicted receptor kinases (PMID: 15653807).
0.0842912	0.351606	AT3G54590	EXT2,HRGP1	HYDROXYPROLINE-RICH GLYCOPROTEIN (ATHRGP1);EXTENSIN 2 (EXT2);HYDROXYPROLINE-RICH GLYCOPROTEIN (HRGP1)	Encodes a hydroxyproline-rich glycoprotein. The mRNA is cell-to-cell mobile.
0.0848485	0.605051	AT1G48930		GLYCOSYL HYDROLASE 9C1 (GH9C1);GLYCOSYL HYDROLASE 9C1 (AtGH9C1)	glycosyl hydrolase 9C1;(source:Araport11)
0.0857143	0.942857	AT3G47740		A. THALIANA ABC2 HOMOLOG 2 (ATATH2);ATP-BINDING CASSETTE A3 (ABCA3);ABC2 HOMOLOG 2 (ATH2)	member of ATH subfamily
0.0868233	0.606742	AT1G19900		RUBY PARTICLES IN MUCILAGE (RUBY)	RUBY encodes a secreted galactose oxidase involved in cell wall modification.
0.0869565	0.347826	AT5G58784	DDS5,CPT5		Undecaprenyl pyrophosphate synthetase family protein;(source:Araport11)
0.0873362	0.866084	AT1G01750	ADF11	ACTIN DEPOLYMERIZING FACTOR 11 (ADF11)	actin depolymerizing factor 11;(source:Araport11)
0.0873786	0.417476	AT5G05390	LAC12	LACCASE 12 (LAC12)	putative laccase, a member of laccase family of genes (17 members in Arabidopsis).
0.0882353	0.632353	AT2G19060			SGNH hydrolase-type esterase superfamily protein;(source:Araport11)
0.0886076	0.35443	AT2G03370	O-linked-mannose beta-1,4-N-acetylglucosaminyltransferase-like		O-linked-mannose beta-1,4-N-acetylglucosaminyltransferase-like protein;(source:Araport11)
0.0888889	0.488889	AT4G14280			ARM repeat superfamily protein;(source:Araport11)
0.0890052	0.471204	AT2G29010			pseudogene of Leucine-rich repeat protein kinase family protein;(source:Araport11)
0.0909091	1	AT1G34330			Possibly not a pseudogene based on evidence for transcription (RNA-seq) and translation (Ribo-seq) described in PMID:27791167
0.0909091	0.61039	AT1G74830			myosin-binding protein, putative (Protein of unknown function, DUF593);(source:Araport11)
0.0981873	0.0830816	AT5G35935	copia-like		transposable_element_gene;(source:Araport11);copia-like retrotransposon family, has a 2.0e-232 P-value blast match to GB:CAA72989 open reading frame 1 (Ty1_Copia-element) (Brassica oleracea);(source:TAIR10)
0.1	0.328571	AT1G61950	CPK19	CALCIUM-DEPENDENT PROTEIN KINASE 19 (CPK19)	member of Calcium Dependent Protein Kinase
0.100187	0.747191	AT1G07520			GRAS family transcription factor;(source:Araport11)
0.100775	0.0542636	AT2G15020	hypothetical		hypothetical protein;(source:Araport11)
0.101836	0.634391	AT2G47360			transmembrane protein;(source:Araport11)
0.101896	0.462085	AT5G61350	CAP1	ERULUS (ERU);[CA2+]CYT-ASSOCIATED PROTEIN KINASE 1 (CAP1)	Encodes a membrane-localized receptor-like kinase that regulates root hair tip growth by maintaining cytoplasmic Ca2+ gradients. Knockouts of CAP1 produced more cytoplasmic NH4+ and ceased growth of root hairs on MS medium except when NH4+ was depleted; NH4+ depletion reestablished the Ca2+ gradient necessary for normal growth. The lower net NH4+ influx across the vacuolar membrane and relatively…
0.102041	0.469388	AT3G51570			Disease resistance protein (TIR-NBS-LRR class) family;(source:Araport11)
0.102426	1.60108	AT1G43160	RAP2.6	ETHYLENE RESPONSIVE FACTOR113 (ERF113);RELATED TO AP2 6 (RAP2.6)	encodes a member of the ERF (ethylene response factor) subfamily B-4 of ERF/AP2 transcription factor family (RAP2.6). The protein contains one AP2 domain. There are 7 members in this subfamily.
0.104054	0.474324	AT5G24410		6-PHOSPHOGLUCONOLACTONASE 4 (PGL4)	Encodes a cytosolic 6-phosphogluconolactonase (PGL) thought to be involved in the oxidative pentose-phosphate pathway (OPPP).
0.105263	0.763158	AT4G20190			hypothetical protein;(source:Araport11)
0.106061	1.12121	AT5G24155			FAD/NAD(P)-binding oxidoreductase family protein;(source:Araport11)
0.108108	0.351351	AT1G70640	PB1 domain prot.		octicosapeptide/Phox/Bem1p (PB1) domain-containing protein;(source:Araport11)
0.108949	0.48249	AT5G62310	IRE	INCOMPLETE ROOT HAIR ELONGATION (IRE)	Encodes a protein with a serine/threonine kinase domain. There are two other closely related members in Arabidopsis. Knock-out mutation results in incomplete root hair elongation. Expression is found all organs examined but is especially strong in elongating root hairs.
0.111111	0.444444	AT2G14760			basic helix-loop-helix (bHLH) DNA-binding superfamily protein;(source:Araport11)
0.112172	0.5179	AT3G09925			Involved in shoot regeneration from root explants.
0.114625	0.671937	AT1G79320		METACASPASE 6 (AtMC6);METACASPASE 2C (MCP2c);METACASPASE 6 (MC6);METACASPASE 2C (AtMCP2c)	Encodes a putative metacaspase. Arabidopsis contains three type I MCP genes (MCP1a-c) and six type II MCP genes (MCP2a?f): AtMCP1a/At5g64240, AtMCP1b/At1g02170, AtMCP1c/At4g25110, AtMCP2a/At1g79310, AtMCP2b/At1g79330, AtMCP2c/At1g79320, AtMCP2d/At1g79340, AtMCP2e/At1g16420, AtMCP2f/At5g04200.
0.115942	1.07246	AT1G56600	GOLS2	GALACTINOL SYNTHASE 2 (GolS2);GALACTINOL SYNTHASE 2 (AtGolS2)	GolS2 is a galactinol synthase that catalyzes the formation of galactinol from UDP-galactose and myo-inositol. GolS2 transcript levels rise in response to methyl viologen, an oxidative damage-inducing agent. Plants over-expressing GolS2 have increased tolerance to salt, chilling, and high-light stress.
0.117647	0.764706	AT2G22290	RABH1d	ARABIDOPSIS RAB GTPASE HOMOLOG 6 (ATRAB6);RAB GTPASE HOMOLOG H1D (RABH1d);RAB GTPASE HOMOLOG H1D (RAB-H1D);ARABIDOPSIS RAB GTPASE HOMOLOG H1D (ATRAB-H1D);RAB GTPASE HOMOLOG H1D (ATRABH1D)	RAB GTPase homolog H1D;(source:Araport11)
0.12766	0.516844	AT2G18980	PRX16	(PRX16)	Class III peroxidase cell wall-targeted protein localized to the micropylar endosperm facing the radicle. Involved in seed germination.
0.12766	0.446809	AT2G23400		CIS-PRENYLTRANSFERASE 2 (CPT2); (ATCPT2)	Undecaprenyl pyrophosphate synthetase family protein;(source:Araport11)
0.128205	0.615385	AT1G25240	PICALM9A	(PICALM6); (PICALM9A)	ENTH/VHS/GAT family protein;(source:Araport11)
0.128692	0.377637	AT1G12950	RSH2,DTX31	ROOT HAIR SPECIFIC 3 (RHS3);ROOT HAIR SPECIFIC 2 (RSH2);RELA/SPOT HOMOLOG 2 (RSH2); (ATDTX31);ROOT HAIR SPECIFIC 2 (RHS2)	root hair specific 2;(source:Araport11)
0.129032	1.23118	AT4G30320	CAPE6	(ATCAPE6)	CAP (Cysteine-rich secretory proteins, Antigen 5, and Pathogenesis-related 1 protein) superfamily protein;(source:Araport11)
0.12963	0.351852	AT3G50150	putative		transmembrane protein, putative (DUF247);(source:Araport11)
0.132075	0.618868	AT5G16023	RTFL18	ROTUNDIFOLIA LIKE 18 (RTFL18);DEVIL 1 (DVL1)	Encodes a plant peptide that could be involved in the coordination of socket cell development in wild-type plants.
0.132075	0.672956	AT3G24750	LAZY5	(LAZY5)	Encodes a member of the LAZY gene family that is expressed in the hypocotyl and the root
0.135593	0.694915	AT5G52260	MYB19	MYB DOMAIN PROTEIN 19 (MYB19);MYB DOMAIN PROTEIN 19 (AtMYB19)	Member of the R2R3 factor gene family.
0.13587	0.407609	AT1G55430			Cysteine/Histidine-rich C1 domain family protein;(source:Araport11)
0.136345	0.458752	AT2G36100	CASP1	CASPARIAN STRIP MEMBRANE DOMAIN PROTEIN 1 (CASP1)	Encodes a membrane bound protein involved in formation of the casparian strip. Along with CASP 2 it is required for the localization of ESB1.
0.137699	0.582053	AT4G30170	PER45		Peroxidase family protein;(source:Araport11)
0.13913	0.826087	AT4G08620		SULPHATE TRANSPORTER 1;1 (SULTR1;1); (SULTR1.2)	Encodes a high-af?nity sulfate transporter. Contains STAS domain. Expressed in roots and guard cells. Up-regulated by sulfur deficiency.
0.139535	0.302326	AT2G08450	putative		None;(source:Araport11)
0.141509	0.199461	AT5G44440	BBE28	(ATBBE28)	FAD-binding Berberine family protein;(source:Araport11)
0.142857	0.6	AT4G09110		ARABIDOPSIS TOXICOS EN LEVADURA 35 (ATL35)	RING/U-box superfamily protein;(source:Araport11)
0.147059	0.294118	AT5G26320	TRAF-like protein		TRAF-like family protein;(source:Araport11)
0.147198	0.780554	AT2G27370	CASP3	CASPARIAN STRIP MEMBRANE DOMAIN PROTEIN 3 (CASP3)	Uncharacterized protein family (UPF0497);(source:Araport11)
0.147727	0.738636	AT1G05650			Pectin lyase-like superfamily protein;(source:Araport11)
0.148936	3.76596	AT3G03480	CHAT	ACETYL COA:(Z)-3-HEXEN-1-OL ACETYLTRANSFERASE (CHAT)	acetyl CoA:(Z)-3-hexen-1-ol acetyltransferase;(source:Araport11)
0.149606	0.240157	AT5G42600	MRN1	MARNERAL SYNTHASE 1 (MRN1)	Encodes an oxidosqualene synthase that produces the monocyclic triterpene marneral. Crucial for growth and development.
0.15	1.225	AT5G18910			Protein kinase superfamily protein;(source:Araport11)
0.15	1.71667	AT1G02230		NAC DOMAIN CONTAINING PROTEIN 4 (NAC004);NAC DOMAIN CONTAINING PROTEIN 4 (ANAC004)	NAC domain containing protein 4;(source:Araport11)
0.152174	0.608696	AT5G57400			transmembrane protein;(source:Araport11)
0.153846	1.05128	AT2G19410	PUB34	(PUB34)	Plant U-box type E3 ubiquitin ligase (PUB).
0.153846	1.12821	AT3G03225			Natural antisense transcript overlaps with AT3G16180;(source:Araport11)
0.153846	4.07692	AT3G11920			glutaredoxin-like protein;(source:Araport11)
0.153846	0.42915	AT4G27290			S-locus lectin protein kinase family protein;(source:Araport11)
0.15452	0.773629	AT5G60660	PIP2-4	(PIP2F);PLASMA MEMBRANE INTRINSIC PROTEIN 2;4 (PIP2;4)	A member of the plasma membrane intrinsic protein subfamily PIP2.When expressed in yeast cells can conduct hydrogen peroxide into those cells. Mutants exhibit longer root hairs.
0.154867	0.659292	AT2G29620			dentin sialophosphoprotein;(source:Araport11)
0.155909	0.395233	AT5G52790	CBS domain protein		CBS domain protein with a domain protein (DUF21);(source:Araport11)
0.15748	0.496063	AT5G61550	PUB52	(PUB52)	U-box domain-containing protein kinase family protein;(source:Araport11)
0.15778	0.473341	AT3G48340		CYSTEINE ENDOPEPTIDASE 2 (CEP2)	KDEL-tailed cysteine endopeptidase. Mutants generated via RNAi show decreased lateral root growth.
0.162272	0.849899	AT4G09990	GXM2	GLUCURONOXYLAN METHYLTRANSFERASE 2 (GXM2)	glucuronoxylan 4-O-methyltransferase-like protein (DUF579);(source:Araport11)
0.1625	0.2625	AT4G13890	EDA36	SERINE HYDROXYMETHYLTRANSFERASE 5 (SHM5);EMBRYO SAC DEVELOPMENT ARREST 36 (EDA37);EMBRYO SAC DEVELOPMENT ARREST 37 (EDA36)	Pyridoxal phosphate (PLP)-dependent transferases superfamily protein;(source:Araport11)
0.164378	0.617889	AT2G32300	UCC1	UCLACYANIN 1 (UCC1)	Encodes a uclacyanin, a protein precursor that is closely related to precursors of stellacyanins and a blue copper protein from pea pods.
0.165929	0.732301	AT2G39040	PER24		Peroxidase superfamily protein;(source:Araport11)
0.166667	0.651515	AT1G14220			Ribonuclease T2 family protein;(source:Araport11)
0.167442	0.334884	AT3G21340			Leucine-rich repeat protein kinase family protein;(source:Araport11)
0.167917	0.643699	AT3G01190	PER27		Peroxidase superfamily protein;(source:Araport11)
0.169429	0.405525	AT5G23980	FRO4	FERRIC REDUCTION OXIDASE 4 (FRO4); (ATFRO4)	Encodes a ferric chelate reductase that is expressed at low levels in roots,shoots and cotyledons, but not flowers. Its transcription is regulated by FIT1.
0.170886	0.848101	AT1G12150			weak chloroplast movement under blue light protein (DUF827);(source:Araport11)
0.171206	0.625602	AT4G17340	TIP2;2	(DELTA-TIP2);TONOPLAST INTRINSIC PROTEIN 2;2 (TIP2;2)	tonoplast intrinsic protein 2;(source:Araport11)
0.172414	0.344828	AT1G68320	MYB62	MYB DOMAIN PROTEIN 62 (MYB62); (BW62C); (BW62B);MYB DOMAIN PROTEIN 62 (AtMYB62)	putative transcription factor: R2R3-MYB transcription family. Involved in regulation of phosphate starvation responses and gibberellic acid biosynthesis.
0.172727	2.02727	AT4G33790		ECERIFERUM 4 (CER4);FATTY ACID REDUCTASE 3 (FAR3); (G7)	Encodes an alcohol-forming fatty acyl-CoA reductase, involved in cuticular wax biosynthesis. Lines carrying recessive mutations are deficient in primary alcohol and have glossy stem surfaces.
0.173077	0.673077	AT1G48670			auxin-responsive GH3 family protein;(source:Araport11)
0.173913	1.17391	AT5G54148			sarcosine dehydrogenase-2C protein;(source:Araport11)
0.174466	0.658046	AT3G21670	NPF6.4	(ATNPF6.4);NRT1/ PTR FAMILY 6.4 (NPF6.4)	Major facilitator superfamily protein;(source:Araport11)
0.175	0.488235	AT5G47950		HXXXD-TYPE ACYL-TRANSFERASE FAMILY PROTEIN (THAA2);BRASSINOSTEROID INACTIVATOR2 (BIA2)	BIA2 is a putative HXXXD-type BAHD acyltransferase. Overexpression results in a BR deficient phenotype and is dependent on a functional HXXXD motif. BIA2 may function in BR homeostasis by regulating the pool of bioactive BR.
0.175772	0.408551	AT2G17060			Disease resistance protein (TIR-NBS-LRR class) family;(source:Araport11)
0.176056	0.714789	AT1G06120		ACYL-LIPID DESATURASE1.4 (ADS1.4)	Membrane bound acyl-lipid desaturases which can perform &#916;9 desaturation.
0.178571	0.571429	AT2G35990		LONELY GUY 2 (LOG2)	Putative lysine decarboxylase family protein;(source:Araport11)
0.181435	0.759494	AT4G25480	DREB1A	DEHYDRATION RESPONSE ELEMENT B1A (DREB1A); (ATCBF3);C-REPEAT BINDING FACTOR 3 (CBF3)	Encodes a member of the DREB subfamily A-1 of ERF/AP2 transcription factor family (CBF3). The protein contains one AP2 domain. There are six members in this subfamily, including CBF1, CBF2, and CBF3. This gene is involved in response to low temperature and abscisic acid.
0.181818	0.727273	AT4G28840	TIE1	TCP INTERACTOR CONTAINING EAR MOTIF PROTEIN 1 (TIE1)	Encodes TCP INTERACTOR-CONTAINING EAR MOTIF PROTEIN 1 (TIE1), an important repressor of CINCINNATA (CIN)-like TEOSINTE BRANCHED1/CYCLOIDEA/PCF (TCP) transcription factors, which are key for leaf development.
0.182616	0.181738	AT4G14400		(DEG16);ACCELERATED CELL DEATH 6 (ACD6)	encodes a novel protein with putative ankyrin and transmembrane regions. It is a member of one of the largest uncharacterized gene families in higher plants. The gene is involved in resistance to Pseudomonas syringae.
0.183824	0.764706	AT3G53200	MYB27	MYB DOMAIN PROTEIN 27 (AtMYB27);MYB DOMAIN PROTEIN 27 (MYB27)	Member of the R2R3 factor gene family.
0.184211	0.546053	AT3G48520	CYP94B3	CYTOCHROME P450, FAMILY 94, SUBFAMILY B, POLYPEPTIDE 3 (CYP94B3)	CYP94B3 is a jasmonoyl-isoleucine-12-hydroxylase that catalyzes the formation of 12-OH-JA-Ile from JA-Ile. By reducing the levels of this the biologically active phytohormone, CYP94B3 attenuates the jasmonic acid signaling cascade. CYP94B3 transcript levels rise in response to wounding.
0.184902	0.444869	AT1G18980			RmlC-like cupins superfamily protein;(source:Araport11)
0.185185	1.22222	AT1G33090			MATE efflux family protein;(source:Araport11)
0.186441	2.49153	AT1G23160	GH3.7	GRETCHEN HAGEN 3.7 (GH3.7)	Acyl acid amido synthetase involved in conjugation of an amino acid to a plant hormone, a reaction that regulates free hormone concentration and downstream responses. Can also conjugate chorismate, a precursor of aromatic amino acids and salicylic acid, to cysteine and glutamate, respectively.
0.186441	0.355932	AT5G20045			transmembrane protein;(source:Araport11)
0.189189	0.594595	AT4G19430			hypothetical protein;(source:Araport11)
0.189504	0.423907	AT2G45680	TCP9	TCP DOMAIN PROTEIN 9 (TCP9)	TCP family transcription factor;(source:Araport11)
0.189655	2.12069	AT5G64572			Natural antisense transcript overlaps with AT5G64570;(source:Araport11)
0.191819	0.36114	AT3G09220	LAC7	LACCASE 7 (LAC7)	putative laccase, a member of laccase family of genes (17 members in Arabidopsis).
0.192308	0.711538	AT4G37225			Natural antisense transcript overlaps with AT4G37230;(source:Araport11)
0.192651	0.311817	AT2G42540	COR15A	COLD-REGULATED 15A (COR15A); (ATCOR15A); (COR15)	A cold-regulated gene whose product is targeted to the chloroplast. Cor15am protects stromal proteins from aggregation under various stress conditions. Constitutive expression increases freezing tolerance in protoplasts in vitro and chloroplasts in vivo. NMR and x-ray diffraction studies suggest that COR15a alters the intrinsic curvature of the inner membrane of chloroplast envelope. Late Embryog…
0.192982	0.701754	AT5G07450		CYCLIN P4;3 (CYCP4;3)	cyclin p4;(source:Araport11)
0.193548	0.806452	AT4G07585			novel transcribed region; detected in root, root apical meristem, leaf, dark-grown seedling, light-grown seedling, aerial;(source:Araport11)
0.193548	0.903226	AT4G09130		ARABIDOPSIS TOXICOS EN LEVADURA 37 (ATL37)	RING/U-box superfamily protein;(source:Araport11)
0.194074	0.232593	AT5G59260		L-TYPE LECTIN RECEPTOR KINASE II.1 (LECRK-II.1)	Concanavalin A-like lectin protein kinase family protein;(source:Araport11)
0.194672	0.907787	AT5G23990	FRO5	FERRIC REDUCTION OXIDASE 5 (FRO5);FERRIC REDUCTION OXIDASE 5 (ATFRO5)	Encodes a ferric chelate reductase that is expressed at low levels in roots,shoots and flowers, but not cotyledons.
0.195122	0.400697	AT3G03500			TatD related DNase;(source:Araport11)
0.195652	0.466403	AT3G20940	CYP705A30	CYTOCHROME P450, FAMILY 705, SUBFAMILY A, POLYPEPTIDE 30 (CYP705A30)	a member of A-type cytochrome P450
0.195946	0.121622	AT2G11810	MGDC	MONOGALACTOSYLDIACYLGLYCEROL SYNTHASE TYPE C (MGDC); (ATMGD3);MONOGALACTOSYL DIACYLGLYCEROL SYNTHASE 3 (MGD3)	MGD3 is the major enzyme for galactolipid metabolism during phosphate starvation. Does not contribute to galactolipid synthesis under P1-sufficient conditions.
0.196139	0.264093	AT5G57550	XTH25	XYLOGLUCAN ENDOTRANSGLUCOSYLASE/HYDROLASE 25 (XTH25);XYLOGLUCAN ENDOTRANSGLYCOSYLASE 3 (XTR3)	xyloglucan endotransglycosylase-related protein (XTR3)
0.196185	0.722071	AT2G15370	FUT5	ARABIDOPSIS FUCOSYLTRANSFERASE 5 (ATFUT5);FUCOSYLTRANSFERASE 5 (FUT5)	Predicted fucosyltransferase, based on similarity to FUT1, but not functionally redundant with FUT1.
0.198095	1.46952	AT1G29785		SHORT OPEN READING FRAME 11 (SORF11)	Natural antisense transcript overlaps with AT1G29780. Has been identified as a translated small open reading frame by ribosome profiling.
0.198121	0.496869	AT3G54580	EXT17	EXTENSIN 17 (EXT17)	Proline-rich extensin-like family protein;(source:Araport11)
0.199301	0.664336	AT1G29020			Calcium-binding EF-hand family protein;(source:Araport11)
0.2	0.566667	AT3G11415			other_RNA;(source:Araport11)
0.2	0.32	AT1G65570		ROOT CAP POLYGALACTURONASE (RCPG)	Encodes a glycosyl hydrolase 28 (GH28) family polygalacturonase (PG) protein. Involved in root cap development.
0.201681	0.714286	AT5G08725			None;(source:Araport11)
0.201754	1.05263	AT5G10990		SMALL AUXIN UPREGULATED RNA 69 (SAUR69)	SAUR-like auxin-responsive protein family;(source:Araport11)
0.204598	0.517241	AT5G45070		PHLOEM PROTEIN 2-A8 (PP2-A8);PHLOEM PROTEIN 2-A8 (AtPP2-A8)	phloem protein 2-A8;(source:Araport11)
0.205882	0.647059	AT3G14710			RNI-like superfamily protein;(source:Araport11)
0.206522	0.673913	AT5G54790		VASCULAR-RELATED UNKNOWN PROTEIN 4 (VUP4)	CTD small phosphatase-like protein;(source:Araport11)
0.20712	1.62055	AT1G02470			Polyketide cyclase/dehydrase and lipid transport superfamily protein;(source:Araport11)
0.207171	0.474104	AT5G10230	ANNAT7	ANNEXIN 7 (ANN7);ANNEXIN 7 (ANNAT7)	Encodes a calcium-binding protein annexin (AnnAt7).
0.207892	0.637809	AT5G65530	RLCK VI_A3	ARABIDOPSIS RECEPTOR-LIKE CYTOPLASMIC KINASE ATRLCK VI_A3 (ATRLCK VI_A3)	Encodes a protein kinase involved in mediating resistance to fungi and also trichome branch number. Kinase activity is increased by ROP6 which also affects its sub-cellular localization (becomes localized to the cell periphery_
0.208163	0.35102	AT2G37820			Cysteine/Histidine-rich C1 domain family protein;(source:Araport11)
0.208686	0.413912	AT1G65690	NHL6	NDR1/HIN1-LIKE 6 (NHL6)	Encodes NHL6 (NDR1/HIN1-like 6). Plays an important role in the abiotic stresses-induced ABA signaling and biosynthesis, particularly during seed germination and early seedling development.
0.209402	0.333333	AT5G20860	PME54		Plant invertase/pectin methylesterase inhibitor superfamily;(source:Araport11)
0.210526	0.723684	AT4G19975			nucleotide-diphospho-sugar transferase family protein;(source:Araport11)
0.210526	1.84211	AT4G01975			transposable_element_gene;(source:Araport11);pseudogene, similar to B, blastp match of 51%25 identity and 4.5e-98 P-value to GP|22830897|dbj|BAC15771.1||AB087616 B {Oryza sativa (japonica cultivar-group)};(source:TAIR10)
0.21125	0.49875	AT1G44970	PER9	PEROXIDASE 9 (PER9);PEROXIDASE9 (PRX9)	Encodes a class III peroxidase that is genetically redundant with PRX40, expressed in the tapetum, and essential for proper anther and pollen development. Peroxidase required for casparian strip lignification as well as partially required for SGN-dependent compensatory lignification.
0.211382	0.146341	AT5G47000	PER65		Peroxidase superfamily protein;(source:Araport11)
0.212389	1.55752	AT1G57590	PAE2	PECTIN ACETYESTERASE 2 (PAE2);PECTIN ACETYESTERASE 2 (ATPAE2)	Pectinacetylesterase family protein;(source:Araport11)
0.212766	0.276596	AT2G31420			B3 domain protein (DUF313);(source:Araport11)
0.214286	0.607143	AT5G21130			Late embryogenesis abundant (LEA) hydroxyproline-rich glycoprotein family;(source:Araport11)
0.215686	1.05882	AT1G70260		USUALLY MULTIPLE ACIDS MOVE IN AND OUT TRANSPORTERS 36 (UMAMIT36);RESISTANCE TO PHYTOPHTHORA PARASITICA 1 (RTP1)	Encodes an endoplasmic reticulum (ER)-localized nodulin MtN21-like transporter family protein that negatively regulates resistance against biotrophic pathogens but not the necrotrophic pathogen, B. cinerea, possibly by regulating ROS production, cell death and PR1 expression.
0.216216	0.234234	AT3G13840			GRAS family transcription factor;(source:Araport11)
0.216292	0.674157	AT1G70460	PERK13	ROOT HAIR SPECIFIC 10 (RHS10);PROLINE-RICH EXTENSIN-LIKE RECEPTOR KINASE 13 (AtPERK13);PROLINE-RICH EXTENSIN-LIKE RECEPTOR KINASE 13 (PERK13)	Encodes a member of the proline-rich extensin-like receptor kinase (PERK) family. This family consists of 15 predicted receptor kinases (PMID: 15653807).
0.219697	0.306818	AT2G23630		SKU5 SIMILAR 16 (sks16)	SKU5 similar 16;(source:Araport11)
0.219745	0.780255	AT3G10320		MUCILAGE-RELATED 21 (MUCI21);MUCILAGE-MODIFIED 5 (MUM5); (MUM5)	MUCI21 is a GT61 protein required for the production of highly branched xylan in seed coat mucilage. MUCI21 likely decorates xylan with xylose side chains that seem to be necessary for pectin attachment to the seed surface.
0.220109	0.51087	AT5G47530			Auxin-responsive family protein;(source:Araport11)
0.220351	0.663982	AT4G00700		MULTIPLE C2 DOMAIN AND TRANSMEMBRANE REGION PROTEIN 9 (MCTP9)	C2 calcium/lipid-binding plant phosphoribosyltransferase family protein;(source:Araport11)
0.22087	0.838261	AT3G05920		HEAVY METAL ASSOCIATED PROTEIN 24 (ATHMP24)	Heavy metal transport/detoxification superfamily protein;(source:Araport11)
0.221239	0.938053	AT4G03330		SYNTAXIN OF PLANTS 123 (SYP123); (ATSYP123)	member of SYP12 Gene Family
0.221384	0.738365	AT4G34580	COW1,SFH1	CAN OF WORMS1 (COW1); (ATSFH1);SHORT ROOT HAIR 1 (SRH1)	Encodes COW1 (can of worms1), a phosphatidylinositol transfer protein essential for root hair tip growth. The N-terminus of the COW1 protein is 32% identical to an essential phosphatidylinositol transfer protein (PITP), the yeast Sec14 protein (sec14p) while the C-terminus is 34.5% identical to a late nodulin of Lotus japonicus, Nlj16. Expression of COW1 complements the growth defect associated w…
0.22166	0.602227	AT5G01250			alpha 1,4-glycosyltransferase family protein;(source:Araport11)
0.221675	0.674877	AT5G03640			AGCVIII kinase involved in the pulse-induced first positive phototropism.
0.222222	0.513228	AT5G51270	PUB53	(PUB53)	Plant U-box type E3 ubiquitin ligase (PUB).
0.222222	0.194444	AT2G24720	GLR2.2	GLUTAMATE RECEPTOR 2.2 (ATGLR2.2);GLUTAMATE RECEPTOR 2.2 (GLR2.2)	member of Putative ligand-gated ion channel subunit family
0.223589	0.61431	AT2G33790	AGP30	(ATAGP30);ARABINOGALACTAN PROTEIN 30 (AGP30)	pollen Ole e 1 allergen protein containing 14.6% proline residues, similar to arabinogalactan protein (Daucus carota) GI:11322245, SP:Q03211 Pistil-specific extensin-like protein precursor (PELP) {Nicotiana tabacum}; contains Pfam profile PF01190: Pollen proteins Ole e I family
0.224138	0.616379	AT4G25250	PMEI4	PECTINMETHYLESTERASE INHIBITOR 4 (PMEI4)	PMEI4 pectin methyleseterase inhibitor. Expressed in roots.
0.225653	0.62114	AT2G34500		CYTOCHROME P450, FAMILY 710, SUBFAMILY A, POLYPEPTIDE 1 (CYP710A1)	Encodes a protein with C22-sterol desaturase activity. The enzyme was shown to catalyze in the presence of NADPH the conversion of &beta;-sitosterol to stigmasterol, but not that of 24-<i>epi</i>-campesterol to brassicasterol (unlike CYP710A2).
0.226168	0.491589	AT1G71530			Protein kinase superfamily protein;(source:Araport11)
0.227273	0.383117	AT3G06460		ELO HOMOLOG 1 (ELO1)	ELO family protein containing a characteristic histidine motif which binds to AtCb5-B, interacts with AtBI-1
0.227273	0.575758	AT1G76470			NAD(P)-binding Rossmann-fold superfamily protein;(source:Araport11)
0.227273	0.348485	AT5G18560	PUCHI	(PUCHI)	Encodes PUCHI, a member of the ERF (ethylene response factor) subfamily B-1 of ERF/AP2 transcription factor family. The protein contains one AP2 domain. There are 15 members in this subfamily including ATERF-3, ATERF-4, ATERF-7, and leafy petiole. PUCHI is required for morphogenesis in the early lateral root primordium of Arabidopsis. Expressed in early floral meristem (stage 1 to 2). Required fo…
0.227273	0.295455	AT5G21080			Uncharacterized protein;(source:Araport11)
0.228188	1.26846	AT4G05170			basic helix-loop-helix (bHLH) DNA-binding superfamily protein;(source:Araport11)
0.228477	0.490066	AT2G29090		CYTOCHROME P450, FAMILY 707, SUBFAMILY A, POLYPEPTIDE 2 (CYP707A2)	Encodes a protein with ABA 8'-hydroxylase activity, involved in ABA catabolism. Member of the CYP707A gene family. This gene predominantly accumulates in dry seeds and is up-regulated immediately following imbibition. CYP707A2 appears to play a major role in the rapid decrease in ABA levels during early seed imbibition.
0.229811	0.510069	AT3G14940		PHOSPHOENOLPYRUVATE CARBOXYLASE 3 (PPC3);PHOSPHOENOLPYRUVATE CARBOXYLASE 3 (ATPPC3)	Encodes a cytosolic phosphoenolpyruvate carboxylase (PEPC) that has activity when expressed in E.coli. Its mRNA is most abundantly expressed in roots and siliques. PPC3 belongs to the plant-type PEPC family. It can form an enzymatically active complex with a castor bean ortholog of PPC4, which encodes a bacterial-type PEPC. The mRNA is cell-to-cell mobile.
0.230769	0.346154	AT5G22560			transmembrane protein, putative (DUF247);(source:Araport11)
0.230769	0.538462	AT1G70030			Paired amphipathic helix (PAH2) superfamily protein;(source:Araport11)
0.230952	0.669048	AT4G02830			hypothetical protein;(source:Araport11)
0.231649	0.678482	AT1G13080		CYTOCHROME P450, FAMILY 71, SUBFAMILY B, POLYPEPTIDE 2 (CYP71B2)	cytochrome P450 monooxygenase
0.231884	0.57971	AT4G38390	RHS8	ROOT HAIR SPECIFIC 17 (RHS17)	root hair specific 17;(source:Araport11)
0.232365	0.423237	AT1G66060			hypothetical protein (DUF577);(source:Araport11)
0.233333	0.797333	AT4G22200		POTASSIUM TRANSPORT 2/3 (AKT2/3);POTASSIUM TRANSPORT 2/3 (KT2/3); (AKT2); (AKT3)	Encodes AKT2, a photosynthate- and light-dependent inward rectifying potassium channel with unique gating properties that are regulated by phosphorylation. Expressed in guard cell protoplasts and in the phloem and xylem of aerial portions of the plant. The channel can coassemble with another K+ channel, KAT1, in vitro. In guard cells, AKT2/3 is responsible for the Ca2+ sensitivity of the K+ uptak…
0.23681	0.456442	AT2G32270		ZINC TRANSPORTER 3 PRECURSOR (ZIP3)	A member of Zrt- and Irt-related protein (ZIP) family. transcript is induced in response to zinc deficiency in the root. also response to iron deficiency.
0.23895	0.520718	AT2G42060			Cysteine/Histidine-rich C1 domain family protein;(source:Araport11)
0.239316	0.683761	AT1G48640			Transmembrane amino acid transporter family protein;(source:Araport11)
0.240964	0.807229	AT4G01630	EXPA17	(ATHEXP ALPHA 1.13); (EXP17);EXPANSIN A17 (EXPA17);EXPANSIN 17 (ATEXP17);EXPANSIN A17 (ATEXPA17)	member of Alpha-Expansin Gene Family. Naming convention from the Expansin Working Group (Kende et al, 2004. Plant Mol Bio)
0.241468	0.583764	AT4G17280			Auxin-responsive family protein;(source:Araport11)
0.242105	0.315789	AT5G42580		CYTOCHROME P450, FAMILY 705, SUBFAMILY A, POLYPEPTIDE 12 (CYP705A12)	a member of the cytochrome P450 family
0.242347	0.193027	AT1G51470		THIOGLUCOSIDE GLUCOHYDROLASE 5 (TGG5);BETA GLUCOSIDASE 35 (BGLU35)	Encodes a myrosinase.
0.242424	0.545455	AT1G11655			hypothetical protein;(source:Araport11)
0.242921	0.532042	AT1G14080	FUT6	(ATFUT6);FUCOSYLTRANSFERASE 6 (FUT6)	Encodes an alpha-(1,2)-fucosyltransferase.
0.243243	0.216216	AT5G40900			Nucleotide-diphospho-sugar transferase family protein;(source:Araport11)
0.245614	0.461404	AT5G24100			Leucine-rich repeat protein kinase family protein;(source:Araport11)
0.2457	0.692875	AT2G32660		RECEPTOR LIKE PROTEIN 22 (RLP22);RECEPTOR LIKE PROTEIN 22 (AtRLP22)	receptor like protein 22;(source:Araport11)
0.246914	0.518519	AT5G49870			Mannose-binding lectin superfamily protein;(source:Araport11)
0.24802	0.522283	AT2G30520		ROOT PHOTOTROPISM 2 (RPT2)	Encodes a phototropin-interacting NRL protein that is an early signaling component in the phototrophic response and is essential for the phototropin-mediated chloroplast accumulation response but is not involved in the chloroplast avoidance response or stomatal opening.
0.248227	0.208038	AT2G47780		SMALL RUBBER PARTICLE PROTEIN2 (SRP2);LD-ASSOCIATED PROTEIN 2 (LDAP2)	Encodes a small rubber particle protein homolog. Plays dual roles as positive factors for tissue growth and development and in drought stress responses.
0.25	0.5625	AT4G18350	NCED2	NINE-CIS-EPOXYCAROTENOID DIOXYGENASE 2 (ATNCED2);NINE-CIS-EPOXYCAROTENOID DIOXYGENASE 2 (NCED2)	Encodes 9-<i>cis</i>-epoxycarotenoid dioxygenase, a key enzyme in the biosynthesis of abscisic acid. The expression of this gene declines during the first 12h of imbibition.
0.25	1.05263	AT1G20120			GDSL-motif esterase/acyltransferase/lipase. Enzyme group with broad substrate specificity that may catalyze acyltransfer or hydrolase reactions with lipid and non-lipid substrates.
0.25	0.642857	AT5G00685			novel transcribed region;(source:Araport11)
0.251142	0.643836	AT5G58750		PROGESTERONE 5&#946;-REDUCTASE (PRISE)	Putative PRISE (progesterone 5&#946;-reductase and/or iridoid synthase-like 1,4-enone reductases).
0.251349	0.547417	AT3G60330		H(+)-ATPASE 7 (AHA7);H(+)-ATPASE 7 (HA7)	H[+]-ATPase 7;(source:Araport11)
0.251641	0.444201	AT1G02340		LONG HYPOCOTYL IN FAR-RED (HFR1);REDUCED PHYTOCHROME SIGNALING 1 (REP1); (FBI1);REDUCED SENSITIVITY TO FAR-RED LIGHT 1 (RSF1)	Encodes a light-inducible, nuclear bHLH protein involved in phytochrome signaling. Mutants exhibit a long-hypocotyl phenotype only under far-red light but not under red light and are defective in other phytochrome A-related responses. Mutants also show blue light response defects. HFR1 interacts with COP1, co-localizes to the nuclear specks and is ubiquinated by COP1.
0.252708	0.685921	AT3G61390	PUB36	(PUB36)	Plant U-box type E3 ubiquitin ligase (PUB).
0.253868	0.459916	AT1G61560		MILDEW RESISTANCE LOCUS O 6 (ATMLO6);MILDEW RESISTANCE LOCUS O 6 (MLO6)	A member of a large family of seven-transmembrane domain proteins specific to plants, homologs of the barley mildew resistance locus o (MLO) protein. The Arabidopsis genome contains 15 genes encoding MLO proteins, with localization in plasma membrane. Phylogenetic analysis revealed four clades of closely-related AtMLO genes. ATMLO6 belongs to the clade IV, with AtMLO2, AtMLO3 and AtMLO12. The gen…
0.254302	0.548757	AT4G13620			encodes a member of the DREB subfamily A-6 of ERF/AP2 transcription factor family. The protein contains one AP2 domain. There are 8 members in this subfamily including RAP2.4. The mRNA is cell-to-cell mobile.
0.254658	0.720497	AT1G35330		ARABIDOPSIS TOXICOS EN LEVADURA 34 (ATL34)	RING/U-box superfamily protein;(source:Araport11)
0.254902	0.431373	AT2G42140			VQ motif-containing protein;(source:Araport11)
0.255507	0.493392	AT4G15330	CYP705A1	CYTOCHROME P450, FAMILY 705, SUBFAMILY A, POLYPEPTIDE 1 (CYP705A1)	cytochrome P450, family 705, subfamily A, polypeptide 1;(source:Araport11)
0.256734	0.356535	AT3G49780	PSK4	PHYTOSULFOKINE 4 PRECURSOR (ATPSK4);PHYTOSULFOKINE 4 PRECURSOR (PSK4); (ATPSK3 (FORMER SYMBOL))	Phytosulfokine 3 precursor, coding for a unique plant peptide growth factor. Plants overexpressing this gene (under a 35S promoter), develop normal cotyledons and hypocotyls but their growth, in particular that of their roots, was faster than that of wildtype.
0.257143	1.14286	AT3G00260			novel transcribed region;(source:Araport11)
0.257576	0.545455	AT1G05660			Pectin lyase-like superfamily protein;(source:Araport11)
0.257812	0.523438	AT5G24770	VSP2	(ATVSP2);VEGETATIVE STORAGE PROTEIN 2 (VSP2)	Has acid phosphatase activity dependent on the presence of divalent cations (Mg2+, Co2+, Zn2+, Mn2+) and anti-insect activity. Insects fed with the protein show a retarded development. Induced in response to abscisic acid, jasmonic acid, salt, water deficiency and wounding.
0.259109	0.91498	AT1G59850			ARM repeat superfamily protein;(source:Araport11)
0.259494	0.512658	AT1G53875			LURP-one-like protein;(source:Araport11)
0.26087	1.6087	AT1G43640		TUBBY LIKE PROTEIN 5 (TLP5);TUBBY LIKE PROTEIN 5 (AtTLP5)	Member of TLP family of tubby like proteins that also contain an F-Box.
0.262712	0.872881	AT4G13440			Calcium-binding EF-hand family protein;(source:Araport11)
0.263349	0.622748	AT3G10420		SEEDLING PLASTID DEVELOPMENT 1 (SPD1)	P-loop containing nucleoside triphosphate hydrolases superfamily protein;(source:Araport11)
0.263736	0.340659	AT5G24140		SQUALENE MONOOXYGENASE 2 (SQP2)	Encodes a protein with similarity to squalene monoxygenases.
0.264368	0.181034	AT2G36750		UDP-GLUCOSYL TRANSFERASE 73C1 (UGT73C1)	UDP-glucosyl transferase 73C1;(source:Araport11)
0.264706	0.382353	AT2G15060			transposable_element_gene;(source:Araport11);CACTA-like transposase family (Tnp1/En/Spm), has a 1.8e-63 P-value blast match to ref|NP_189784.1| TNP1-related protein (Arabidopsis thaliana) (CACTA-element);(source:TAIR10)
0.266209	0.641477	AT2G31751			Potential natural antisense gene, locus overlaps with AT2G31750
0.266404	0.767717	AT3G50640			hypothetical protein;(source:Araport11)
0.266647	0.830069	AT5G61520			Major facilitator superfamily protein;(source:Araport11)
0.267206	0.777328	AT4G30420		USUALLY MULTIPLE ACIDS MOVE IN AND OUT TRANSPORTERS 34 (UMAMIT34)	nodulin MtN21-like transporter family protein
0.267241	0.637931	AT1G79330		METACASPASE 2B (ATMCP2b); (AMC6);METACASPASE 5 (ATMC5);METACASPASE 2B (MCP2b);METACASPASE 5 (MC5)	Metacaspase AtMCPb2/AMC6. Caspase family protein. Arginine/lysine-specific cysteine protease activity. Induces apoptosis in yeast. Contains Pfam domain, PF00656: ICE-like protease (caspase) p20 domain. Arabidopsis contains three type I MCP genes (MCP1a-c) and six type II MCP genes (MCP2a?f): AtMCP1a/At5g64240, AtMCP1b/At1g02170, AtMCP1c/At4g25110, AtMCP2a/At1g79310, AtMCP2b/At1g79330, AtMCP2c/At1…
0.268025	0.552247	AT1G30650		(AR411);WRKY DNA-BINDING PROTEIN 14 (ATWRKY14);WRKY DNA-BINDING PROTEIN 14 (WRKY14)	member of WRKY Transcription Factor; Group II-e
0.268041	0.195876	AT3G20160	GGPS8	GERANYL(GERANYL)DIPHOSPHATE SYNTHASE 8 (ATGGPS8);POLYPRENYL PYROPHOSPHATE SYNTHASE 2 (PPPS2)	Terpenoid synthases superfamily protein;(source:Araport11)
0.268293	1.07317	AT4G02780	GA1	GA REQUIRING 1 (GA1); (ABC33);ENT-COPALYL DIPHOSPHATE SYNTHETASE 1 (CPS1);CPP SYNTHASE (CPS);ARABIDOPSIS THALIANA ENT-COPALYL DIPHOSPHATE SYNTHETASE 1 (ATCPS1)	Catalyzes the conversion of geranylgeranyl pyrophosphate (GGPP) to copalyl pyrophosphate (CPP) of gibberellin biosynthesis
0.269544	0.286645	AT4G33610			glycine-rich protein;(source:Araport11)
0.269841	0.269841	AT5G41030			TCP family transcription factor;(source:Araport11)
0.2705	0.280867	AT3G21320			EARLY FLOWERING protein;(source:Araport11)
0.271247	0.587277	AT5G06300	LOg7	LONELY GUY 7 (LOG7)	Putative lysine decarboxylase family protein;(source:Araport11)
0.272727	1.21212	AT2G33380	PXG3,RD20	RESPONSIVE TO DESICCATION 20 (RD20);CALEOSIN 3 (CLO-3);PEROXYGENASE 3 (PXG3);ARABIDOPSIS THALIANA CALEOSIN 3 (AtCLO3); (ATRD20);CALEOSIN 3 (CLO3)	Encodes a calcium binding protein whose mRNA is induced upon treatment with NaCl, ABA and in response to desiccation. mRNA expression under drought conditions is apparent particularly in leaves and flowers. Isoform of caleosin with a role as a peroxygenase involved in oxylipin metabolism during biotic and abiotic stress. Involved in the production of 2-hydroxy-octadecatrienoic acid. The peroxygen…
0.272727	0.727273	AT5G57650			eukaryotic translation initiation factor-like protein;(source:Araport11)
0.272727	1.13636	AT1G62835			pseudogene of RNA-directed DNA polymerase (reverse transcriptase)-related family protein;(source:Araport11)
0.272727	0.704545	AT1G18280		GLYCOSYLPHOSPHATIDYLINOSITOL-ANCHORED LIPID PROTEIN TRANSFER 3 (LTPG3)	Bifunctional inhibitor/lipid-transfer protein/seed storage 2S albumin superfamily protein;(source:Araport11)
0.273885	0.719745	AT3G46270			receptor protein kinase-like protein;(source:Araport11)
0.274079	0.669037	AT3G04010			O-Glycosyl hydrolases family 17 protein;(source:Araport11)
0.27451	0.0784314	AT3G27250	AITR1	DIG-LIKE 4 (DIL4); (AITR1)	ABA&#8208;induced transcription repressor that acts as feedback regulator in ABA signalling.
0.27451	0.568627	AT2G32680		RECEPTOR LIKE PROTEIN 23 (RLP23);RECEPTOR LIKE PROTEIN 23 (AtRLP23)	NLP20 LRR receptor protein involved in PAMP mediated immunity.
0.275862	0.931034	AT1G53163			membrane-associated kinase regulator;(source:Araport11)
0.275862	0.827586	AT1G67000			Protein kinase superfamily protein;(source:Araport11)
0.27661	1.48752	AT5G39520	CSAP	CHLOROPLAST-LOCALIZED SENESCENCE-ASSOCIATED PROTEIN (CSAP)	Plastid localized transmembrane protein involved in ABA mediated leaf senescence and stomatal movement.
0.276848	0.419786	AT2G28671			hypothetical protein;(source:Araport11)
0.277311	0.378151	AT1G07477			Natural antisense transcript overlaps with AT1G48100;(source:Araport11)
0.27758	0.396797	AT2G16760			Calcium-dependent phosphotriesterase superfamily protein;(source:Araport11)
0.27907	0.294574	AT5G60520			Late embryogenesis abundant (LEA) protein-like protein;(source:Araport11)
0.279221	1.21429	AT3G22640	PAP85	(PAP85)	cupin family protein;(source:Araport11)
0.279966	0.294167	AT2G38940		ARABIDOPSIS THALIANA PHOSPHATE TRANSPORTER 2 (ATPT2);PHOSPHATE TRANSPORTER 1;4 (PHT1;4)	Encodes Pht1;4, a member of the Pht1 family of phosphate transporters which include: Pht1;1/At5g43350, Pht1;2/At5g43370, Pht1;3/At5g43360, Pht1;4/At2g38940, Pht1;5/At2g32830, Pht1;6/At5g43340, Pht1;7/At3g54700, Pht1;8/At1g20860, Pht1;9/At1g76430 (Plant Journal 2002, 31:341). Expression is upregulated in the shoot of cax1/cax3 mutant and is responsive to phosphate (Pi) and not phosphite (Phi) in r…
0.280206	0.544987	AT3G14440	NCED3	NINE-CIS-EPOXYCAROTENOID DIOXYGENASE 3 (NCED3);SUGAR INSENSITIVE 7 (SIS7);SALT TOLERANT 1 (STO1); (ATNCED3)	Encodes 9-<i>cis</i>-epoxycarotenoid dioxygenase, a key enzyme in the biosynthesis of abscisic acid. Regulated in response to drought and salinity. Expressed in roots, flowers and seeds. Localized to the chloroplast stroma and thylakoid membrane.
0.280817	0.433751	AT4G28720	YUC8	CYTOKININ INDUCED ROOT CURLING 2 (CKRC2);YUCCA 8 (YUC8)	Auxin biosynthetic gene regulated by RVE1. Overexpression leads to suppression of bri1 phenotype.
0.281517	0.354637	AT1G29395	COR413IM1	COLD REGULATED 414 THYLAKOID MEMBRANE 1 (COR414-TM1); (DEG25);COLD REGULATED 314 THYLAKOID MEMBRANE 1 (COR413-TM1);COLD REGULATED 314 INNER MEMBRANE 1 (COR413IM1)	Integral membrane protein in the inner envelope of chloroplasts. Provide freezing tolerance. Expression is induced by short-term cold-treatment, water deprivation, and abscisic acid treatment. involved in response to salt tolerance
0.281711	0.497385	AT5G64100	PRX69	(PRX69)	Class III peroxidase cell wall-targeted protein localized to the micropylar endosperm facing the radicle. Involved in seed germination.
0.282132	0.489028	AT1G61480			S-locus lectin protein kinase family protein;(source:Araport11)
0.282609	0.788043	AT2G20080	TIE2	TCP INTERACTOR CONTAINING EAR MOTIF PROTEIN 2 (TIE2)	hypothetical protein;(source:Araport11)
0.282609	0.978261	AT4G13160			zein-binding protein (Protein of unknown function, DUF593);(source:Araport11)
0.283019	0.836478	AT1G51880	RHS6	ROOT HAIR SPECIFIC 6 (RHS6)	root hair specific 6;(source:Araport11)
0.283149	0.794576	AT3G28740		CYTOCHROME P450, FAMILY 81, SUBFAMILY D, POLYPEPTIDE 11 (CYP81D11)	Encodes a member of the cytochrome p450 family. Expression is upregulated in response to cis-jasmonate treatment. Overexpression induces synthesis of volatile compounds that affect chemical ecology and insect interactions.
0.283186	0.584071	AT5G05085			transmembrane protein;(source:Araport11)
0.283489	0.246106	AT1G55990			glycine-rich protein;(source:Araport11)
0.28356	0.426345	AT3G29810	COBL2	COBRA-LIKE PROTEIN 2 PRECURSOR (COBL2)	During the course of seed coat epidermal cell differentiation, COBRA-LIKE 2 plays a role in cellulose deposition into mucilage secretory cells of Arabidopsis seeds. COBRA-LIKE 2 affects mucilage solubility and cellulosic ray formation.
0.284615	0.638462	AT1G64930		CYTOCHROME P450, FAMILY 87, SUBFAMILY A, POLYPEPTIDE 7 (CYP89A7)	member of CYP89A
0.284674	0.451387	AT1G62570		FLAVIN-MONOOXYGENASE GLUCOSINOLATE S-OXYGENASE 4 (FMO GS-OX4)	belongs to the flavin-monooxygenase (FMO) family, encodes a glucosinolate S-oxygenase that catalyzes the conversion of methylthioalkyl glucosinolates to methylsulfinylalkyl glucosinolates The mRNA is cell-to-cell mobile.
0.285414	0.972718	AT3G04060	NAC046	NAC DOMAIN CONTAINING PROTEIN 46 (NAC046);NAC DOMAIN CONTAINING PROTEIN 46 (anac046)	NAC046 is a member of the NAC domain containing family of transcription factors. It was identified in a screen for regulators of chlorophyll protein gene expression. Mutants in NAC046 have delayed senescence and increased CHL content suggesting a role in regulation of senescence and chlorophyll degradation.
0.285714	0.842857	AT2G18480			Major facilitator superfamily protein;(source:Araport11)
0.285942	0.299735	AT2G42530	COR15B	COLD REGULATED 15B (COR15B)	Encodes COR15B, a protein that protects chloroplast membranes during freezing.
0.28697	0.604716	AT3G11550	CASP2	CASPARIAN STRIP MEMBRANE DOMAIN PROTEIN 2 (CASP2)	Uncharacterized protein family (UPF0497);(source:Araport11)
0.287253	0.600539	AT5G15850		CONSTANS-LIKE 1 (COL1);B-BOX DOMAIN PROTEIN 2 (BBX2); (ATCOL1)	Homologous to the flowering-time gene CONSTANS.
0.287356	0.174713	AT4G14630		GERMIN-LIKE PROTEIN 9 (GLP9)	germin-like protein with N-terminal signal sequence that may target it to the vacuole, plasma membrane and/or outside the cell. The mRNA is cell-to-cell mobile.
0.287671	0.616438	AT3G58190		ASYMMETRIC LEAVES 2-LIKE 16 (ASL16);LATERAL ORGAN BOUNDARIES-DOMAIN 29 (LBD29)	This gene contains two auxin-responsive element (AuxRE). Required for triggering cell reprogramming during callus formation.
0.287879	1.07576	AT3G32925			transposable_element_gene;(source:Araport11);non-LTR retrotransposon family (LINE), has a 3.1e-13 P-value blast match to GB:AAB41224 ORF2 (LINE-element) (Rattus norvegicus);(source:TAIR10)
0.288251	0.334699	AT5G42590	CYP71A16	MARNERAL OXIDASE (MRO);CYTOCHROME P450, FAMILY 71, SUBFAMILY A, POLYPEPTIDE 16 (CYP71A16)	putative cytochrome P450
0.288352	0.630682	AT1G30760		BERBERINE BRIDGE ENZYME-LIKE 13 (ATBBE-LIKE 13)	Encodes a BBE-like enzyme that acts in monolignol metabolism by catalyzing the oxidation of aromatic allylic alcohols, such as coumaryl-, sinapyl-, and coniferyl alcohol, to the corresponding aldehydes. The mRNA is cell-to-cell mobile.
0.288889	0.288889	AT2G08950			None;(source:Araport11)
0.289253	0.316232	AT5G13580	ABCG6	JASMONIC ACID TRANSPORTER 3 (JAT3);ATP-BINDING CASSETTE G6 (ABCG6)	Belongs to a clade of five Arabidopsis thaliana ABCG half-transporters that are required for synthesis of an effective suberin barrier in roots and seed coats (ABCG2, ABCG6, and ABCG20) and for synthesis of an intact pollen wall (ABCG1 and ABCG16). Phloem-expressed and plasma membrane-localized jasmonate transporter which together with JAT4 and GLR3.3 involved in regulating long-distance transloc…
0.289855	0.507246	AT4G03480			Ankyrin repeat family protein;(source:Araport11)
0.289855	0.347826	AT4G13900		RECEPTOR LIKE PROTEIN 49 (RLP49);RECEPTOR LIKE PROTEIN 49 (AtRLP49)	pseudogene of receptor like protein 47;(source:Araport11)
0.29	0.33	AT1G02390		GLYCEROL-3-PHOSPHATE SN-2-ACYLTRANSFERASE 2 (ATGPAT2);GLYCEROL-3-PHOSPHATE SN-2-ACYLTRANSFERASE 2 (GPAT2)	putative sn-glycerol-3-phosphate 2-O-acyltransferase
0.290351	0.33686	AT4G17460	HAT1	JAIBA (JAB); (HAT1)	Encodes a class II HD-ZIP protein that regulates meristematic activity in different tissues, and that it is necessary for the correct formation of the gynoecium.
0.290995	0.508065	AT1G12740		CYTOCHROME P450, FAMILY 87, SUBFAMILY A, POLYPEPTIDE 2 (CYP87A2)	encodes a protein with cytochrome P450 domain
0.291304	1.08261	AT3G56230			BTB/POZ domain-containing protein;(source:Araport11)
0.291971	0.240876	AT1G73810			Core-2/I-branching beta-1,6-N-acetylglucosaminyltransferase family protein;(source:Araport11)
0.292683	0.64547	AT4G02090			PADRE protein.
0.294082	0.40526	AT4G31380		FPF1-LIKE PROTEIN 1 (FLP1)	encodes a small protein with unknown function and is similar to flower promoting factor 1. This gene is not expressed in apical meristem after floral induction but is expressed in roots, flowers, and in low abundance, leaves.
0.296951	0.642432	AT5G39580	PRX62	(PRX62)	Class III peroxidase cell wall-targeted protein localized to the micropylar endosperm facing the radicle. Involved in seed germination.
0.297297	0.810811	AT3G09985			Natural antisense transcript overlaps with AT3G63490;(source:Araport11)
0.297511	0.560648	AT2G36800		DON-GLUCOSYLTRANSFERASE 1 (DOGT1);UDP-GLUCOSYL TRANSFERASE 73C5 (UGT73C5)	Encodes a DON-Glucosyltransferase. The UGT73C5 glucosylates both brassinolide and castasterone in the 23-O position. The enzyme is presumably involved in the homeostasis of those steroid hormones hence regulating BR activity. Transgenic plants overexpressing UGT73C5 show a typical BR-deficient phenotype.
0.297545	0.564025	AT5G52310	LTI78,RD29A	COLD REGULATED 78 (COR78);LOW-TEMPERATURE-INDUCED 78 (LTI78); (LTI140);RESPONSIVE TO DESICCATION 29A (RD29A)	cold regulated gene, the 5' region of cor78 has cis-acting regulatory elements that can impart cold-regulated gene expression The mRNA is cell-to-cell mobile.
0.298246	0.298246	AT1G77960			repressor ROX1-like protein;(source:Araport11)
0.298701	0.688312	AT2G45800		PLIM2A (PLIM2a)	Encodes a member of the Arabidopsis LIM proteins: a family of actin bundlers with distinct expression patterns. WLIM1, WLIM2a, and WLIM2b are widely expressed, whereas PLIM2a, PLIM2b, and PLIM2c are predominantly expressed in pollen. Regulates actin cytoskeleton organization.
0.299441	0.418685	AT5G17820	PER57	PEROXIDASE 57 (PER57)	Peroxidase superfamily protein, overexpression increases ROS.
0.299619	0.77662	AT3G16800	PP2C41,EGR3	E GROWTH-REGULATING 3 (EGR3)	EGR3 functions as a negative regulator of plant growth with prominent effect on plant growth during drought stress, EGR3 regulates microtubule organization and likely affects additional cytoskeleton and trafficking processes along the plasma membrane.
0.3	0.733333	AT2G45130		ARABIDOPSIS THALIANA SPX DOMAIN GENE 3 (ATSPX3);SPX DOMAIN GENE 3 (SPX3)	Expression is upregulated in the shoot of cax1/cax3 mutant.
0.3	1.07647	AT2G25160		CYTOCHROME P450, FAMILY 82, SUBFAMILY F, POLYPEPTIDE 1 (CYP82F1)	cytochrome P450, family 82, subfamily F, polypeptide 1;(source:Araport11)
0.3	0.766667	AT2G03540			transposable_element_gene;(source:Araport11);similar to unknown protein [Arabidopsis thaliana] (TAIR:AT4G11710.1);(source:TAIR10)
0.300699	0.29021	AT1G13520			hypothetical protein (DUF1262);(source:Araport11)
0.301001	0.571079	AT1G64780		AMMONIUM TRANSPORTER 1;2 (AMT1;2);AMMONIUM TRANSPORTER 1;2 (ATAMT1;2)	encodes an ammonium transporter protein believed to act as a high affinity transporter. It is expressed in the root, primarily in endodermal and cortical cells, and contributes to ammonium uptake in the root.
0.302326	1.02326	AT1G24620	CML25	CALMODULIN LIKE 25 (CML25)	Encodes a EF-hand calcium-binding protein family member. Mutants exhibit longer root hairs under phosphate-deficient conditions.
0.302564	0.923077	AT5G42785			transmembrane protein;(source:Araport11)
0.302867	0.883513	AT2G35738			Natural antisense transcript overlaps with AT2G35740;(source:Araport11)
0.30303	0.434343	AT1G04133			None;(source:Araport11)
0.305085	0.59322	AT1G50190			Cysteine/Histidine-rich C1 domain family protein;(source:Araport11)
0.305266	0.621205	AT1G61590	PBL15	SCHENGEN1 (SGN1);PBS1-LIKE 15 (PBL15)	Protein kinase superfamily protein;(source:Araport11)
0.306203	1.04443	AT1G09240		ARABIDOPSIS THALIANA NICOTIANAMINE SYNTHASE 3 (ATNAS3);NICOTIANAMINE SYNTHASE 3 (NAS3)	Encodes a nicotianamine synthase.
0.306584	0.468447	AT3G55230			Disease resistance-responsive (dirigent-like protein) family protein;(source:Araport11)
0.307692	0.632479	AT3G29410	TPS25	TERPENE SYNTHASE 25 (TPS25)	Terpenoid cyclases/Protein prenyltransferases superfamily protein;(source:Araport11)
0.307692	0.358974	AT2G45410		LOB DOMAIN-CONTAINING PROTEIN 19 (LBD19)	LOB domain-containing protein 19;(source:Araport11)
0.308271	0.37782	AT4G23200		CYSTEINE-RICH RLK (RECEPTOR-LIKE PROTEIN KINASE) 12 (CRK12)	Encodes a cysteine-rich receptor-like protein kinase.
0.308721	0.644812	AT3G62270		REQUIRES HIGH BORON 2 (BOR2)	BOR2 is involved in efficient borate crosslinking of rhamnogalacturonan II in cell walls under boron limitation.
0.308998	0.438031	AT5G64190			neuronal PAS domain protein;(source:Araport11)
0.309091	1.21818	AT4G21745			PAK-box/P21-Rho-binding family protein;(source:Araport11)
0.309852	0.400286	AT1G20160	SBT5.2	(ATSBT5.2); (SBT5.2(A));CO2 RESPONSE SECRETED PROTEASE (CRSP)	Encodes two isoforms. One (SBT5.2(a) ) is a secreted, cell wall localized subtilisin-like serine protease that is involved in regulation of stomatal development. The second isoform (SBT5.2(b) is localized to endosomes.
0.310811	0.702703	AT2G36770			UDP-Glycosyltransferase superfamily protein;(source:Araport11)
0.311475	0.377049	AT1G03790	SOM	SOMNUS (SOM);TANDEM CCCH ZINC FINGER PROTEIN 4 (TZF4); (ATTZF4)	Encodes SOMNUS (SOM), a nucleus-localized CCCH-type zinc finger protein. SOM negatively regulates light-dependent seed germination downstream of PIL5 (AT2G20180).
0.3125	0.6875	AT3G59730		L-TYPE LECTIN RECEPTOR KINASE V.6 (LECRK-V.6)	Concanavalin A-like lectin protein kinase family protein;(source:Araport11)
0.3125	0.5	AT5G08990			Natural antisense transcript overlaps with AT5G61210;(source:Araport11)
0.313793	1.45172	AT5G28030	DES1	L-CYSTEINE DESULFHYDRASE 1 (DES1)	Encodes a novel l-cysteine desulfhydrase involved in cysteine homeostasis that catalyzes the desulfuration of Cys, instead of the synthesis of Cys like the OASTL, to produce sulfide plus ammonia and pyruvate.
0.314286	0.525974	AT4G00080		UNFERTILIZED EMBRYO SAC 11 (UNE11)	Plant invertase/pectin methylesterase inhibitor superfamily protein;(source:Araport11)
0.314384	0.745909	AT1G67030	ZFP6	ZINC FINGER PROTEIN 6 (ZFP6)	Encodes a novel C2H2 zinc finger protein containing only a single zinc finger which plays a key role in regulating trichome development by integrating GA and cytokinin signaling. The mRNA is cell-to-cell mobile.
0.314456	0.317272	AT1G69490	NAP	ARABIDOPSIS NAC DOMAIN CONTAINING PROTEIN 29 (ANAC029);NAC-LIKE, ACTIVATED BY AP3/PI (NAP);NAC-LIKE, ACTIVATED BY AP3/PI (ATNAP)	Encodes a member of the NAC transcription factor gene family. It is expressed in floral primordia and upregulated by AP3 and PI. Its expression is associated with leaf senescence. The mRNA is cell-to-cell mobile.
0.314655	0.400862	AT1G01250			encodes a member of the DREB subfamily A-4 of ERF/AP2 transcription factor family. The protein contains one AP2 domain. There are 17 members in this subfamily including TINY.
0.315476	1.08036	AT3G45700		NITRATE EXCRETION TRANSPORTER (NPF2.4)	NPF2.4 is a member of the NAXT NPF subfamily. It encodes a plasmamembrane localized chloride transporter that is expressed in the root and is down regulated in response to ABA and salt treatment. NPF2.3 miRNA induced knockdowns have less Cl in the shoots when grown on low NaCl concentrations.
0.315516	0.573949	AT5G04190		PHYTOCHROME KINASE SUBSTRATE 4 (PKS4)	Encodes phytochrome kinase substrate 4, a phytochrome signaling component involved in phototropism. It is phosphorylated in a phot1-dependent manner in vitro. Phosphorylation is transient and regulated by a type 2- protein phosphatase.
0.315534	0.538835	AT2G18010		SMALL AUXIN UPREGULATED RNA 10 (SAUR10)	SAUR-like auxin-responsive protein family;(source:Araport11)
0.315642	0.631285	AT1G43020			electron protein, putative (Protein of unknown function, DUF547);(source:Araport11)
0.315789	0.0789474	AT3G13540	MYB5	MYB DOMAIN PROTEIN 5 (ATMYB5);MYB DOMAIN PROTEIN 5 (MYB5);ABC TRANSPORTER OF THE MITOCHONDRION 2 (ATM2)	Encodes a member of the MYB family of transcriptional regulators. MYB5 act as a negative regulator of trichome branching and play a role in the correct formation of the seed coat and possibly the formation the underlying endosperm layers. Loss of function mutations have defects in seed coat mucilage and columella cells as well as trichome defects (smaller and reduced number of branches).
0.317073	0.146341	AT1G25430			transposable_element_gene;(source:Araport11);non-LTR retrotransposon family (LINE), has a 8.0e-45 P-value blast match to GB:NP_038607 L1 repeat, Tf subfamily, member 9 (LINE-element) (Mus musculus);(source:TAIR10)
0.31734	0.541226	AT5G07010		SULFOTRANSFERASE 2A (ST2A);ARABIDOPSIS THALIANA SULFOTRANSFERASE 2A (ATST2A)	Encodes a sulfotransferase that acts specifically on 11- and 12-hydroxyjasmonic acid. Transcript levels for this enzyme are increased by treatments with jasmonic acid (JA), 12-hydroxyJA, JA-isoleucine, and 12-oxyphytodienoic acid (a JA precursor).
0.31739	0.443341	AT5G49730	FRO6	FERRIC REDUCTION OXIDASE 6 (ATFRO6);FERRIC REDUCTION OXIDASE 6 (FRO6); (FRO6)	Encodes a plasma membrane-located ferric chelate reductase. Its mRNA is expressed in green aerial tissues (shoot, flower and cotyledon) in a light- and cell differentiation-specific manner.
0.31746	0.857143	AT1G09500			similar to Eucalyptus gunnii alcohol dehydrogenase of unknown physiological function (GI:1143445), Vigna unguiculata (gi:1854445), NOT a cinnamyl-alcohol dehydrogenase
0.317665	0.428355	AT3G20380			TRAF-like family protein;(source:Araport11)
0.318182	0.681818	AT1G26590			C2H2-like zinc finger protein;(source:Araport11)
0.318182	0.722222	AT3G14260			LURP-one-like protein (DUF567);(source:Araport11)
0.319149	1.08511	AT1G68800	TCP12	TCP DOMAIN PROTEIN 12 (TCP12);BRANCHED 2 (BRC2)	Encodes a TCP transcription factor, closely related to teosinte branched1, arrests axillary bud development and prevents axillary bud outgrowth. Transcription level and mutant phenotype are weaker than its homolog BRC1 (At3G18550).
0.319843	0.420366	AT5G09520	PELPK2	PRO-GLU-LEU|ILE|VAL-PRO-LYS 2 (PELPK2)	hydroxyproline-rich glycoprotein family protein;(source:Araport11)
0.32	0.44	AT1G07795			forkhead box protein G1;(source:Araport11)
0.32	0.826667	AT5G24150	SQP1	SQUALENE MONOOXYGENASE 5 (SQE5); (SQP1)	squalene monooxygenase gene homolog
0.321101	0.53211	AT1G19160			F-box family protein;(source:Araport11)
0.321101	0.911315	AT5G15600		SPIRAL1-LIKE4 (SP1L4)	SPIRAL1-LIKE4 belongs to a six-member gene family in Arabidopsis; all members share high sequence similarity in amino- and carboxy-terminal regions. Regulates cortical microtubule organization. Mutant plants exhibit altered patterns of root, leaf and petal growth as a result of defective anisotropic cell expansion.
0.321188	0.867746	AT3G61270			O-glucosyltransferase rumi-like protein (DUF821);(source:Araport11)
0.321429	1	AT1G03165			hypothetical protein;(source:Araport11)
0.322368	0.598684	AT3G03700			Plasma-membrane choline transporter family protein;(source:Araport11)
0.322785	0.506329	AT4G14390			Ankyrin repeat family protein;(source:Araport11)
0.323832	0.535234	AT4G12290		COPPER AMINE OXIDASE (CUAO)	Copper amine oxidase. Induced by ABA and involved in stomatal closure.
0.324786	0.523504	AT3G01175			transmembrane protein;(source:Araport11)
0.324896	0.637296	AT4G26010	PER44		Peroxidase superfamily protein;(source:Araport11)
0.324967	0.298547	AT2G39380		EXOCYST SUBUNIT EXO70 FAMILY PROTEIN H2 (ATEXO70H2);EXOCYST SUBUNIT EXO70 FAMILY PROTEIN H2 (EXO70H2)	A member of EXO70 gene family, putative exocyst subunits, conserved in land plants. Arabidopsis thaliana contains 23 putative EXO70 genes, which can be classified into eight clusters on the phylogenetic tree.
0.325301	0.777108	AT3G21420		LATERAL BRANCHING OXIDOREDUCTASE 1 (LBO1)	LATERAL BRANCHING OXIDOREDUCTASE (LBO), encodes an oxidoreductase-like enzyme of the 2-oxoglutarate and Fe(II)-dependent dioxygenase superfamily. It is involved in the biosynthesis of strigolactones.
0.325829	0.638503	AT1G72610		GERMIN-LIKE PROTEIN 1 (GLP1);GERMIN-LIKE PROTEIN 1 (GER1);A. THALIANA GERMIN-LIKE PROTEIN 1 (ATGER1)	germin-like protein (GLP1)
0.326316	0.6	AT4G08450			Disease resistance protein (TIR-NBS-LRR class) family;(source:Araport11)
0.326843	0.283264	AT5G66400	RAB18	ARABIDOPSIS THALIANA DROUGHT-INDUCED 8 (ATDI8);RESPONSIVE TO ABA 18 (RAB18)	Belongs to the dehydrin protein family, which contains highly conserved stretches of 7-17 residues that are repetitively scattered in their sequences, the K-, S-, Y- and lysine rich segments. ABA- and drought-induced glycine-rice dehydrin protein. The ABA-induced expression of RAB18 was reduced following ACC application, indicating that ethylene inhibits the ABA signaling pathway. RAB18 is also e…
0.327684	0.446328	AT2G37430	ZAT11	ZINC FINGER OF ARABIDOPSIS THALIANA 11 (ZAT11)	Encodes a member of the zinc finger family of transcriptional regulators. It is expressed in many root tips, primary roots, cotyledons and hypocotyl. The protein is localized to the nucleus. Overexpression of ZAT11 causes increased root growth and increased sensitivity to nickel ions. The mRNA is cell-to-cell mobile.
0.32821	0.552376	AT5G42180	PER64	(PRX64);PEROXIDASE 64 (PER64)	Peroxidase required for casparian strip lignification as well as partially required for SGN-dependent compensatory lignification.
0.328244	0.656489	AT1G04467			Natural antisense transcript overlaps with AT1G06460;(source:Araport11)
0.328638	1.02347	AT1G45015			MD-2-related lipid recognition domain-containing protein;(source:Araport11)
0.328704	0.550926	AT5G42655			Disease resistance-responsive (dirigent-like protein) family protein;(source:Araport11)
0.329855	0.555028	AT4G13580			Disease resistance-responsive (dirigent-like protein) family protein;(source:Araport11)
0.330882	0.639706	AT5G24910		EUI-LIKE P450 A1 (ELA1);CYTOCHROME P450, FAMILY 714, SUBFAMILY A, POLYPEPTIDE 1 (CYP714A1)	Member of CYP714A. Encodes one of the two tandemly duplicated gene pair ELA1 (CYP714A1) and ELA2 (CYP714A2), homologs of the rice cytochrome P450 monooxygenase gene EUI1. Double mutation of ELA1 and ELA2 results in increased biomass and enlarged organs.
0.331633	0.755102	AT3G07600			Heavy metal transport/detoxification superfamily protein;(source:Araport11)
0.332926	0.642748	AT1G71030		MYB-LIKE 2 (MYBL2);ARABIDOPSIS MYB-LIKE 2 (ATMYBL2)	Encodes a putative myb family transcription factor. In contrast to most other myb-like proteins its myb domain consists of a single repeat. A proline-rich region potentially involved in transactivation is found in the C-terminal part of the protein. Its transcript accumulates mainly in leaves.
0.333333	1.17333	AT2G37530			forkhead box protein G1;(source:Araport11)
0.333333	0.984127	AT5G56200			Encodes a transcription factor expressed in the female gametophyte.
0.333333	2.29167	AT1G53080			Legume lectin family protein;(source:Araport11)
0.333333	0.242424	AT2G21780			hypothetical protein;(source:Araport11)
0.333333	1.16667	AT3G56780			FBD, F-box and Leucine Rich Repeat domains containing protein;(source:Araport11)
0.333333	0.612613	AT4G39700		HEAVY METAL ASSOCIATED PROTEIN 41 (ATHMP41)	Heavy metal transport/detoxification superfamily protein;(source:Araport11)
0.333333	0.266667	AT4G28110	MYB41	MYB DOMAIN PROTEIN 41 (MYB41);MYB DOMAIN PROTEIN 41 (AtMYB41)	Member of the R2R3 factor gene family. Expression is induced in response to desiccation, ABA and salt treatment. Overexpression of Myb41 results in abnormal cuticle development and decreased cell expansion.
0.333333	0.593359	AT3G22620		GLYCOSYLPHOSPHATIDYLINOSITOL-ANCHORED LIPID PROTEIN TRANSFER 20 (LTPG20)	Bifunctional inhibitor/lipid-transfer protein/seed storage 2S albumin superfamily protein;(source:Araport11)
0.333791	0.706017	AT3G24300		AMMONIUM TRANSPORTER 1;3 (ATAMT1;3);AMMONIUM TRANSPORTER 1;3 (AMT1;3)	Encodes a plasma membrane localized ammonium transporter.
0.334802	0.700441	AT3G45840			Cysteine/Histidine-rich C1 domain family protein;(source:Araport11)
0.335793	0.639606	AT2G21100			Disease resistance-responsive (dirigent-like protein) family protein;(source:Araport11)
0.336209	0.32338	AT4G26530		FRUCTOSE-BISPHOSPHATE ALDOLASE 5 (FBA5); (ATFBA5); (DEG22)	Aldolase superfamily protein;(source:Araport11)
0.336323	0.843049	AT4G00460	ROPGEF3	ROP (RHO OF PLANTS) GUANINE NUCLEOTIDE EXCHANGE FACTOR 3 (ROPGEF3); (ATROPGEF3)	Encodes a member of KPP-like gene family, homolog of KPP (kinase partner protein) gene in tomato. Also a member of the RopGEF (guanine nucleotide exchange factor) family, containing the novel PRONE domain (plant-specific Rop nucleotide exchanger), which is exclusively active towards members of the Rop subfamily.
0.336508	0.426984	AT1G53890			LURP-one-like protein (DUF567);(source:Araport11)
0.336761	0.634961	AT5G58010		DEFECTIVE REGION OF POLLEN 3 (DROP3);LJRHL1-LIKE 3 (LRL3)	Encodes a basic helix-loop-helix (bHLH) protein that regulates root hair development. One of the three Arabidopsis homologs of the Lotus japonicus ROOTHAIRLESS1 (LjRHL1) gene: At2g24260 (AtLRL1), At4g30980 (AtLRL2), and At5g58010 (AtLRL3).
0.337197	0.825088	AT2G37750			hypothetical protein;(source:Araport11)
0.338242	0.816843	AT2G28110	FRA8,IRX7	IRREGULAR XYLEM 7 (IRX7);FRAGILE FIBER 8 (FRA8)	Homolog to AT5G22940, a member of glycosyltransferase family 47 that is involved in secondary cell wall biosynthesis. It exhibits high sequence similarity to tobacco (Nicotiana plumbaginifolia) pectin glucuronyltransferase. Protein has a domain that shares significant similarity with the pfam03016 domain. It is expressed specifically in developing vessels and fiber cells, and FRA8 is targeted to …
0.338462	0.530769	AT4G38340	NLP3	NIN-LIKE PROTEIN 3 (NLP3)	Chip-seq data indicates bZIP1 binds to the NLP3 promoter.
0.339009	0.318885	AT1G08430		ARABIDOPSIS THALIANA ALUMINUM-ACTIVATED MALATE TRANSPORTER 1 (ATALMT1);ALUMINUM-ACTIVATED MALATE TRANSPORTER 1 (ALMT1)	Encodes a Al-activated malate efflux transporter. It is essential for aluminum tolerance but does not represent the major Al tolerance QTL. Staurosporine and calyculin A both block all changes in AtALMT1 gene expression (as a result malate release is totally inhibited). AtALMT1 transcription was clearly induced by indole-3-acetic acid, abscisic acid, low pH, hydrogen peroxide and flg22. STOP1 and…
0.339286	0.339286	AT5G65980		PIN-LIKES 7 (PILS7)	Auxin efflux carrier family protein;(source:Araport11)
0.339513	0.976825	AT2G31980		PHYTOCYSTATIN 2 (CYS2);PHYTOCYSTATIN 2 (AtCYS2)	PHYTOCYSTATIN 2;(source:Araport11)
0.33957	0.323667	AT1G68620	CXE6		alpha/beta-Hydrolases superfamily protein;(source:Araport11)
0.340136	0.293564	AT3G22800			Leucine-rich repeat (LRR) family protein;(source:Araport11)
0.340164	0.393443	AT4G12270			Copper amine oxidase family protein;(source:Araport11)
0.340659	0.612637	AT1G52890	NAC019	(ANAC19);NAC DOMAIN CONTAINING PROTEIN 19 (NAC019);NAC DOMAIN CONTAINING PROTEIN 19 (ANAC019)	encodes a NAC transcription factor whose expression is induced by drought, high salt, and abscisic acid. This gene binds to ERD1 promoter in vitro.
0.340845	0.864789	AT5G54230	MYB49	MYB DOMAIN PROTEIN 49 (AtMYB49);MYB DOMAIN PROTEIN 49 (MYB49)	MYB49 transcription factor. Binds to and promotes expression of genes involved in cadmium accumulation. Interacts with ABI5 which acts as a repressor preventing MYB49 induced expression of target genes.
0.341357	0.410821	AT3G21330			basic helix-loop-helix (bHLH) DNA-binding superfamily protein;(source:Araport11)
0.342553	0.647447	AT4G00750			S-adenosyl-L-methionine-dependent methyltransferases superfamily protein;(source:Araport11)
0.342857	0.428571	ArthCp032
0.342898	0.685796	AT1G71740			nucleolar protein;(source:Araport11)
0.342993	0.416808	AT4G14130	XTH15	XYLOGLUCAN ENDOTRANSGLUCOSYLASE/HYDROLASE 15 (XTH15);XYLOGLUCAN ENDOTRANSGLYCOSYLASE 7 (XTR7)	xyloglucan endotransglycosylase-related protein (XTR7)
0.343049	0.827354	AT1G24148			hypothetical protein;(source:Araport11)
0.343251	0.34202	AT4G02890	UBQ14	(UBQ14)	Polyubiquitin gene containing 4 ubiquitin repeats.
0.34375	0.84375	AT1G74675			transmembrane protein;(source:Araport11)
0.34384	0.30659	AT5G06090		GLYCEROL-3-PHOSPHATE SN-2-ACYLTRANSFERASE 7 (ATGPAT7);GLYCEROL-3-PHOSPHATE SN-2-ACYLTRANSFERASE 7 (GPAT7)	putative sn-glycerol-3-phosphate 2-O-acyltransferase
0.344136	0.58179	AT5G26310	UGT72E3	(UGT72E3)	UGT72E3 is an UDPG:coniferyl alcohol glucosyltransferase which glucosylates sinapyl- and coniferyl alcohol as well as sinapic acid. The enzyme is thought to be involved in lignin- and phenylpropanoid metabolism. A knockdown mutant line (72E3KD) was obtained using RNAi silencing. No reduction in coniferyl alcohol 4-<i>O</i>-glucoside and sinapyl alcohol 4-<i>O</i>-glucoside was detected in this li…
0.345291	1.24215	AT4G28790			basic helix-loop-helix (bHLH) DNA-binding superfamily protein;(source:Araport11)
0.345311	0.561788	AT2G25260		HYDROXYPROLINE O-ARABINOSYLATRANSFERASE 2 (HPAT2)	Hyp O-arabinosyltransferase-like protein;(source:Araport11)
0.345324	0.546763	AT2G14960	GH3.1	(GH3.1)	encodes a protein similar to IAA-amido synthases. Lines carrying an insertion in this gene are hypersensitive to auxin.
0.345711	0.533931	AT3G50400			GDSL-motif esterase/acyltransferase/lipase. Enzyme group with broad substrate specificity that may catalyze acyltransfer or hydrolase reactions with lipid and non-lipid substrates.
0.345794	0.728972	AT4G10020		HYDROXYSTEROID DEHYDROGENASE 5 (HSD5);HYDROXYSTEROID DEHYDROGENASE 5 (AtHSD5)	Encodes a putative hydroxysteroid dehydrogenase (HSD). Genes that encode HSD include: At5g50600 and At5g50700 (HSD1), At3g47350(HSD2), At3g47360(HSD3), At5g50590 and At5g50690(HSD4), At5g50770(HSD6) (Plant Cell Physiology 50:1463). Two copies of HSD1 and HSD4 exist due to a gene duplication event. In Plant Physiology 145:87, At5g50690 is HSD7, At4g10020 is HSD5.
0.346154	1.42308	AT5G02865			None;(source:Araport11)
0.346341	0.694634	AT2G45750			S-adenosyl-L-methionine-dependent methyltransferases superfamily protein;(source:Araport11)
0.346774	0.302419	AT1G51090	HMAD1	HEAVY METAL ASSOCIATED PROTEIN 9 (ATHMP09); (ATHMAD1)	Heavy metal associated domain containing protein involved in plant immunity.Mutants show an increase in root length under NO stress and reduction in root length under H2O2 stress conditions. Mutants show increases in defense responses to pathogens including hypersensitive lesions, increased resistance and induction of SAR genes.
0.347349	0.579525	AT2G28990			Leucine-rich repeat protein kinase family protein;(source:Araport11)
0.347458	0.242373	AT2G37030		SMALL AUXIN UPREGULATED RNA 46 (SAUR46)	SAUR-like auxin-responsive protein family;(source:Araport11)
0.347718	0.522822	AT2G15390	FUT4	(atfut4);FUCOSYLTRANSFERASE 4 (FUT4)	Encodes an alpha-(1,2)-fucosyltransferase.
0.348066	0.622468	AT1G30750			TPRXL;(source:Araport11)
0.348256	0.839535	AT5G44210		ERF DOMAIN PROTEIN 9 (ATERF9);ERF DOMAIN PROTEIN- 9 (ATERF-9);ERF DOMAIN PROTEIN 9 (ERF9)	encodes a member of the ERF (ethylene response factor) subfamily B-1 of ERF/AP2 transcription factor family (ATERF-9). The protein contains one AP2 domain. There are 15 members in this subfamily including ATERF-3, ATERF-4, ATERF-7, and leafy petiole.
0.348376	0.770186	AT5G26340	MSS1	(MSS1);SUGAR TRANSPORT PROTEIN 13 (ATSTP13);SUGAR TRANSPORT PROTEIN 13 (STP13)	Encodes a protein with high affinity, hexose-specific/H+ symporter activity. The activity of the transporter appears to be negatively regulated by phosphorylation. Importantly, microarray analysis, as well as the study of the expression of this gene in mutants involved in programmed cell death (PCD) demonstrated a tight correlation between this gene's expression and PCD.
0.348485	0.94697	AT2G25240		SERPIN5 (SERP5); (ATCCP3);CONSERVED IN CILIATED SPECIES AND IN THE LAND PLANTS 3 (CCP3)	Serine protease inhibitor (SERPIN) family protein;(source:Araport11). Involved in stress response regulated cell death.
0.348774	0.435059	AT3G56410			hypothetical protein (DUF3133);(source:Araport11)
0.349229	0.486676	AT1G70170		(AT2-MMP);MATRIX METALLOPROTEINASE (MMP)	mutant has Late flowering; Early senescence; Matrix Metalloproteinase
0.349847	0.449183	AT4G24050			NAD(P)-binding Rossmann-fold superfamily protein;(source:Araport11)
0.351351	0.448649	AT1G55420		EMBRYO SAC DEVELOPMENT ARREST 11 (EDA11)	Cysteine/Histidine-rich C1 domain family protein;(source:Araport11)
0.351481	1.14296	AT3G04070		NAC DOMAIN CONTAINING PROTEIN 47 (anac047);NAC DOMAIN CONTAINING PROTEIN 47 (NAC047);SPEEDY HYPONASTIC GROWTH (SHG);SPEEDY HYPONASTIC GROWTH (SHYG)	NAC domain containing protein 47;(source:Araport11)
0.351585	1.40922	AT4G18830		OVATE FAMILY PROTEIN 5 (OFP5); (ATOFP5)	Member of the ovate protein family.Interacts with BLH1 and KNAT3. Regulates the subcellular localization of BLH1.I May also directly affect microtubule organization via interactions with TON2.
0.351852	0.333333	AT5G50260		CYSTEINE ENDOPEPTIDASE 1 (CEP1)	Encodes a papain-like cysteine protease involved in tapetal programmed cell death and pollen development.CEP1 is expressed specifically in the tapetum from stages 5 to 11 of anther development. The CEP1 protein first appears as a proenzyme in precursor protease vesicles, and is then transported to the vacuole and transformed into the mature enzyme before rupture of the vacuole. CEP1 was also rele…
0.352941	0.558824	AT1G76430		PHOSPHATE TRANSPORTER 1;9 (PHT1;9)	Encodes Pht1;9, a member of the Pht1 family of phosphate transporters which include: Pht1;1/At5g43350, Pht1;2/At5g43370, Pht1;3/At5g43360, Pht1;4/At2g38940, Pht1;5/At2g32830, Pht1;6/At5g43340, Pht1;7/At3g54700, Pht1;8/At1g20860, Pht1;9/At1g76430 (Plant Journal 2002, 31:341).
0.353247	0.127273	AT3G21520		ARABIDOPSIS THALIANA DUF679 DOMAIN MEMBRANE PROTEIN 1 (AtDMP1);DUF679 DOMAIN MEMBRANE PROTEIN 1 (DMP1)	Encodes a protein is directly or indirectly involved in membrane fission during breakdown of the ER and the tonoplast during leaf senescence and in membrane fusion during vacuole biogenesis in roots. The mRNA is cell-to-cell mobile.
0.353535	0.575758	AT5G40010	AATP1	ATPASE-IN-SEED-DEVELOPMENT (ASD);AAA-ATPASE 1 (AATP1)	Encodes a mitochondrial ATPase involved in seed and silique development.
0.354232	0.858934	AT1G08670			ENTH/VHS family protein;(source:Araport11)
0.354586	0.643008	AT4G37390	BRU6	AUXIN UPREGULATED 3 (AUR3);YADOKARI 1 (YDK1); (GH3.2); (BRU6); (GH3-2)	Encodes an IAA-amido synthase that conjugates Asp and other amino acids to auxin in vitro. Lines carrying insertions in this gene are hypersensitive to auxin. May function as a negative component in auxin signaling by regulating auxin activity.
0.354999	0.371456	AT4G27260	WES1	(WES1); (GH3.5)	encodes an IAA-amido synthase that conjugates Asp and other amino acids to auxin in vitro. Lines carrying insertions in this gene are hypersensitive to auxin. It is involved in camalexin biosynthesis via conjugating indole-3-carboxylic acid (ICA) and cysteine (Cys). The mRNA is cell-to-cell mobile.
0.355003	0.577579	AT5G62280			DUF1442 family protein (DUF1442);(source:Araport11)
0.355159	0.854559	AT3G26290		CYTOCHROME P450, FAMILY 71, SUBFAMILY B, POLYPEPTIDE 26 (CYP71B26)	putative cytochrome P450
0.355164	0.43199	AT1G51840		STRESS INDUCED FACTOR 1 (SIF1)	kinase-like protein;(source:Araport11)
0.355462	0.445798	AT2G46750		(ATGULLO2);L -GULONO-1,4-LACTONE ( L -GULL) OXIDASE 2 (GULLO2)	Encodes a homolog of rat L-gulono-1,4-lactone (L-GulL) oxidase that is involved in the biosynthesis of L-ascorbic acid.
0.355493	0.443454	AT2G22510			hydroxyproline-rich glycoprotein family protein;(source:Araport11)
0.357143	0.660714	AT1G61230			Mannose-binding lectin superfamily protein;(source:Araport11)
0.357895	0.505263	AT4G17470			alpha/beta-Hydrolases superfamily protein;(source:Araport11)
0.358156	0.346505	AT3G28220			TRAF-like family protein;(source:Araport11)
0.358412	0.488397	AT5G43450			encodes a protein whose sequence is similar to ACC oxidase
0.358974	0.777778	AT3G28270	AFL1	AT14A-LIKE1 (AFL1)	AFL1 was first identified by immunoscreening an Arabidopsis expression library with antisera recognizing mammalian &#946;1-integrin. It is a peripheral membrane protein associated with endomembranes and plasmamembrane. Based on overexpression and knockdown phenotypes, AFL1 is postulated to function in regulation of growth and proline accumulation in response to drought. AFL1 protein co-localizes …
0.359705	0.953149	AT3G26180		CYTOCHROME P450, FAMILY 71, SUBFAMILY B, POLYPEPTIDE 20 (CYP71B20)	putative cytochrome P450
0.360162	0.800557	AT3G22240		CYSTEINE-RICH TRANSMEMBRANE MODULE 9 (ATHCYSTM9)	cysteine-rich/transmembrane domain PCC1-like protein;(source:Araport11)
0.360179	0.894855	AT3G56080			S-adenosyl-L-methionine-dependent methyltransferases superfamily protein;(source:Araport11)
0.360472	0.370745	AT5G65730	XTH6	XYLOGLUCAN ENDOTRANSGLUCOSYLASE/HYDROLASE 6 (XTH6)	xyloglucan endotransglucosylase/hydrolase 6;(source:Araport11)
0.360533	0.478	AT4G38080			hydroxyproline-rich glycoprotein family protein;(source:Araport11)
0.361111	0	AT1G03390			HXXXD-type acyl-transferase family protein;(source:Araport11)
0.361522	0.594465	AT5G01740			Unknown gene, induced by abiotic stress treatments.
0.362637	0.142857	AT4G15300		CYTOCHROME P450, FAMILY 702, SUBFAMILY A, POLYPEPTIDE 2 (CYP702A2)	cytochrome P450, family 702, subfamily A, polypeptide 2;(source:Araport11)
0.362754	0.549188	AT4G19170	NCED4	NINE-CIS-EPOXYCAROTENOID DIOXYGENASE 4 (NCED4);CAROTENOID CLEAVAGE DIOXYGENASE 4 (CCD4)	chloroplast-targeted member of a family of enzymes similar to nine-cis-epoxycarotenoid dioxygenase The mRNA is cell-to-cell mobile.
0.363585	0.569484	AT5G22890		SENSITIVE TO PROTON RHIZOTOXICITY 2 (STOP2)	An unique homologue of STOP1 (AT1G34370) in Arabidopsis genome. Transformation to the stop1-mutant activated several genes that are regulated by STOP1, and conferred proton sensitive phenotype.
0.363755	0.671905	AT4G16780	HB-2,HAT4	HOMEOBOX PROTEIN 2 (ATHB-2);HOMEOBOX PROTEIN 2 (HB-2);ARABIDOPSIS THALIANA HOMEOBOX PROTEIN 2 (ATHB2); (HAT4)	Encodes a homeodomain-leucine zipper protein that is rapidly and strongly induced by changes in the ratio of red to far-red light. It is also involved in cell expansion and cell proliferation and in the response to auxin. The mRNA is cell-to-cell mobile.
0.363844	0.28833	AT3G19430			late embryogenesis abundant protein-related / LEA protein-like protein;(source:Araport11)
0.3644	0.88581	AT4G30670			Putative membrane lipoprotein;(source:Araport11)
0.364929	0.7109	AT1G66470	RHD6	ROOT HAIR DEFECTIVE6 (RHD6); (AtRHD6)	ROOT HAIR DEFECTIVE6;(source:Araport11)
0.365832	0.839793	AT1G62660	BFRUCT3	VACUOLAR INVERTASE 1 (VI1)	Glycosyl hydrolases family 32 protein;(source:Araport11)
0.366486	0.725738	AT2G17550		TON1 RECRUITING MOTIF 26 (TRM26)	RB1-inducible coiled-coil protein;(source:Araport11)
0.366766	0.707418	AT3G27170		(ATCLC-B);CHLORIDE CHANNEL B (CLC-B)	member of Anion channel protein family The mRNA is cell-to-cell mobile.
0.366948	0.665398	AT5G17860		(CCX1);CALCIUM EXCHANGER 7 (CAX7)	Cation/Ca2+ exchanger family member. Double mutants with CCX4 show delayed greening and defects in ROS response.
0.36695	0.572296	AT1G70880			Polyketide cyclase/dehydrase and lipid transport superfamily protein;(source:Araport11)
0.367386	0.517838	AT3G28550	EXT16	EXTENSIN 16 (EXT16)	Proline-rich extensin-like family protein;(source:Araport11)
0.368257	0.659203	AT2G05070	LHCB2.2	LIGHT-HARVESTING CHLOROPHYLL B-BINDING 2 (LHCB2);PHOTOSYSTEM II LIGHT HARVESTING COMPLEX GENE 2.2 (LHCB2.2)	Encodes Lhcb2.2. Belongs to the Lhc super-gene family encodes the light-harvesting chlorophyll a/b-binding (LHC) proteins that constitute the antenna system of the photosynthetic apparatus.
0.368421	1	AT3G15740			RING/U-box superfamily protein;(source:Araport11)
0.368421	1.23684	AT3G43930			BRCT domain-containing DNA repair protein;(source:Araport11)
0.369351	0.237217	AT1G66100			Predicted to encode a PR (pathogenesis-related) protein. Belongs to the plant thionin (PR-13) family with the following members: At1g66100, At5g36910, At1g72260, At2g15010, At1g12663, At1g12660.
0.370694	0.966521	AT2G28200			C2H2-type zinc finger family protein;(source:Araport11)
0.371212	0.80303	AT3G20460			Major facilitator superfamily protein;(source:Araport11)
0.371245	0.46696	AT2G30210	LAC3	LACCASE 3 (LAC3)	putative laccase, a member of laccase family of genes (17 members in Arabidopsis).
0.372093	0.263566	AT5G52300	LTI65,RD29B	LOW-TEMPERATURE-INDUCED 65 (LTI65);RESPONSIVE TO DESICCATION 29B (RD29B)	Encodes a protein that is induced in expression in response to water deprivation such as cold, high-salt, and desiccation. The response appears to be via abscisic acid. The promoter region contains two ABA-responsive elements (ABREs) that are required for the dehydration-responsive expression of rd29B as cis-acting elements. Protein is a member of a gene family with other members found plants, an…
0.372414	0.310345	AT5G52940		DUF295 ORGANELLAR B 5 (ATDOB5)	DUF295 domain protein.
0.372679	0.736737	AT3G26280		CYTOCHROME P450, FAMILY 71, SUBFAMILY B, POLYPEPTIDE 4 (CYP71B4)	cytochrome P450 monooxygenase
0.375527	1.03376	AT4G39795			hypothetical protein (DUF581);(source:Araport11)
0.375904	0.841308	AT5G46890			Bifunctional inhibitor/lipid-transfer protein/seed storage 2S albumin superfamily protein;(source:Araport11)
0.376018	0.617465	AT5G49740	FRO7	FERRIC REDUCTION OXIDASE 7 (FRO7);FERRIC REDUCTION OXIDASE 7 (ATFRO7)	Encodes a chloroplast ferric chelate reductase. Shows differential splicing and has three different mRNA products. Expressed in the shoot, flower and cotyledon.
0.376106	0.460177	AT2G34960		CATIONIC AMINO ACID TRANSPORTER 5 (CAT5)	Encodes a member of the cationic amino acid transporter (CAT) subfamily of amino acid polyamine choline transporters. Mediates efficient uptake of Lys, Arg and Glu in a yeast system. Localized to the plasma membrane.
0.376812	1.03865	AT3G02850		STELAR K+ OUTWARD RECTIFIER (SKOR)	Encodes SKOR, a member of Shaker family potassium ion (K+) channel. This family includes five groups based on phylogenetic analysis (FEBS Letters (2007) 581: 2357): I (inward rectifying channel): AKT1 (AT2G26650), AKT5 (AT4G32500) and SPIK (also known as AKT6, AT2G25600); II (inward rectifying channel): KAT1 (AT5G46240) and KAT2 (AT4G18290); III (weakly inward rectifying channel): AKT2 (AT4G22200…
0.377301	0.374233	AT2G45610			alpha/beta-Hydrolases superfamily protein;(source:Araport11)
0.377391	0.931304	AT5G18030		SMALL AUXIN UP RNA 21 (SAUR21)	SAUR-like auxin-responsive protein family;(source:Araport11)
0.377449	0.707948	AT2G41940	ZFP8	ZINC FINGER PROTEIN 8 (ZFP8);ZINC FINGER PROTEIN8 (ZFP8)	Encodes a zinc finger protein containing only a single zinc finger.
0.378487	0.730796	AT4G15490	UGT84A3	(UGT84A3)	Encodes a protein that might have sinapic acid:UDP-glucose glucosyltransferase activity.
0.379404	0.788618	AT3G32040	GGPS12	GERANYL(GERANYL)DIPHOSPHATE SYNTHASE 1 (ATGGPS10)	Chloroplast localized GFDP synthase.
0.38013	0.613391	AT2G34830		WRKY DNA-BINDING PROTEIN 35 (WRKY35);WRKY DNA-BINDING PROTEIN 35 (AtWRKY35);MATERNAL EFFECT EMBRYO ARREST 24 (MEE24)	member of WRKY Transcription Factor; Group II-e
0.38075	0.418228	AT2G18150	PER15		Peroxidase superfamily protein;(source:Araport11)
0.381183	0.691935	AT3G59930			Encodes a defensin-like (DEFL) family protein.
0.381538	0.833846	AT1G13830			Carbohydrate-binding X8 domain superfamily protein;(source:Araport11)
0.38172	0.408602	AT3G46810			Cysteine/Histidine-rich C1 domain family protein;(source:Araport11)
0.381724	0.787317	AT4G32280		INDOLE-3-ACETIC ACID INDUCIBLE 29 (IAA29)	indole-3-acetic acid inducible 29;(source:Araport11)
0.381791	0.491434	AT4G12320		CYTOCHROME P450, FAMILY 706, SUBFAMILY A, POLYPEPTIDE 6 (CYP706A6)	member of CYP706A
0.381885	0.713586	AT4G28890		ARABIDOPSIS TOXICOS EN LEVADURA 42 (ATL42)	RING/U-box superfamily protein;(source:Araport11)
0.381885	0.69186	AT2G39430			Disease resistance-responsive (dirigent-like protein) family protein;(source:Araport11)
0.382071	0.745825	AT2G37170	PIP2-2	PLASMA MEMBRANE INTRINSIC PROTEIN 2;2 (PIP2;2);PLASMA MEMBRANE INTRINSIC PROTEIN 2 (PIP2B)	a member of the plasma membrane intrinsic protein subfamily PIP2. localizes to the plasma membrane and exhibits water transport activity in Xenopus oocyte. expressed specifically in the vascular bundles and protein level increases slightly during leaf dev
0.382233	0.499789	AT5G12050		BIG GRAIN 1 (BG1)	rho GTPase-activating protein;(source:Araport11)
0.382235	0.448711	AT1G02810	PME7		Plant invertase/pectin methylesterase inhibitor superfamily;(source:Araport11)
0.382353	0.873529	AT3G48920	MYB45	MYB DOMAIN PROTEIN 45 (AtMYB45);MYB DOMAIN PROTEIN 45 (MYB45)	Member of the R2R3 factor gene family.
0.382716	1.48148	AT2G20880		(ATERF53);ERF DOMAIN 53 (ERF53)	Encodes ERF53, a drought-induced transcription factor. Belongs to the AP2/ERF superfamily, and has a highly conserved AP2 domain. Regulates drought-responsive gene expressions by binding to the GCC box and/or dehydration-responsive element (DRE) in the promoter of downstream genes. Overexpression of AtERF53 driven by the CaMV35S promoter resulted in an unstable drought-tolerant phenotype in T2 tr…
0.382979	0.609929	AT4G00390			DNA-binding storekeeper protein-related transcriptional regulator;(source:Araport11)
0.383164	0.571843	AT2G25090	CIPK16	CBL-INTERACTING PROTEIN KINASE 16 (CIPK16); (ATCIPK16);SNF1-RELATED PROTEIN KINASE 3.18 (SnRK3.18)	Encodes a member of the SNF1-related kinase (SnRK) gene family (SnRK3.18), which has also been reported as a member of the CBL-interacting protein kinases (CIPK16) and is involved in salinity tolerance.
0.383266	0.373819	AT3G16440		MYROSINASE-BINDING PROTEIN-LIKE PROTEIN-300B (ATMLP-300B);MYROSINASE-BINDING PROTEIN-LIKE PROTEIN-300B (MLP-300B);MATERNAL EFFECT EMBRYO ARREST 36 (MEE36)	myrosinase-binding protein-like protein (AtMLP-300B) mRNA,
0.383289	0.976127	AT3G18200		USUALLY MULTIPLE ACIDS MOVE IN AND OUT TRANSPORTERS 4 (UMAMIT4)	nodulin MtN21-like transporter family protein
0.38363	0.569621	AT1G07280			Tetratricopeptide repeat (TPR)-like superfamily protein;(source:Araport11)
0.383721	0.594574	AT1G61300			LRR and NB-ARC domains-containing disease resistance protein;(source:Araport11)
0.383929	0.741071	AT3G22540			hypothetical protein (DUF1677);(source:Araport11)
0.384106	0.799117	AT2G42850		CYTOCHROME P450, FAMILY 718 (CYP718)	cytochrome P450, family 718;(source:Araport11)
0.384303	0.631935	AT5G38865			hypothetical protein;(source:Araport11)
0.384328	0.873134	AT4G12450			zinc finger (C2H2 type) family protein;(source:Araport11)
0.384492	0.61231	AT1G30900		VACUOLAR SORTING RECEPTOR 6 (VSR6);BINDING PROTEIN OF 80 KDA 3;3 (BP80-3;3);VACUOLAR SORTING RECEPTOR 3;3 (VSR3;3)	VACUOLAR SORTING RECEPTOR 6;(source:Araport11)
0.385056	0.663212	AT3G15570			Phototropic-responsive NPH3 family protein;(source:Araport11)
0.386364	0.909091	AT5G66660			pectinesterase, putative (DUF677);(source:Araport11)
0.386928	0.576187	AT3G53480		POLAR AUXIN TRANSPORT INHIBITOR SENSITIVE 1 (PIS1);ATP-BINDING CASSETTE G37 (ABCG37);PLEIOTROPIC DRUG RESISTANCE 9 (ATPDR9);PLEIOTROPIC DRUG RESISTANCE 9 (PDR9)	Negative regulator of auxin polar transport inhibitors. ABCG37 regulates auxin distribution and homeostasis in roots by excluding IBA from the root apex, but does not act directly in basipetal transport. ABCG37 and ABCG36 act redundantly at outermost root plasma membranes and, transport IBA out of the cells. Also involved in root transmembrane secretion of fluorescent phenolics involved in Fe upt…
0.387283	1.05202	AT2G21185			transmembrane protein;(source:Araport11)
0.387435	0.78534	AT3G54870	MRH2	MORPHOGENESIS OF ROOT HAIR 2 (MRH2);ARABIDOPSIS THALIANA KINESIN UNGROUPED CLADE, GENE A (AtKINUc);CA-ROP2 ENHANCER 1 (CAE1);ARMADILLO REPEAT-CONTAINING KINESIN 1 (ARK1)	Armadillo-repeat containing kinesin-related protein. Plays a role during transition to root-hair tip growth.Mutants have short, branched root hairs and an excess of endoplasmic microtubles. Phenotype suggests ARK1 plays a role in modulating microtubule depolymerization during root hair tip growth.An HKT2.4 (CS76404) - ARK1 variant causes root hair branching.
0.38766	0.754366	AT5G67430			Acyl-CoA N-acyltransferases (NAT) superfamily protein;(source:Araport11)
0.388482	0.59267	AT1G56550	RGXT3	RHAMNOGALACTURONAN SPECI&#64257;C XYLOSYLTRANSFERASE 3 (RGXT3)	Encodes a rhamnogalacturonan II specific xylosyltransferase.
0.38874	0.265416	AT1G54040	ESP	(TASTY);EPITHIOSPECIFIER PROTEIN (ESP)	Epithiospecifier protein, interacts with WRKY53. Involved in pathogen resistance and leaf senescence.
0.388753	0.312958	AT4G21970			senescence regulator (Protein of unknown function, DUF584);(source:Araport11)
0.389402	0.809917	AT1G72200		ARABIDOPSIS TOXICOS EN LEVADURA 11 (ATL11)	RING/U-box superfamily protein;(source:Araport11)
0.389632	0.272575	AT5G59130			Subtilase family protein;(source:Araport11)
0.390154	0.74181	AT5G52900		MEMBRANE-ASSOCIATED KINASE REGULATOR 6 (MAKR6)	Encodes a member of the MAKR (MEMBRANE-ASSOCIATED KINASE REGULATOR) gene family. MAKRs have putative kinase interacting motifs and membrane localization signals. Known members include: AT5G26230 (MAKR1), AT1G64080 (MAKR2), AT2G37380 (MAKR3), AT2G39370 (MAKR4), AT5G52870 (MAKR5) and AT5G52900 (MAKR6).
0.39057	0.429204	AT1G06080		(ATADS1);DELTA 9 DESATURASE 1 (ADS1)	Encodes a protein homologous to delta 9 acyl-lipid desaturases of cyanobacteria and acyl-CoA desaturases of yeast and mammals. expression down-regulated by cold temperature. It is involved in the desaturation of VLCFAs to make monounsaturated VLCFAs.
0.391072	0.420356	AT5G09440		EXORDIUM LIKE 4 (EXL4)	EXORDIUM like 4;(source:Araport11)
0.391304	1	AT4G16162			Leucine-rich repeat (LRR) family protein;(source:Araport11)
0.391304	0.76087	AT5G26300			TRAF-like family protein;(source:Araport11)
0.391396	0.892807	AT5G18050		SMALL AUXIN UP RNA 22 (SAUR22)	SAUR-like auxin-responsive protein family;(source:Araport11)
0.392197	0.772074	AT5G09978		ELICITOR PEPTIDE 7 PRECURSOR (PEP7)	elicitor peptide 7 precursor;(source:Araport11)
0.392564	0.234008	AT1G80130			Tetratricopeptide repeat (TPR)-like superfamily protein;(source:Araport11)
0.393043	0.604348	AT2G40370	LAC5	LACCASE 5 (LAC5)	putative laccase, a member of laccase family of genes (17 members in Arabidopsis). Together with DP1/DIR12 involved in neolignan biosynthesis via sinapoylcholine/feruloylcholine.
0.393443	0.63466	AT2G06002			other_RNA;(source:Araport11)
0.393617	0.691489	AT3G47400	PME33		Plant invertase/pectin methylesterase inhibitor superfamily;(source:Araport11)
0.393814	0.680928	AT3G18170			Glycosyltransferase family 61 protein;(source:Araport11)
0.394366	0.629355	AT4G15230		(ATPDR2);ATP-BINDING CASSETTE G30 (ABCG30);PLEIOTROPIC DRUG RESISTANCE 2 (PDR2)	pleiotropic drug resistance 2;(source:Araport11)
0.394372	0.469237	AT4G37980		ELICITOR-ACTIVATED GENE 3-1 (ELI3-1);ELICITOR-ACTIVATED GENE 3 (ELI3);CINNAMALDEHYDE AND HEXENAL REDUCTASE (CHR);CINNAMYL-ALCOHOL DEHYDROGENASE 7 (CAD7); (ATCAD7)	NADPH-dependent cinnamaldehyde and hexenal reductase involved in the production of green leaf volitile compounds.
0.394737	1.65789	AT5G51210	OLEO3	OLEOSIN3 (OLEO3)	Encodes oleosin3, a protein found in oil bodies, involved in seed lipid accumulation.
0.394977	0.865297	AT1G68600			aluminum activated malate transporter family protein;(source:Araport11)
0.39521	1.22754	AT1G14960		BRASSIKIN1 (BKN1)	Polyketide cyclase/dehydrase and lipid transport superfamily protein;(source:Araport11)
0.39528	0.60472	AT1G74810		REQUIRES HIGH BORON 5 (BOR5)	HCO3- transporter family;(source:Araport11)
0.39548	0.79661	AT2G30230			6,7-dimethyl-8-ribityllumazine synthase;(source:Araport11)
0.395582	0.37751	AT5G49770			Leucine rich receptor kinase.
0.39593	0.530065	AT3G11110		ARABIDOPSIS TOXICOS EN LEVADURA 66 (ATL66)	RING/U-box superfamily protein;(source:Araport11)
0.39604	0.693069	AT5G46060			spastin, putative (Protein of unknown function, DUF599);(source:Araport11)
0.39615	0.182877	AT1G52000			Mannose-binding lectin superfamily protein;(source:Araport11)
0.396166	0.616613	AT1G72870			Disease resistance protein (TIR-NBS class);(source:Araport11)
0.396226	0.490566	AT3G14517			transposable_element_gene;(source:Araport11);non-LTR retrotransposon family (LINE), has a 9.0e-38 P-value blast match to GB:NP_038605 L1 repeat, Tf subfamily, member 30 (LINE-element) (Mus musculus);(source:TAIR10)
0.39679	0.612064	AT3G62090		PHYTOCHROME-INTERACTING FACTOR 6 (PIF6);PHYTOCHROME INTERACTING FACTOR 3-LIKE 2 (PIL2)	encodes a novel Myc-related bHLH transcription factor, which physically associated with APRR1/TOC1 and is a member of PIF3 transcription factor family.
0.396825	0.544012	AT5G24120		SIGMA FACTOR 5 (ATSIG5)	Encodes a specialized sigma factor that functions in regulation of plastid genes and is responsible for the light-dependent transcription at the psbD LRP. Activation of SIG5 is dependent upon blue light and mediated by cryptochromes.
0.397527	0.564625	AT5G64260		EXORDIUM LIKE 2 (EXL2)	EXORDIUM like 2;(source:Araport11)
0.397727	0.681818	AT3G17130			Plant invertase/pectin methylesterase inhibitor superfamily protein;(source:Araport11)
0.397924	0.515571	AT1G53870			LURP-one-like protein (DUF567);(source:Araport11)
0.398461	0.386619	AT2G21910		CYTOCHROME P450, FAMILY 96, SUBFAMILY A, POLYPEPTIDE 5 (CYP96A5)	member of CYP96A
0.39881	0.613095	AT4G02180			DC1 domain-containing protein;(source:Araport11)
0.399549	0.872335	AT3G26220		CYTOCHROME P450, FAMILY 71, SUBFAMILY B, POLYPEPTIDE 3 (CYP71B3)	cytochrome P450 monooxygenase
0.4	1.7	AT2G19582			Natural antisense transcript overlaps with AT2G19580;(source:Araport11)
0.4	0.8	AT2G07773			cytochrome B/B6 protein;(source:Araport11)
0.4	1.51429	AT1G48698			Potential natural antisense gene, locus overlaps with AT1G48700

## Sheet: S4. ZFP3-repressed, long E
Table S4. Genes with decreased expression (at least 2.5x) in ZFP3 overexpressing plants continuously treated with estradiol (Long treatment).
Fold change/Short	Fold change/Long	AGI	Protein	Gene Symbols	Gene Model Description
1.61333	0	AT4G37095			This gene encodes a small protein and has either evidence of transcription or purifying selection.
2.05	0	AT3G60470			transmembrane protein, putative (DUF247);(source:Araport11)
0	0	AT2G03740	LEA11	LATE EMBRYOGENESIS ABUNDANT 11 (LEA11)	Late embryogenesis abundant protein. Associates with and stabilizes membranes as part of cryoprotective response.
0.964286	0	AT5G36907			transmembrane protein;(source:Araport11)
0.868421	0	AT5G25470			AP2/B3-like transcriptional factor family protein;(source:Araport11)
0.576923	0	AT2G29470	GSTU3	GLUTATHIONE S-TRANSFERASE TAU 3 (ATGSTU3);GLUTATHIONE S-TRANSFERASE TAU 3 (GSTU3);GLUTATHIONE S-TRANSFERASE 21 (GST21)	Encodes glutathione transferase belonging to the tau class of GSTs. Naming convention according to Wagner et al. (2002).
0.361111	0	AT1G03390			HXXXD-type acyl-transferase family protein;(source:Araport11)
0.672414	0	AT1G50050			CAP (Cysteine-rich secretory proteins, Antigen 5, and Pathogenesis-related 1 protein) superfamily protein;(source:Araport11)
1.09524	0	AT2G41451			glycosyltransferase-like protein;(source:Araport11)
0	0	AT1G04707	unknown		Natural antisense transcript overlaps with AT1G09610;(source:Araport11)
0.655172	0	AT3G56891		HEAVY METAL ASSOCIATED PROTEIN 32 (ATHMP32)	Heavy metal transport/detoxification superfamily protein;(source:Araport11)
6.83333	0	AT2G00370			novel transcribed region;(source:Araport11)
0.970149	0.0298507	AT2G41850		POLYGALACTURONASE ABSCISSION ZONE A. THALIANA (PGAZAT);ARABIDOPSIS DEHISCENCE ZONE POLYGALACTURONASE 2 (ADPG2)	ADPG2.
0	0.0416667	AT1G11920	Pectin lyase-like		Pectin lyase-like superfamily protein;(source:Araport11)
0.222222	0.0444444	AT2G38220		ABERRANT POLLEN DEVELOPMENT 3 (APD3)	RING/U-box superfamily protein;(source:Araport11)
0.974359	0.0512821	AT5G22555			transmembrane protein;(source:Araport11)
0.162162	0.0540541	AT1G71520			encodes a member of the DREB subfamily A-5 of ERF/AP2 transcription factor family. The protein contains one AP2 domain. There are 16 members in this subfamily including RAP2.1, RAP2.9 and RAP2.10.
0.100775	0.0542636	AT2G15020	hypothetical		hypothetical protein;(source:Araport11)
0.416667	0.0555556	AT1G56710		POLYGALACTURONASE LIKE 1 (PGL1)	Pectin lyase-like superfamily protein;(source:Araport11)
0.490909	0.0727273	AT3G55550		L-TYPE LECTIN RECEPTOR KINASE S.4 (LECRK-S.4)	Concanavalin A-like lectin protein kinase family protein;(source:Araport11)
1.01923	0.0769231	AT1G19510	RL5	RAD-LIKE 5 (ATRL5);RADIALIS-LIKE SANT/MYB 4 (RSM4);RAD-LIKE 5 (RL5)	RAD-like 5;(source:Araport11)
0.5	0.0769231	AT4G08109			transposable_element_gene;(source:Araport11);gypsy-like retrotransposon family (Athila), has a 5.6e-161 P-value blast match to GB:CAA57397 Athila ORF 1 (Arabidopsis thaliana);(source:TAIR10)
0.27451	0.0784314	AT3G27250	AITR1	DIG-LIKE 4 (DIL4); (AITR1)	ABA&#8208;induced transcription repressor that acts as feedback regulator in ABA signalling.
0.315789	0.0789474	AT3G13540	MYB5	MYB DOMAIN PROTEIN 5 (ATMYB5);MYB DOMAIN PROTEIN 5 (MYB5);ABC TRANSPORTER OF THE MITOCHONDRION 2 (ATM2)	Encodes a member of the MYB family of transcriptional regulators. MYB5 act as a negative regulator of trichome branching and play a role in the correct formation of the seed coat and possibly the formation the underlying endosperm layers. Loss of function mutations have defects in seed coat mucilage and columella cells as well as trichome defects (smaller and reduced number of branches).
0.0557621	0.0817844	AT4G13420	HAK5	ARABIDOPSIS THALIANA HIGH AFFINITY K+ TRANSPORTER 5 (ATHAK5);HIGH AFFINITY K+ TRANSPORTER 5 (HAK5)	Encodes a protein of the KUP/HAK/KT potassium channel class that is upregulated in the roots by K levels.
0.0981873	0.0830816	AT5G35935	copia-like		transposable_element_gene;(source:Araport11);copia-like retrotransposon family, has a 2.0e-232 P-value blast match to GB:CAA72989 open reading frame 1 (Ty1_Copia-element) (Brassica oleracea);(source:TAIR10)
0.531915	0.0851064	AT5G24355			hypothetical protein;(source:Araport11)
0.548387	0.0967742	AT2G24010		SERINE CARBOXYPEPTIDASE-LIKE 23 (scpl23)	serine carboxypeptidase-like 23;(source:Araport11)
0.229167	0.104167	AT1G17030			hypothetical protein;(source:Araport11)
1.84211	0.105263	AT3G61810			Glycosyl hydrolase family 17 protein;(source:Araport11)
0.195946	0.121622	AT2G11810	MGDC	MONOGALACTOSYLDIACYLGLYCEROL SYNTHASE TYPE C (MGDC); (ATMGD3);MONOGALACTOSYL DIACYLGLYCEROL SYNTHASE 3 (MGD3)	MGD3 is the major enzyme for galactolipid metabolism during phosphate starvation. Does not contribute to galactolipid synthesis under P1-sufficient conditions.
0.353247	0.127273	AT3G21520		ARABIDOPSIS THALIANA DUF679 DOMAIN MEMBRANE PROTEIN 1 (AtDMP1);DUF679 DOMAIN MEMBRANE PROTEIN 1 (DMP1)	Encodes a protein is directly or indirectly involved in membrane fission during breakdown of the ER and the tonoplast during leaf senescence and in membrane fusion during vacuole biogenesis in roots. The mRNA is cell-to-cell mobile.
0	0.136364	AT2G32620	CSLB02	CELLULOSE SYNTHASE-LIKE B (ATCSLB02);CELLULOSE SYNTHASE-LIKE B (CSLB02);CELLULOSE SYNTHASE LIKE B2 (ATCSLB2);CELLULOSE SYNTHASE LIKE B2 (CSLB02)	encodes a gene similar to cellulose synthase
0.869888	0.136617	AT4G10130			DNAJ heat shock N-terminal domain-containing protein;(source:Araport11)
6.27627	0.138136	AT4G12500			Bifunctional inhibitor/lipid-transfer protein/seed storage 2S albumin superfamily protein;(source:Araport11)
0.362637	0.142857	AT4G15300		CYTOCHROME P450, FAMILY 702, SUBFAMILY A, POLYPEPTIDE 2 (CYP702A2)	cytochrome P450, family 702, subfamily A, polypeptide 2;(source:Araport11)
0.211382	0.146341	AT5G47000	PER65		Peroxidase superfamily protein;(source:Araport11)
0	0.146341	AT4G26380	C1 domain family		Cysteine/Histidine-rich C1 domain family protein;(source:Araport11)
1.3	0.15	AT5G25920			hypothetical protein;(source:Araport11)
0.424242	0.151515	AT5G53135			transposable_element_gene;(source:Araport11);copia-like retrotransposon family, has a 6.9e-199 P-value blast match to GB:CAA72989 open reading frame 1 (Ty1_Copia-element) (Brassica oleracea);(source:TAIR10)
0.047619	0.154762	AT1G18975	hypothetical		hypothetical protein;(source:Araport11)
1.15596	0.155963	AT5G24070			Peroxidase superfamily protein;(source:Araport11)
0.538697	0.15734	AT5G42530			hypothetical protein;(source:Araport11)
0.204506	0.168977	AT2G30360		SOS3-INTERACTING PROTEIN 4 (SIP4);PROTEIN KINASE SOS2-LIKE 5 (PKS5);CBL-INTERACTING PROTEIN KINASE 11 (CIPK11);SNF1-RELATED PROTEIN KINASE 3.22 (SNRK3.22)	Encodes a SOS2-like protein kinase that is a member of the CBL-interacting protein kinase family.Loss of function mutants show a decrease in sensitivity to high pH.Phosphorylates AHA2, a plasma membrane H+ ATPase.This phosphorylation appears to regulate the activity of the proton transporter.
0.590476	0.171429	AT3G00250			novel transcribed region;(source:Araport11)
0.287356	0.174713	AT4G14630		GERMIN-LIKE PROTEIN 9 (GLP9)	germin-like protein with N-terminal signal sequence that may target it to the vacuole, plasma membrane and/or outside the cell. The mRNA is cell-to-cell mobile.
0.36075	0.176046	AT2G35980		YELLOW-LEAF-SPECIFIC GENE 9 (YLS9);ARABIDOPSIS NDR1/HIN1-LIKE 10 (ATNHL10);NDR1/HIN1-LIKE (NHL10)	Encodes a protein whose sequence is similar to tobacco hairpin-induced gene (HIN1) and Arabidopsis non-race specific disease resistance gene (NDR1). Expression of this gene is induced by cucumber mosaic virus, spermine and during senescence. The gene product is localized to the chloroplast. The mRNA is cell-to-cell mobile.
0.264368	0.181034	AT2G36750		UDP-GLUCOSYL TRANSFERASE 73C1 (UGT73C1)	UDP-glucosyl transferase 73C1;(source:Araport11)
0.182616	0.181738	AT4G14400		(DEG16);ACCELERATED CELL DEATH 6 (ACD6)	encodes a novel protein with putative ankyrin and transmembrane regions. It is a member of one of the largest uncharacterized gene families in higher plants. The gene is involved in resistance to Pseudomonas syringae.
0.636039	0.18198	AT5G20790			transmembrane protein;(source:Araport11)
0.39615	0.182877	AT1G52000			Mannose-binding lectin superfamily protein;(source:Araport11)
0.242347	0.193027	AT1G51470		THIOGLUCOSIDE GLUCOHYDROLASE 5 (TGG5);BETA GLUCOSIDASE 35 (BGLU35)	Encodes a myrosinase.
0.222222	0.194444	AT2G24720	GLR2.2	GLUTAMATE RECEPTOR 2.2 (ATGLR2.2);GLUTAMATE RECEPTOR 2.2 (GLR2.2)	member of Putative ligand-gated ion channel subunit family
0.268041	0.195876	AT3G20160	GGPS8	GERANYL(GERANYL)DIPHOSPHATE SYNTHASE 8 (ATGGPS8);POLYPRENYL PYROPHOSPHATE SYNTHASE 2 (PPPS2)	Terpenoid synthases superfamily protein;(source:Araport11)
0.141509	0.199461	AT5G44440	BBE28	(ATBBE28)	FAD-binding Berberine family protein;(source:Araport11)
0.5	0.2	AT5G18661			This gene encodes a small protein and has either evidence of transcription or purifying selection.
0.542373	0.20339	ArthCp076
0.641026	0.205128	AT4G16160	OEP16-2	(ATOEP16-S); (ATOEP16-2)	Homologous to pea OEP16 and barley pPORA (OEP16), a member of Arabidopsis OEP16 family. Two OEP16 genes are closely related to each other and are conserved in all land plants, OEP16-2, also named OEP16-S, and OEP16-1 (renamed OEP16-L) are result of the gene duplication event that occurred prior to divergence of bryophytes and seed plants. Predominantly expressed in seed and is not inducible by co…
7.1544	0.207479	AT5G61160	AACT1	P-COUMAROYL-COA:AGMATINE N4-P-COUMAROYL TRANSFERASE (ACT);ANTHOCYANIN 5-AROMATIC ACYLTRANSFERASE 1 (AACT1)	anthocyanin 5-aromatic acyltransferase 1;(source:Araport11)
0.248227	0.208038	AT2G47780		SMALL RUBBER PARTICLE PROTEIN2 (SRP2);LD-ASSOCIATED PROTEIN 2 (LDAP2)	Encodes a small rubber particle protein homolog. Plays dual roles as positive factors for tissue growth and development and in drought stress responses.
0.508716	0.20974	AT4G13510		AMMONIUM TRANSPORTER 1;1 (AMT1;1); (ATAMT1;1);ARABIDOPSIS THALIANA AMMONIUM TRANSPORT 1 (ATAMT1)	Encodes a plasma membrane localized ammonium transporter. Contains a cytosolic trans-activation domain essential for ammonium uptake. The mRNA is cell-to-cell mobile.
0.446154	0.215385	AT2G02990	RNS1	RIBONUCLEASE 1 (ATRNS1);RIBONUCLEASE 1 (RNS1)	Encodes a member of the ribonuclease T2 family that responds to inorganic phosphate starvation, and inhibits production of anthocyanin. Also involved in wound-induced signaling independent of jasmonic acid. Its expression is responsive to both phosphate (Pi) and phosphite (Phi) in roots.
0.409091	0.215909	AT5G05340	PRX52	PEROXIDASE 52 (PRX52)	Encodes a protein with sequence similarity to peroxidases that is involved in lignin biosynthesis. Loss of function mutations show abnormal development of xylem fibers and reduced levels of lignin biosynthetic enxymes.
0.243243	0.216216	AT5G40900			Nucleotide-diphospho-sugar transferase family protein;(source:Araport11)
2.15071	0.21752	AT4G26200		(ATACS7);1-AMINO-CYCLOPROPANE-1-CARBOXYLATE SYNTHASE 7 (ACCS7);1-AMINO-CYCLOPROPANE-1-CARBOXYLATE SYNTHASE 7 (ACS7)	Member of a family of proteins in Arabidopsis that encode 1-Amino-cyclopropane-1-carboxylate synthase, an enzyme involved in ethylene biosynthesis. Not expressed in response to IAA.
0.637363	0.21978	AT4G04710		CALCIUM-DEPENDENT PROTEIN KINASE 22 (CPK22)	member of Calcium Dependent Protein Kinase
0.5	0.222222	AT4G15350		CYTOCHROME P450, FAMILY 705, SUBFAMILY A, POLYPEPTIDE 2 (CYP705A2)	member of CYP705A
0.639898	0.226259	AT5G48430			Eukaryotic aspartyl protease family protein;(source:Araport11)
0.439535	0.226744	AT1G18710	MYB47	MYB DOMAIN PROTEIN 47 (AtMYB47);MYB DOMAIN PROTEIN 47 (MYB47)	Member of the R2R3 factor gene family. Promotes seed longevity (viability of seed over time.) Expressed in the chalazal seed coat. Overexpresion enhances resistance of seed to deterioration (PMID:32519347).
0.881818	0.227273	AT1G29090			Cysteine proteinases superfamily protein;(source:Araport11)
0.819672	0.229508	AT2G17050			disease resistance protein (TIR-NBS-LRR class);(source:Araport11)
0.948718	0.230769	AT2G07774			hypothetical protein;(source:Araport11)
0.194074	0.232593	AT5G59260		L-TYPE LECTIN RECEPTOR KINASE II.1 (LECRK-II.1)	Concanavalin A-like lectin protein kinase family protein;(source:Araport11)
0.392564	0.234008	AT1G80130			Tetratricopeptide repeat (TPR)-like superfamily protein;(source:Araport11)
0.216216	0.234234	AT3G13840			GRAS family transcription factor;(source:Araport11)
0.71875	0.234375	AT1G71380		ARABIDOPSIS THALIANA GLYCOSYL HYDROLASE 9B3 (ATGH9B3);CELLULASE 3 (CEL3);CELLULASE 3 (ATCEL3)	cellulase 3;(source:Araport11)
0.369351	0.237217	AT1G66100			Predicted to encode a PR (pathogenesis-related) protein. Belongs to the plant thionin (PR-13) family with the following members: At1g66100, At5g36910, At1g72260, At2g15010, At1g12663, At1g12660.
0.149606	0.240157	AT5G42600	MRN1	MARNERAL SYNTHASE 1 (MRN1)	Encodes an oxidosqualene synthase that produces the monocyclic triterpene marneral. Crucial for growth and development.
0.291971	0.240876	AT1G73810			Core-2/I-branching beta-1,6-N-acetylglucosaminyltransferase family protein;(source:Araport11)
0.4	0.241667	AT1G33540	SCPL18	SERINE CARBOXYPEPTIDASE-LIKE 18 (scpl18)	serine carboxypeptidase-like 18;(source:Araport11)
0.347458	0.242373	AT2G37030		SMALL AUXIN UPREGULATED RNA 46 (SAUR46)	SAUR-like auxin-responsive protein family;(source:Araport11)
0.333333	0.242424	AT2G21780			hypothetical protein;(source:Araport11)
0.283489	0.246106	AT1G55990			glycine-rich protein;(source:Araport11)
1.1	0.25	AT1G08965			novel transcribed region;(source:Araport11)
0.329513	0.253582	AT4G37409			hypothetical protein;(source:Araport11)
0.507463	0.253731	AT5G34810			transposable_element_gene;(source:Araport11);pseudogene, hypothetical protein, predicted proteins - Arabidopsis thaliana;(source:TAIR10)
0.552933	0.253934	AT3G56400	WRKY70	ARABIDOPSIS THALIANA WRKY DNA-BINDING PROTEIN 70 (ATWRKY70);WRKY DNA-BINDING PROTEIN 70 (WRKY70)	Member of WRKY Transcription Factor; Group III. Function as activator of SA-dependent defense genes and a repressor of JA-regulated genes. WRKY70-controlled suppression of JA-signaling is partly executed by NPR1.
0.746032	0.253968	AT5G55570			transmembrane protein;(source:Araport11)
0.454545	0.254545	AT1G09905			novel transcribed region;(source:Araport11)
1.4	0.257143	AT5G40210		USUALLY MULTIPLE ACIDS MOVE IN AND OUT TRANSPORTERS 42 (UMAMIT42)	nodulin MtN21-like transporter family protein
0.412014	0.258601	AT1G10155		PHLOEM PROTEIN 2-A10 (AtPP2-A10);PHLOEM PROTEIN 2-A10 (PP2-A10)	phloem protein 2-A10;(source:Araport11)
0.652174	0.26087	AT5G53710			hypothetical protein;(source:Araport11)
0.436893	0.262136	AT4G10350		NAC DOMAIN CONTAINING PROTEIN 70 (ANAC070);NAC DOMAIN CONTAINING PROTEIN 70 (NAC070);BEARSKIN 2 (BRN2)	NAC domain protein. SMB, BRN1, and BRN2 act to regulate root cap maturation, in a partially redundant fashion.BRN1 and BRN2, control the cell wall maturation processes that are required to detach root cap layers from the root.
0.1625	0.2625	AT4G13890	EDA36	SERINE HYDROXYMETHYLTRANSFERASE 5 (SHM5);EMBRYO SAC DEVELOPMENT ARREST 36 (EDA37);EMBRYO SAC DEVELOPMENT ARREST 37 (EDA36)	Pyridoxal phosphate (PLP)-dependent transferases superfamily protein;(source:Araport11)
0.372093	0.263566	AT5G52300	LTI65,RD29B	LOW-TEMPERATURE-INDUCED 65 (LTI65);RESPONSIVE TO DESICCATION 29B (RD29B)	Encodes a protein that is induced in expression in response to water deprivation such as cold, high-salt, and desiccation. The response appears to be via abscisic acid. The promoter region contains two ABA-responsive elements (ABREs) that are required for the dehydration-responsive expression of rd29B as cis-acting elements. Protein is a member of a gene family with other members found plants, an…
0.196139	0.264093	AT5G57550	XTH25	XYLOGLUCAN ENDOTRANSGLUCOSYLASE/HYDROLASE 25 (XTH25);XYLOGLUCAN ENDOTRANSGLYCOSYLASE 3 (XTR3)	xyloglucan endotransglycosylase-related protein (XTR3)
0.518868	0.264151	AT4G11655		CASP-LIKE PROTEIN 4A4 (CASPL4A4)	Uncharacterized protein family (UPF0497);(source:Araport11)
1.25	0.264706	AT3G27900			hypothetical protein (DUF1184);(source:Araport11)
1.73469	0.265306	AT2G20800		NAD(P)H DEHYDROGENASE B4 (NDB4)	NAD(P)H dehydrogenase B4;(source:Araport11)
0.440758	0.265403	AT1G68940	PUB42	(PUB42)	Plant U-box type E3 ubiquitin ligase (PUB).
0.38874	0.265416	AT1G54040	ESP	(TASTY);EPITHIOSPECIFIER PROTEIN (ESP)	Epithiospecifier protein, interacts with WRKY53. Involved in pathogen resistance and leaf senescence.
0.776371	0.265823	AT2G47880	GRXC13	CEP DOWNSTREAM 2 (CEPD2); (ROXY9)	Encodes a member of the CC-type glutaredoxin (ROXY) family. CEPD2 is a non secreted polypeptide that is highly similar to CEPD1 which is another member of a novel family related to glutaredoxins. It is induced by nitrogen starvation. It acts downstream of the CEP1 peptide in systemic N-demand signalling .The RNA is expressed in the phloem of cotelydon and leaf vasculature but the peptide is graft…
0.333333	0.266667	AT4G28110	MYB41	MYB DOMAIN PROTEIN 41 (MYB41);MYB DOMAIN PROTEIN 41 (AtMYB41)	Member of the R2R3 factor gene family. Expression is induced in response to desiccation, ABA and salt treatment. Overexpression of Myb41 results in abnormal cuticle development and decreased cell expansion.
1.73333	0.266667	AT3G44830			Lecithin:cholesterol acyltransferase family protein;(source:Araport11)
0.829268	0.268293	AT5G60130			AP2/B3-like transcriptional factor family protein;(source:Araport11)
0.269841	0.269841	AT5G41030			TCP family transcription factor;(source:Araport11)
0.389632	0.272575	AT5G59130			Subtilase family protein;(source:Araport11)
1.43939	0.272727	AT3G59130			Cysteine/Histidine-rich C1 domain family protein;(source:Araport11)
0.468641	0.273955	AT1G52070			Mannose-binding lectin superfamily protein;(source:Araport11)
0.212766	0.276596	AT2G31420			B3 domain protein (DUF313);(source:Araport11)
0.510086	0.276657	AT3G53150		UDP-GLUCOSYL TRANSFERASE 73D1 (UGT73D1)	UDP-glucosyl transferase 73D1;(source:Araport11)
0.0193548	0.277419	AT1G54940	PGSIP4,GUX4	GLUCURONIC ACID SUBSTITUTION OF XYLAN 4 (GUX4);PLANT GLYCOGENIN-LIKE STARCH INITIATION PROTEIN 4 (PGSIP4)	Encodes a xylan glucuronosyltransferase.
0.417722	0.278481	AT4G13800	ENOR3L3	(ENOR3L3)	magnesium transporter NIPA (DUF803);(source:Araport11)
2.48598	0.280374	AT4G12735			Encodes a peroxisomal protein.
0.2705	0.280867	AT3G21320			EARLY FLOWERING protein;(source:Araport11)
0	0.282609	AT5G11180	GLR2.6	GLUTAMATE RECEPTOR 2.6 (GLR2.6);ARABIDOPSIS THALIANA GLUTAMATE RECEPTOR 2.6 (ATGLR2.6)	member of Putative ligand-gated ion channel subunit family
0.326843	0.283264	AT5G66400	RAB18	ARABIDOPSIS THALIANA DROUGHT-INDUCED 8 (ATDI8);RESPONSIVE TO ABA 18 (RAB18)	Belongs to the dehydrin protein family, which contains highly conserved stretches of 7-17 residues that are repetitively scattered in their sequences, the K-, S-, Y- and lysine rich segments. ABA- and drought-induced glycine-rice dehydrin protein. The ABA-induced expression of RAB18 was reduced following ACC application, indicating that ethylene inhibits the ABA signaling pathway. RAB18 is also e…
1.21667	0.283333	AT1G78360		GLUTATHIONE S-TRANSFERASE TAU 21 (GSTU21);GLUTATHIONE S-TRANSFERASE TAU 21 (ATGSTU21)	Encodes glutathione transferase belonging to the tau class of GSTs. Naming convention according to Wagner et al. (2002).
0.445933	0.285167	AT5G60530			Root tip expressed LEA protein involved in ribosome biogenesis.
0.666667	0.285714	AT5G03130			hypothetical protein;(source:Araport11)
1.09524	0.285714	AT2G08425			Natural antisense transcript overlaps with AT2G30960;(source:Araport11)
0.269544	0.286645	AT4G33610			glycine-rich protein;(source:Araport11)
0.453125	0.287946	AT5G59820	RHL41,ZAT12	RESPONSIVE TO HIGH LIGHT 41 (RHL41); (ATZAT12); (ZAT12)	Encodes a zinc finger protein involved in high light and cold acclimation. Overexpression of this putative transcription factor increases the expression level of 9 cold-responsive genes and represses the expression level of 15 cold-responsive genes, including CBF genes. Also, lines overexpressing this gene exhibits a small but reproducible increase in freeze tolerance. Because of the repression o…
0.363844	0.28833	AT3G19430			late embryogenesis abundant protein-related / LEA protein-like protein;(source:Araport11)
0.288889	0.288889	AT2G08950			None;(source:Araport11)
1	0.289474	AT5G45770		RECEPTOR LIKE PROTEIN 55 (RLP55);RECEPTOR LIKE PROTEIN 55 (AtRLP55)	receptor like protein 55;(source:Araport11)
0.300699	0.29021	AT1G13520			hypothetical protein (DUF1262);(source:Araport11)
0.418605	0.290698	AT1G03070		LIFEGUARD 4 (LFG4); (ATLFG4)	Bax inhibitor-1 family protein;(source:Araport11)
0.340136	0.293564	AT3G22800			Leucine-rich repeat (LRR) family protein;(source:Araport11)
0.548349	0.293632	AT4G04990			serine/arginine repetitive matrix-like protein (DUF761);(source:Araport11)
0.147059	0.294118	AT5G26320	TRAF-like protein		TRAF-like family protein;(source:Araport11)
0.382353	0.294118	AT2G34990		ARABIDOPSIS TOXICOS EN LEVADURA 38 (ATL38)	RING/U-box superfamily protein;(source:Araport11)
0.279966	0.294167	AT2G38940		ARABIDOPSIS THALIANA PHOSPHATE TRANSPORTER 2 (ATPT2);PHOSPHATE TRANSPORTER 1;4 (PHT1;4)	Encodes Pht1;4, a member of the Pht1 family of phosphate transporters which include: Pht1;1/At5g43350, Pht1;2/At5g43370, Pht1;3/At5g43360, Pht1;4/At2g38940, Pht1;5/At2g32830, Pht1;6/At5g43340, Pht1;7/At3g54700, Pht1;8/At1g20860, Pht1;9/At1g76430 (Plant Journal 2002, 31:341). Expression is upregulated in the shoot of cax1/cax3 mutant and is responsive to phosphate (Pi) and not phosphite (Phi) in r…
0.27907	0.294574	AT5G60520			Late embryogenesis abundant (LEA) protein-like protein;(source:Araport11)
0.227273	0.295455	AT5G21080			Uncharacterized protein;(source:Araport11)
1.07685	0.297468	AT2G19190		FLG22-INDUCED RECEPTOR-LIKE KINASE 1 (FRK1);SE- NESCENCE-INDUCED RECEPTOR-LIKE KINASE (SIRK)	Encodes a receptor-like protein kinase that is involved in early defense signaling. Expression of this gene is strongly induced during leaf senescence. It is a target of the transcription factor AtWRKY6.
0.526316	0.298246	AT1G77730			Pleckstrin homology (PH) domain superfamily protein;(source:Araport11)
0.298246	0.298246	AT1G77960			repressor ROX1-like protein;(source:Araport11)
0.324967	0.298547	AT2G39380		EXOCYST SUBUNIT EXO70 FAMILY PROTEIN H2 (ATEXO70H2);EXOCYST SUBUNIT EXO70 FAMILY PROTEIN H2 (EXO70H2)	A member of EXO70 gene family, putative exocyst subunits, conserved in land plants. Arabidopsis thaliana contains 23 putative EXO70 genes, which can be classified into eight clusters on the phylogenetic tree.
0.285942	0.299735	AT2G42530	COR15B	COLD REGULATED 15B (COR15B)	Encodes COR15B, a protein that protects chloroplast membranes during freezing.
2.97627	0.299918	AT4G12490	AZI3	(AZI3)	Encodes a member of the AZI family of lipid transfer proteins. Contains a PRR domain that appears to be required for localization to the chloroplast.
11.5	0.3	AT5G09125			None;(source:Araport11)
0.509434	0.301887	DA397_mgp29
0.346774	0.302419	AT1G51090	HMAD1	HEAVY METAL ASSOCIATED PROTEIN 9 (ATHMP09); (ATHMAD1)	Heavy metal associated domain containing protein involved in plant immunity.Mutants show an increase in root length under NO stress and reduction in root length under H2O2 stress conditions. Mutants show increases in defense responses to pathogens including hypersensitive lesions, increased resistance and induction of SAR genes.
1.21739	0.304348	AT1G35240		AUXIN RESPONSE FACTOR 20 (ARF20)	auxin response factor 20;(source:Araport11)
0.826087	0.304348	AT2G07719			Putative membrane lipoprotein;(source:Araport11)
0.623958	0.304987	AT1G35140	PHI-1,EXL1	PHOSPHATE-INDUCED 1 (PHI-1);HYPOXIA RESPONSE UNKNOWN PROTEIN 46 (HUP46);EXORDIUM LIKE 7 (EXL7);EXORDIUM LIKE 1 (EXL1)	EXL1 is involved in the C-starvation response. Phenotypic changes of an exl1 loss of function mutant became evident only under corresponding experimental conditions. For example, the mutant showed diminished biomass production in a short-day/low light growth regime, impaired survival during extended night, and impaired survival of anoxia stress.
0.34384	0.30659	AT5G06090		GLYCEROL-3-PHOSPHATE SN-2-ACYLTRANSFERASE 7 (ATGPAT7);GLYCEROL-3-PHOSPHATE SN-2-ACYLTRANSFERASE 7 (GPAT7)	putative sn-glycerol-3-phosphate 2-O-acyltransferase
0.219697	0.306818	AT2G23630		SKU5 SIMILAR 16 (sks16)	SKU5 similar 16;(source:Araport11)
0.622964	0.307003	AT5G54370			Late embryogenesis abundant (LEA) protein-like protein;(source:Araport11)
0.0769231	0.307692	AT5G45090	PP2-A7	PHLOEM PROTEIN 2-A7 (PP2-A7);PHLOEM PROTEIN 2-A7 (AtPP2-A7)	phloem protein 2-A7;(source:Araport11)
0.540541	0.308108	AT3G28510			P-loop containing nucleoside triphosphate hydrolases superfamily protein;(source:Araport11)
0.372414	0.310345	AT5G52940		DUF295 ORGANELLAR B 5 (ATDOB5)	DUF295 domain protein.
1.68966	0.310345	AT3G12220	SCPL16	SERINE CARBOXYPEPTIDASE-LIKE 16 (scpl16)	serine carboxypeptidase-like 16;(source:Araport11)
0.0582524	0.31068	AT4G25190	QWRF7	QWRF DOMAIN CONTAINING 7 (QWRF7)	QWRF motif protein (DUF566);(source:Araport11)
0.192651	0.311817	AT2G42540	COR15A	COLD-REGULATED 15A (COR15A); (ATCOR15A); (COR15)	A cold-regulated gene whose product is targeted to the chloroplast. Cor15am protects stromal proteins from aggregation under various stress conditions. Constitutive expression increases freezing tolerance in protoplasts in vitro and chloroplasts in vivo. NMR and x-ray diffraction studies suggest that COR15a alters the intrinsic curvature of the inner membrane of chloroplast envelope. Late Embryog…
0.6875	0.3125	AT3G23010		RECEPTOR LIKE PROTEIN 36 (AtRLP36);RECEPTOR LIKE PROTEIN 36 (RLP36)	receptor like protein 36;(source:Araport11)
2.25	0.3125	AT1G49640			alpha/beta-Hydrolases superfamily protein;(source:Araport11)
0.388753	0.312958	AT4G21970			senescence regulator (Protein of unknown function, DUF584);(source:Araport11)
0.0105003	0.313774	AT5G15180	PRX56	PEROXIDASE 56 (PRX56)	Peroxidase superfamily protein;(source:Araport11)
0.7	0.314286	AT3G62730			desiccation-like protein;(source:Araport11)
0.242105	0.315789	AT5G42580		CYTOCHROME P450, FAMILY 705, SUBFAMILY A, POLYPEPTIDE 12 (CYP705A12)	a member of the cytochrome P450 family
0.289253	0.316232	AT5G13580	ABCG6	JASMONIC ACID TRANSPORTER 3 (JAT3);ATP-BINDING CASSETTE G6 (ABCG6)	Belongs to a clade of five Arabidopsis thaliana ABCG half-transporters that are required for synthesis of an effective suberin barrier in roots and seed coats (ABCG2, ABCG6, and ABCG20) and for synthesis of an intact pollen wall (ABCG1 and ABCG16). Phloem-expressed and plasma membrane-localized jasmonate transporter which together with JAT4 and GLR3.3 involved in regulating long-distance transloc…
0.314456	0.317272	AT1G69490	NAP	ARABIDOPSIS NAC DOMAIN CONTAINING PROTEIN 29 (ANAC029);NAC-LIKE, ACTIVATED BY AP3/PI (NAP);NAC-LIKE, ACTIVATED BY AP3/PI (ATNAP)	Encodes a member of the NAC transcription factor gene family. It is expressed in floral primordia and upregulated by AP3 and PI. Its expression is associated with leaf senescence. The mRNA is cell-to-cell mobile.
0.522314	0.317332	AT4G20860	BBE22	(ATBBE22);CELLODEXTRIN OXIDASE (CELLOX);BERBERINE BRIDGE ENZYME 22 (BBE22)	involved in the generation of H2O2 from reduced compounds
0.522727	0.318182	AT4G23515			Toll-Interleukin-Resistance (TIR) domain family protein;(source:Araport11)
0.339009	0.318885	AT1G08430		ARABIDOPSIS THALIANA ALUMINUM-ACTIVATED MALATE TRANSPORTER 1 (ATALMT1);ALUMINUM-ACTIVATED MALATE TRANSPORTER 1 (ALMT1)	Encodes a Al-activated malate efflux transporter. It is essential for aluminum tolerance but does not represent the major Al tolerance QTL. Staurosporine and calyculin A both block all changes in AtALMT1 gene expression (as a result malate release is totally inhibited). AtALMT1 transcription was clearly induced by indole-3-acetic acid, abscisic acid, low pH, hydrogen peroxide and flg22. STOP1 and…
0.2	0.32	AT1G65570		ROOT CAP POLYGALACTURONASE (RCPG)	Encodes a glycosyl hydrolase 28 (GH28) family polygalacturonase (PG) protein. Involved in root cap development.
0.447514	0.320442	AT1G72850			Disease resistance protein (TIR-NBS class);(source:Araport11)
0.59011	0.320879	AT1G51820		STRESS INDUCED FACTOR 4 (SIF4)	Leucine-rich repeat protein kinase family protein;(source:Araport11)
2.1499	0.322756	AT2G43620			Chitinase family protein;(source:Araport11)
0.336209	0.32338	AT4G26530		FRUCTOSE-BISPHOSPHATE ALDOLASE 5 (FBA5); (ATFBA5); (DEG22)	Aldolase superfamily protein;(source:Araport11)
0.33957	0.323667	AT1G68620	CXE6		alpha/beta-Hydrolases superfamily protein;(source:Araport11)
0.62963	0.324074	AT3G47090			Leucine-rich repeat protein kinase family protein;(source:Araport11)
0.839286	0.324405	AT1G64360		ENESCENCE-ASSOCIATED AND QQS-RELATED (SAQR)	SAQR is a clade specific protein present in single copy in Arabidopsis.It's expression is increased during light induced oxidative stress ,drought stress and also during senescence. Promoter contains two AGL15 binding sites.
0.634921	0.325397	AT5G01320			Thiamine pyrophosphate dependent pyruvate decarboxylase family protein;(source:Araport11)
0.74221	0.325779	AT4G22610			Bifunctional inhibitor/lipid-transfer protein/seed storage 2S albumin superfamily protein;(source:Araport11)
1.09272	0.327815	AT2G29460	GSTU4	GLUTATHIONE S-TRANSFERASE TAU 4 (ATGSTU4);GLUTATHIONE S-TRANSFERASE TAU 4 (GSTU4);GLUTATHIONE S-TRANSFERASE 22 (GST22)	Encodes glutathione transferase belonging to the tau class of GSTs. Naming convention according to Wagner et al. (2002). Role in the degradation of H2O2 to water using glutathione as electron donor
0.1	0.328571	AT1G61950	CPK19	CALCIUM-DEPENDENT PROTEIN KINASE 19 (CPK19)	member of Calcium Dependent Protein Kinase
0.29	0.33	AT1G02390		GLYCEROL-3-PHOSPHATE SN-2-ACYLTRANSFERASE 2 (ATGPAT2);GLYCEROL-3-PHOSPHATE SN-2-ACYLTRANSFERASE 2 (GPAT2)	putative sn-glycerol-3-phosphate 2-O-acyltransferase
0	0.331081	AT5G23030	TET12	TETRASPANIN12 (TET12)	Member of TETRASPANIN family
1.39829	0.331769	AT3G12580		(HSC70-4);ARABIDOPSIS HEAT SHOCK PROTEIN 70 (ATHSP70);HEAT SHOCK PROTEIN 70 (HSP70)	heat shock protein 70;(source:Araport11)
0.727395	0.332524	AT3G15530			S-adenosyl-L-methionine-dependent methyltransferases superfamily protein;(source:Araport11)
1.91331	0.333226	AT1G26250	EXT18	EXTENSIN 18 (EXT18)	Proline-rich extensin-like family protein;(source:Araport11)
0.666667	0.333333	AT3G47030			F-box and associated interaction domains-containing protein;(source:Araport11)
0.209402	0.333333	AT5G20860	PME54		Plant invertase/pectin methylesterase inhibitor superfamily;(source:Araport11)
0.461538	0.333333	AT3G04330			Kunitz family trypsin and protease inhibitor protein;(source:Araport11)
0.351852	0.333333	AT5G50260		CYSTEINE ENDOPEPTIDASE 1 (CEP1)	Encodes a papain-like cysteine protease involved in tapetal programmed cell death and pollen development.CEP1 is expressed specifically in the tapetum from stages 5 to 11 of anther development. The CEP1 protein first appears as a proenzyme in precursor protease vesicles, and is then transported to the vacuole and transformed into the mature enzyme before rupture of the vacuole. CEP1 was also rele…
0.410302	0.333925	AT1G65730		YELLOW STRIPE LIKE 7 (YSL7)	Arabidopsis thaliana metal-nicotianamine transporter YSL4
0.605566	0.333938	AT1G07180		ARABIDOPSIS THALIANA INTERNAL NON-PHOSPHORYLATING NAD ( P ) H DEHYDROGENASE (ATNDI1);ALTERNATIVE NAD(P)H DEHYDROGENASE 1 (NDA1)	Internal NAD(P)H dehydrogenase in mitochondria. The predicted protein sequence has high homology with other designated NAD(P)H DHs from microorganisms; the capacity for matrix NAD(P)H oxidation via the rotenone-insensitive pathway is significantly reduced in the Atndi1 mutant plant line; the in vitro translation product of AtNDI1 is imported into isolated mitochondria and located on the inside of…
0.288251	0.334699	AT5G42590	CYP71A16	MARNERAL OXIDASE (MRO);CYTOCHROME P450, FAMILY 71, SUBFAMILY A, POLYPEPTIDE 16 (CYP71A16)	putative cytochrome P450
0.577591	0.334794	AT4G22470		DOUBLE HYBRID PROLINE-RICH PROTEIN 1 (DHYPRP1); (ATDHYPRP1)	Encodes a hybrid proline-rich protein that contains two tandem PRD-8CMs (proline-rich domain-eight cysteine motif) that is involved in systemic acquired resistance.
0.0131926	0.335092	AT5G15290	CASP5	CASPARIAN STRIP MEMBRANE DOMAIN PROTEIN 5 (CASP5)	Uncharacterized protein family (UPF0497);(source:Araport11)
0.290351	0.33686	AT4G17460	HAT1	JAIBA (JAB); (HAT1)	Encodes a class II HD-ZIP protein that regulates meristematic activity in different tissues, and that it is necessary for the correct formation of the gynoecium.
0.556331	0.337857	AT5G57560	TCH4,XTH22	TOUCH 4 (TCH4); (ATXTH22);XYLOGLUCAN ENDOTRANSGLUCOSYLASE/HYDROLASE 22 (XTH22)	Encodes a cell wall-modifying enzyme, rapidly upregulated in response to environmental stimuli.
0.543147	0.340102	AT1G13540			hypothetical protein (DUF1262);(source:Araport11)
1.3617	0.340426	AT5G62330			hypothetical protein;(source:Araport11)
0.343251	0.34202	AT4G02890	UBQ14	(UBQ14)	Polyubiquitin gene containing 4 ubiquitin repeats.
0	0.342466	AT5G41730			Protein kinase family protein;(source:Araport11)
1.71875	0.34375	AT4G20920			double-stranded RNA-binding domain (DsRBD)-containing protein;(source:Araport11)
0.528932	0.345198	AT4G37770		1-AMINO-CYCLOPROPANE-1-CARBOXYLATE SYNTHASE 8 (ACS8)	Encodes an auxin inducible ACC synthase.
0.654762	0.345238	AT3G46230	HSP17.4	ARABIDOPSIS THALIANA HEAT SHOCK PROTEIN 17.4 (ATHSP17.4);HEAT SHOCK PROTEIN 17.4 (HSP17.4)	Member of the class I small heat-shock protein (sHSP) family, which accounts for the majority of sHSPs in maturing seeds.Induced by heat, cold, salt, drought and high-light.
0.230769	0.346154	AT5G22560			transmembrane protein, putative (DUF247);(source:Araport11)
0.803545	0.346416	AT3G13310		DNA J PROTEIN C66 (DJC66)	Chaperone DnaJ-domain superfamily protein;(source:Araport11)
0.358156	0.346505	AT3G28220			TRAF-like family protein;(source:Araport11)
0.630435	0.347826	AT4G33465		SCR-LIKE 22 (SCRL22)	Encodes a member of a family of small, secreted, cysteine rich proteins with sequence similarity to SCR (S locus cysteine-rich protein).
0.0869565	0.347826	AT5G58784	DDS5,CPT5		Undecaprenyl pyrophosphate synthetase family protein;(source:Araport11)
0.289855	0.347826	AT4G13900		RECEPTOR LIKE PROTEIN 49 (RLP49);RECEPTOR LIKE PROTEIN 49 (AtRLP49)	pseudogene of receptor like protein 47;(source:Araport11)
0.227273	0.348485	AT5G18560	PUCHI	(PUCHI)	Encodes PUCHI, a member of the ERF (ethylene response factor) subfamily B-1 of ERF/AP2 transcription factor family. The protein contains one AP2 domain. There are 15 members in this subfamily including ATERF-3, ATERF-4, ATERF-7, and leafy petiole. PUCHI is required for morphogenesis in the early lateral root primordium of Arabidopsis. Expressed in early floral meristem (stage 1 to 2). Required fo…
1.09302	0.348837	AT1G61550			S-locus lectin protein kinase family protein;(source:Araport11)
0.53462	0.349465	AT3G47340	ASN1	GLUTAMINE-DEPENDENT ASPARAGINE SYNTHASE 1 (ASN1);ARABIDOPSIS THALIANA GLUTAMINE-DEPENDENT ASPARAGINE SYNTHASE 1 (AT-ASN1);DARK INDUCIBLE 6 (DIN6)	encodes a glutamine-dependent asparagine synthetase, the predicted ASN1 peptide contains a purF-type glutamine-binding domain, and is expressed predominantly in shoot tissues, where light has a negative effect on its mRNA accumulation. Expression is induced within 3 hours of dark treatment, in senescing leaves and treatment with exogenous photosynthesis inhibitor. Induction of gene expression was…
0.208163	0.35102	AT2G37820			Cysteine/Histidine-rich C1 domain family protein;(source:Araport11)
0.108108	0.351351	AT1G70640	PB1 domain prot.		octicosapeptide/Phox/Bem1p (PB1) domain-containing protein;(source:Araport11)
0.777778	0.351852	AT4G13000			AGC (cAMP-dependent, cGMP-dependent and protein kinase C) kinase family protein;(source:Araport11)
0.779805	0.35219	AT1G72930		TOLL/INTERLEUKIN-1 RECEPTOR-LIKE (TIR); (ATTN10);TIR-NUCLEOTIDE BINDING SITE FAMILY 10 (TN10)	Toll/interleukin-1 receptor-like protein (TIR) mRNA,
0.473458	0.352941	AT3G29670		PHENOLIC GLUCOSIDE MALONYLTRANSFERASE 2 (PMAT2)	Encodes a malonyltransferase that may play a role in phenolic xenobiotic detoxification. The mRNA is cell-to-cell mobile.
0.544118	0.352941	AT5G07760			formin homology 2 domain-containing protein / FH2 domain-containing protein;(source:Araport11)
0.591536	0.353646	AT2G43590			Chitinase family protein;(source:Araport11)
0.281517	0.354637	AT1G29395	COR413IM1	COLD REGULATED 414 THYLAKOID MEMBRANE 1 (COR414-TM1); (DEG25);COLD REGULATED 314 THYLAKOID MEMBRANE 1 (COR413-TM1);COLD REGULATED 314 INNER MEMBRANE 1 (COR413IM1)	Integral membrane protein in the inner envelope of chloroplasts. Provide freezing tolerance. Expression is induced by short-term cold-treatment, water deprivation, and abscisic acid treatment. involved in response to salt tolerance
0.494071	0.355731	AT1G61750			Receptor-like protein kinase-related family protein;(source:Araport11)
0.256734	0.356535	AT3G49780	PSK4	PHYTOSULFOKINE 4 PRECURSOR (ATPSK4);PHYTOSULFOKINE 4 PRECURSOR (PSK4); (ATPSK3 (FORMER SYMBOL))	Phytosulfokine 3 precursor, coding for a unique plant peptide growth factor. Plants overexpressing this gene (under a 35S promoter), develop normal cotyledons and hypocotyls but their growth, in particular that of their roots, was faster than that of wildtype.
2.94643	0.357143	AT5G55150		FBOX/DUF295-RELATED 2 (ATFDR2)	F-box SKIP23-like protein (DUF295);(source:Araport11)
0.357143	0.357143	AT1G49100			Leucine-rich repeat protein kinase family protein;(source:Araport11)
0.621622	0.358108	AT5G10140		FLOWERING LOCUS C (FLC);REDUCED STEM BRANCHING 6 (RSB6);AGAMOUS-LIKE 25 (AGL25);FLOWERING LOCUS F (FLF)	MADS-box protein encoded by FLOWERING LOCUS C - transcription factor that functions as a repressor of floral transition and contributes to temperature compensation of the circadian clock. Expression is downregulated during cold treatment. Vernalization, FRI and the autonomous pathway all influence the state of FLC chromatin. Both maternal and paternal alleles are reset by vernalization, but their…
0.61019	0.358674	AT2G18690			transmembrane protein;(source:Araport11)
1.02778	0.361111	AT5G15360			transmembrane protein;(source:Araport11)
0.191819	0.36114	AT3G09220	LAC7	LACCASE 7 (LAC7)	putative laccase, a member of laccase family of genes (17 members in Arabidopsis).
0.765957	0.361702	DA397_mgp39
0.874362	0.361914	AT3G57520		SEED IMBIBITION 2 (AtSIP2);RAFFINOSE SYNTHASE 2 (RS2);SEED IMBIBITION 2 (SIP2)	SIP2 encodes a raffinose-specific alpha-galactosidase that catalyzes the breakdown of raffinose into alpha-galatose and sucrose. This enzyme may function in unloading raffinose from the phloem as part of sink metabolism. Although it was originally predicted to act as a raffinose synthase (RS), that activity was not observed for recombinant SIP2.
0.537313	0.362873	AT1G49860	GSTF14	GLUTATHIONE S-TRANSFERASE (CLASS PHI) 14 (GSTF14);GLUTATHIONE S-TRANSFERASE (CLASS PHI) 14 (ATGSTF14)	Encodes glutathione transferase belonging to the phi class of GSTs. Naming convention according to Wagner et al. (2002). The mRNA is cell-to-cell mobile.
0.460587	0.363215	AT5G45080		PHLOEM PROTEIN 2-A6 (PP2-A6);PHLOEM PROTEIN 2-A6 (AtPP2-A6)	phloem protein 2-A6;(source:Araport11)
0.454545	0.363636	AT1G23210		GLYCOSYL HYDROLASE 9B6 (GH9B6);GLYCOSYL HYDROLASE 9B6 (AtGH9B6)	glycosyl hydrolase 9B6;(source:Araport11)
1.82895	0.364035	AT5G64750		ABA REPRESSOR1 (ABR1)	Encodes a putative transcription factor containing an AP2 domain. Is a member of the ERF (ethylene response factor) subfamily B-4 of ERF/AP2 transcription factor family. Expressed in response to ABA, osmotic stress, sugar stress and drought. Mutants are hypersensitive to these stresses. May be involved in regulation of ABA mediated stress response. The mRNA is cell-to-cell mobile.
0.964706	0.364706	AT3G01760		LYSINE-HISTIDINE-LIKE TRANSPORTER 6 (LHT6)	Encodes an amino acid transporter expressed in the root that is involved in the uptake of acidic amino acids, glutamine and alanine, and probably phenylalanine.
1.65706	0.364883	AT5G25250	FLOT1	FLOTILLIN 1 (FLOT1)	Encodes a protein that is involved in a membrane microdomain-dependent, but clathrin-independent, endocytic pathway required for optimal seedling development. The mRNA is cell-to-cell mobile.
1.05769	0.365385	AT1G51480		RESISTANCE SILENCED GENE 1 (RSG1)	disease resistance protein (CC-NBS-LRR class) family protein;(source:Araport11)
1.60976	0.365854	AT5G56300		GIBBERELLIC ACID METHYLTRANSFERASE 2 (GAMT2)	A member of the Arabidopsis SABATH methyltransferase gene family. Encodes GAMT2, a methyltransferase that uses S-adenosine-L-methionine (SAM) as a methyl donor to methylate the carboxyl group of GAs, resulting in the methyl esters of GAs (MeGAs). Expressed most highly in the siliques during seed development.
0.0733945	0.366972	AT5G01280	BPP3	BASIC PROLINE-RICH PROTEIN3 (BPP3)	Encodes a microtubule-associated protein.
0.54659	0.367915	AT1G07390		RECEPTOR LIKE PROTEIN 1 (RLP1);RECEPTOR LIKE PROTEIN 1 (AtRLP1)	receptor like protein 1;(source:Araport11)
0.0305206	0.369838	AT3G10710	RHS12	ROOT HAIR SPECIFIC 12 (RHS12)	root hair specific 12;(source:Araport11)
0.360472	0.370745	AT5G65730	XTH6	XYLOGLUCAN ENDOTRANSGLUCOSYLASE/HYDROLASE 6 (XTH6)	xyloglucan endotransglucosylase/hydrolase 6;(source:Araport11)
1.31618	0.371324	AT4G25560		LONG AFTER FAR-RED LIGHT 1 (LAF1);MYB DOMAIN PROTEIN 18 (MYB18);MYB DOMAIN PROTEIN 18 (AtMYB18)	LAF1 is a R2R3-MYB transcription factor and positive regulator of the phyA photoresponse. Interaction of LAF1 with HFR1 stabilize the proteins against ubiquitination by COP1(AT2G32950) and subsequent degrations. Mutants have an elongated hypocotyl specifically under far-red light but retain wild-type responses to other light wavelengths.
1.11429	0.371429	AT1G13650			hypothetical protein;(source:Araport11)
0.354999	0.371456	AT4G27260	WES1	(WES1); (GH3.5)	encodes an IAA-amido synthase that conjugates Asp and other amino acids to auxin in vitro. Lines carrying insertions in this gene are hypersensitive to auxin. It is involved in camalexin biosynthesis via conjugating indole-3-carboxylic acid (ICA) and cysteine (Cys). The mRNA is cell-to-cell mobile.
0.568392	0.371534	AT5G06740		L-TYPE LECTIN RECEPTOR KINASE S.5 (LECRK-S.5)	Concanavalin A-like lectin protein kinase family protein;(source:Araport11)
0.414325	0.372515	AT5G27420	CNI1,ATL31	CARBON/NITROGEN INSENSITIVE 1 (CNI1);ARABIDOPSIS TOXICOS EN LEVADURA 31 (ATL31)	Encodes CNI1 (Carbon/Nitrogen Insensitive1) (also named as ATL31), a RING type ubiquitin ligase that functions in the Carbon/Nitrogen response for growth phase transition in Arabidopsis seedlings. The mRNA is cell-to-cell mobile.
0.594461	0.372949	AT4G08950		EXORDIUM (EXO)	Phosphate-responsive 1 family protein;(source:Araport11)
0.383266	0.373819	AT3G16440		MYROSINASE-BINDING PROTEIN-LIKE PROTEIN-300B (ATMLP-300B);MYROSINASE-BINDING PROTEIN-LIKE PROTEIN-300B (MLP-300B);MATERNAL EFFECT EMBRYO ARREST 36 (MEE36)	myrosinase-binding protein-like protein (AtMLP-300B) mRNA,
0.637982	0.373887	AT2G07718			Cytochrome b/b6 protein;(source:Araport11)
0.673469	0.37415	AT1G16140		WALL ASSOCIATED KINASE-LIKE 3 (WAKL3)	Encodes a predicted WAK-like receptor-like kinase with a cytoplasmic Ser/Thr protein kinase domain and an extracellular domain with EGF-like repeats.
0.377301	0.374233	AT2G45610			alpha/beta-Hydrolases superfamily protein;(source:Araport11)
1.26466	0.376301	AT3G46280			kinase-like protein;(source:Araport11)
0.311475	0.377049	AT1G03790	SOM	SOMNUS (SOM);TANDEM CCCH ZINC FINGER PROTEIN 4 (TZF4); (ATTZF4)	Encodes SOMNUS (SOM), a nucleus-localized CCCH-type zinc finger protein. SOM negatively regulates light-dependent seed germination downstream of PIL5 (AT2G20180).
0.395582	0.37751	AT5G49770			Leucine rich receptor kinase.
0.59002	0.377613	AT2G26560	PLA2A,PLP2	PHOSPHOLIPASE A 2A (PLP2); (PLAII ALPHA);PHOSPHOLIPASE A 2A (PLA2A);PATATIN-LIKE PROTEIN 2 (PLP2);PHOSPHOLIPASE A 2A (PLA IIA)	Encodes a lipid acyl hydrolase with wide substrate specificity that accumulates upon infection by fungal and bacterial pathogens. Protein is localized in the cytoplasm in healthy leaves, and in membranes in infected cells. Plays a role in cell death and differentially affects the accumulation of oxylipins. Contributes to resistance to virus.
0.128692	0.377637	AT1G12950	RSH2,DTX31	ROOT HAIR SPECIFIC 3 (RHS3);ROOT HAIR SPECIFIC 2 (RSH2);RELA/SPOT HOMOLOG 2 (RSH2); (ATDTX31);ROOT HAIR SPECIFIC 2 (RHS2)	root hair specific 2;(source:Araport11)
0.308271	0.37782	AT4G23200		CYSTEINE-RICH RLK (RECEPTOR-LIKE PROTEIN KINASE) 12 (CRK12)	Encodes a cysteine-rich receptor-like protein kinase.
0.277311	0.378151	AT1G07477			Natural antisense transcript overlaps with AT1G48100;(source:Araport11)
0.594595	0.378378	AT5G34825			transposable_element_gene;(source:Araport11);Mutator-like transposase family, has a 4.7e-76 P-value blast match to Q9ZQM3 /24-192 Pfam PF03108 MuDR family transposase (MuDr-element domain);(source:TAIR10)
0.459459	0.378378	AT3G06955			None;(source:Araport11)
0.670886	0.379747	AT1G30860			RING/U-box superfamily protein;(source:Araport11)
0.468635	0.380074	AT5G01550		L-TYPE LECTIN RECEPTOR KINASE VI.3 (LECRK-VI.3);LECTIN RECEPTOR KINASE A4.1 (LECRKA4.2)	Encodes LecRKA4.2, a member of the lectin receptor kinase subfamily A4 (LecRKA4.1 At5g01540; LecRKA4.2 At5g01550; LecRKA4.3 At5g01560). Together with other members of the subfamily, functions redundantly in the negative regulation of ABA response in seed germination.
0.765182	0.380198	AT3G54040			PAR1 protein;(source:Araport11)
0.48597	0.380299	AT2G05940		PBS1-LIKE 14 (PBL14);RPM1-INDUCED PROTEIN KINASE (RIPK)	Encodes a receptor-like cytoplasmic kinase that phosphorylates the host target RIN4, leading to the activation of a plant innate immune receptor RPM1.
0.630435	0.380435	AT1G72910			Nucleotide-binding, leucine-rich repeat (NLR) gene regulated by nonsense-mediated mRNA decay (NMD) genes UPF1 and UPF3.
0.761905	0.380952	DA397_mgp25
1.38095	0.380952	AT1G28480	GRX480	(GRX480); (GRXC9); (roxy19)	Encodes GRX480, a member of the glutaredoxin family that regulates protein redox state. GRX480 interacts with TGA factors and suppresses JA-responsive PDF1.2 transcription. GRX480 transcription is SA-inducible and requires NPR1. Maybe involved in SA/JA cross-talk. It has also been shown to interact with the transcription factor TGA2 and suppress ORA59 promoter activity.
0.264706	0.382353	AT2G15060			transposable_element_gene;(source:Araport11);CACTA-like transposase family (Tnp1/En/Spm), has a 1.8e-63 P-value blast match to ref|NP_189784.1| TNP1-related protein (Arabidopsis thaliana) (CACTA-element);(source:TAIR10)
1.01267	0.382626	AT1G80325			Natural antisense transcript overlaps with AT1G80320;(source:Araport11)
0.227273	0.383117	AT3G06460		ELO HOMOLOG 1 (ELO1)	ELO family protein containing a characteristic histidine motif which binds to AtCb5-B, interacts with AtBI-1
2.51667	0.383333	AT5G36925		ARACIN1 (ARACIN1)	hypothetical protein;(source:Araport11)
0.973558	0.383381	AT1G02920	GSTF7	GLUTATHIONE S-TRANSFERASE 7 (GSTF7); (ATGSTF8);GLUTATHIONE S-TRANSFERASE 11 (GST11); (ATGSTF7);ARABIDOPSIS GLUTATHIONE S-TRANSFERASE 11 (ATGST11)	Encodes glutathione transferase belonging to the phi class of GSTs. Naming convention according to Wagner et al. (2002).
0.646617	0.383459	DA397_mgp19
1.11604	0.384615	AT3G07195			RPM1-interacting protein 4 (RIN4) family protein;(source:Araport11)
1.985	0.384819	AT5G51440	HSP23.5	(HSP23.5)	HSP20-like chaperones superfamily protein;(source:Araport11)
0.481153	0.385809	AT5G19410		ATP-BINDING CASSETTE G23 (ABCG23)	ABC-2 type transporter family protein;(source:Araport11)
0.398461	0.386619	AT2G21910		CYTOCHROME P450, FAMILY 96, SUBFAMILY A, POLYPEPTIDE 5 (CYP96A5)	member of CYP96A
0.498062	0.386628	AT5G23190	CYP86B1	CYTOCHROME P450, FAMILY 86, SUBFAMILY B, POLYPEPTIDE 1 (CYP86B1)	cytochrome P450 CYP86B1, nuclear gene for chloroplast product. CYP86B1 is a very long chain fatty acid hydroxylase specifically involved in polyester monomer biosynthesis during the course of plant development.
0.715762	0.387597	AT3G61970		NGATHA2 (NGA2)	AP2/B3-like transcriptional factor family protein;(source:Araport11)
0.472637	0.38806	AT5G45650			subtilase family protein;(source:Araport11)
0.424119	0.388889	AT3G05630	PLDP2	PHOSPHOLIPASE D P2 (PLDP2);PHOSPHOLIPASE D ZETA 2 (PLDZETA2);PHOSPHOLIPASE D ZETA 2 (PDLZ2)	Encodes a member of the PXPH-PLD subfamily of phospholipase D proteins. Regulates vesicle trafficking. Required for auxin transport and distribution and hence auxin responses. This subfamily is novel structurally different from the majority of plant PLDs by having phox homology (PX) and pleckstrin homology (PH) domains. Involved regulating root development in response to nutrient limitation. Play…
0.75	0.388889	AT4G32220			transposable_element_gene;(source:Araport11);gypsy-like retrotransposon family, has a 4.8e-57 P-value blast match to GB:AAD19359 polyprotein (gypsy_Ty3-element) (Sorghum bicolor);(source:TAIR10)
0.638889	0.388889	DA397_mgp07
0.488506	0.390805	AT5G06730			Peroxidase superfamily protein;(source:Araport11)
0.71243	0.391466	AT5G43290		ARABIDOPSIS THALIANA WRKY DNA-BINDING PROTEIN 49 (ATWRKY49);WRKY DNA-BINDING PROTEIN 49 (WRKY49)	member of WRKY Transcription Factor; Group II-c
0.429042	0.392534	AT1G80240		DUF642 L-GALL RESPONSIVE GENE 1 (DGR1)	DUF642 gene
0.807407	0.392593	AT1G13480			hypothetical protein (DUF1262);(source:Araport11)
0.479354	0.393216	AT1G11260		SUGAR TRANSPORTER 1 (ATSTP1);SUGAR TRANSPORTER 1 (STP1)	Encodes a H+/hexose cotransporter. The mRNA is cell-to-cell mobile.
0.340164	0.393443	AT4G12270			Copper amine oxidase family protein;(source:Araport11)
0.446592	0.393693	AT3G11430	GPAT5	GLYCEROL-3-PHOSPHATE SN-2-ACYLTRANSFERASE 5 (ATGPAT5);GLYCEROL-3-PHOSPHATE SN-2-ACYLTRANSFERASE 5 (GPAT5)	sn-glycerol-3-phosphate 2-O-acyltransferas, involved in the biosynthesis of suberin polyester.
0.578397	0.393728	AT1G04610		YUCCA 3 (YUC3)	Encodes a member of the YUC family that is expressed in the root apex and is ethylene inducible in the root.
7.12121	0.393939	AT1G07160			Protein phosphatase 2C family protein;(source:Araport11)
0.440634	0.394555	AT5G22500	FAR1	FATTY ACID REDUCTASE 1 (FAR1)	Encodes a member of the eight-member gene family encoding alcohol-forming fatty acyl-CoA reductases (FARs) identified in Arabidopsis thaliana. Three of the FARs, FAR1 (At5g22500), FAR4 (At3g44540) and FAR5 (At3g44550), are shown to generate the fatty alcohols found in root, seed coat, and wound-induced leaf tissue.
0.464912	0.394737	AT3G14530	GFPPS1	GERANYL-FARNESYL PYROPHOSPHATE SYNTHASE 1 (GFPPS1);ISOPRENYL DIPHOSPHATE SYNTHASE6 (IDS6);GERANYLGERANYL PYROPHOSPHATE SYNTHASE 6 (ATGGPS6);GERANYLGERANYL PYROPHOSPHATE SYNTHASE 6 (GGPPS6)	Chloroplast localized GFDP synthase.
0.888158	0.394737	AT1G55390			Cysteine/Histidine-rich C1 domain family protein;(source:Araport11)
1.04828	0.394828	AT1G19020		HYPOXIA RESPONSE UNKNOWN PROTEIN 35 (HUP35);SMALL DEFENSE-ASSOCIATED PROTEIN 1 (SDA1)	Modulates defense against bacterial pathogens and tolerance to oxidative stress.
0.0517711	0.395095	AT3G21180	ACA9	(ATACA9);AUTOINHIBITED CA(2+)-ATPASE 9 (ACA9)	one of the type IIB calcium pump isoforms. encodes an autoinhibited Ca(2+)-ATPase that contains an N-terminal calmodulin binding autoinhibitory domain.
0.155909	0.395233	AT5G52790	CBS domain protein		CBS domain protein with a domain protein (DUF21);(source:Araport11)
0.499843	0.395869	AT1G64660	MGL	METHIONINE GAMMA-LYASE (ATMGL);METHIONINE GAMMA-LYASE (MGL)	Encodes a functional methionine gamma-lyase, a cytosolic enzyme catalyzes the degradation of methionine into methanethiol, alpha-ketobutyrate and ammonia. The catabolism of excess methionine is important to methionine homeostasis. The mRNA is cell-to-cell mobile.
1.35472	0.396226	AT1G74010			Calcium-dependent phosphotriesterase superfamily protein;(source:Araport11)
0.893297	0.396717	AT4G08040		1-AMINOCYCLOPROPANE-1-CARBOXYLATE SYNTHASE 11 (ACS11)	encodes an aminotransferase that belongs to ACC synthase gene family structurally
0.27758	0.396797	AT2G16760			Calcium-dependent phosphotriesterase superfamily protein;(source:Araport11)
0.577236	0.398374	AT2G04090			MATE efflux family protein;(source:Araport11)
0.570992	0.399695	AT1G30700	BBE8	(ATBBE8)	FAD-binding Berberine family protein;(source:Araport11)
0.4	0.4	AT2G38152			alpha 1,4-glycosyltransferase family protein;(source:Araport11)
0.472464	0.4	AT1G54095			DUF1677 family protein, putative (DUF1677);(source:Araport11)
0.433333	0.4	AT5G65030			nitric oxide synthase-interacting protein;(source:Araport11)
0.309852	0.400286	AT1G20160	SBT5.2	(ATSBT5.2); (SBT5.2(A));CO2 RESPONSE SECRETED PROTEASE (CRSP)	Encodes two isoforms. One (SBT5.2(a) ) is a secreted, cell wall localized subtilisin-like serine protease that is involved in regulation of stomatal development. The second isoform (SBT5.2(b) is localized to endosomes.

## Sheet: S5. ZFP3-induced, short E
Table S5. Genes with increased expression (at least 2.5x) in ZFP3 overexpressing plants treated with estradiol for 6 hours (Short treatment).
Fold change/Short	Fold change/Long	AGI	Protein	Gene Symbols	Gene Model Description
857.731	141.703	AT5G25160	ZFP3	ZINC FINGER PROTEIN 3 (ZFP3)	Encodes a zinc finger protein containing only a single zinc finger.
96.0476	126.476	AT2G13547	unknown		hypothetical protein;(source:Araport11)
18.5455	4.27273	AT1G08090	NRT2:1	NITRATE TRANSPORTER 2:1 (ATNRT2:1);NITRATE TRANSPORTER 2 (NRT2); (NRT2;1AT);NITRATE TRANSPORTER 2:1 (NRT2:1);LATERAL ROOT INITIATION 1 (LIN1);NITRATE TRANSPORTER 2.1 (ATNRT2.1);NITRATE TRANSPORTER 2.1 (NRT2.1); (ACH1)	High-affinity nitrate transporter. Up-regulated by nitrate. Functions as a repressor of lateral root initiation independently of nitrate uptake.
16	8.16667	AT1G69588	CLE45	CLAVATA3/ESR-RELATED 45 (CLE45)	Belongs to a large gene family, called CLE for CLAVATA3/ESR-related, encoding small peptides with conserved carboxyl termini
13.75	0.5	AT4G15370	BARS1	PENTACYCLIC TRITERPENE SYNTHASE 2 (PEN2);BARUOL SYNTHASE 1 (BARS1)	Encodes an oxidosqualene cyclase that primarily produces the tetracyclic triterpene baruol in vitro and when expressed in yeast. It can also make 22 other minor triterpenoid products with varying numbers of rings.
13.5	7.5	AT1G09787			None;(source:Araport11)
13	4.88889	AT1G04500			CCT motif family protein;(source:Araport11)
12.2	1.3	AT5G24110	WRKY30	ARABIDOPSIS THALIANA WRKY DNA-BINDING PROTEIN 30 (ATWRKY30);WRKY DNA-BINDING PROTEIN 30 (WRKY30)	member of WRKY Transcription Factor; Group III
11.625	7.75	AT4G03275			novel transcribed region;(source:Araport11)
11.5	0.3	AT5G09125			None;(source:Araport11)
10.8571	4.61905	AT3G22100			basic helix-loop-helix (bHLH) DNA-binding superfamily protein;(source:Araport11)
10.4545	3.09091	AT3G09520		EXOCYST SUBUNIT EXO70 FAMILY PROTEIN H4 (EXO70H4);EXOCYST SUBUNIT EXO70 FAMILY PROTEIN H4 (ATEXO70H4)	A member of EXO70 gene family, putative exocyst subunits, conserved in land plants. Arabidopsis thaliana contains 23 putative EXO70 genes, which can be classified into eight clusters on the phylogenetic tree.
10	6.875	AT2G02620			Cysteine/Histidine-rich C1 domain family protein;(source:Araport11)
10	5.25	AT3G57210			hypothetical protein;(source:Araport11)
9.52381	4.28571	AT4G29150		IQ-DOMAIN 25 (IQD25)	Member of IQ67 (CaM binding) domain containing family.
9.42105	1.87719	AT3G49570	LSU3	RESPONSE TO LOW SULFUR 3 (LSU3)	response to low sulfur 3;(source:Araport11)
9.33333	1.5	AT5G37980			Zinc-binding dehydrogenase family protein;(source:Araport11)
9.32468	5.68831	AT4G33720	CAPE3	(ATCAPE3)	CAP (Cysteine-rich secretory proteins, Antigen 5, and Pathogenesis-related 1 protein) superfamily protein;(source:Araport11)
9.05263	10.6316	AT1G48100	PGX3	POLYGALACTURONASE INVOLVED IN EXPANSION3 (PGX3)	Pectin lyase-like superfamily protein;(source:Araport11)
8.8	8	AT4G06080			None;(source:Araport11)
8.04255	1.02128	AT1G05675			UDP-Glycosyltransferase superfamily protein;(source:Araport11)
8	5	AT1G09867			None;(source:Araport11)
8	7.28571	AT2G18180			Sec14p-like phosphatidylinositol transfer family protein;(source:Araport11)
7.70588	8.11765	AT4G27590	HMP37	HEAVY METAL ASSOCIATED PROTEIN 37 (ATHMP37)	Heavy metal transport/detoxification superfamily protein;(source:Araport11)
7.66667	4.53333	AT5G18740			hypothetical protein (DUF3444);(source:Araport11)
7.50128	0.890026	AT1G06160	ORA59	ETHYLENE RESPONSIVE FACTOR 59 (ERF59);OCTADECANOID-RESPONSIVE ARABIDOPSIS AP2/ERF 59 (ORA59)	encodes a member of the ERF (ethylene response factor) subfamily B-3 of ERF/AP2 transcription factor family. The protein contains one AP2 domain. There are 18 members in this subfamily including ATERF-1, ATERF-2, AND ATERF-5.
7.5	1.16667	AT3G01375			Natural antisense transcript overlaps with AT3G03920;(source:Araport11)
7.30435	0.869565	AT5G01881			transmembrane protein;(source:Araport11)
7.27778	4.61111	AT4G04220	RLP46	RECEPTOR LIKE PROTEIN 46 (AtRLP46);RECEPTOR LIKE PROTEIN 46 (RLP46)	receptor like protein 46;(source:Araport11)
7.1544	0.207479	AT5G61160	AACT1	P-COUMAROYL-COA:AGMATINE N4-P-COUMAROYL TRANSFERASE (ACT);ANTHOCYANIN 5-AROMATIC ACYLTRANSFERASE 1 (AACT1)	anthocyanin 5-aromatic acyltransferase 1;(source:Araport11)
7.12121	0.393939	AT1G07160			Protein phosphatase 2C family protein;(source:Araport11)
6.93333	1.46667	AT5G56960			basic helix-loop-helix (bHLH) DNA-binding family protein;(source:Araport11)
6.88889	3.88889	AT5G46140		DUF295 ORGANELLAR A 13 (ATDOA13)	hypothetical protein (DUF295);(source:Araport11)
6.85714	0.571429	AT1G09615			novel transcribed region;(source:Araport11)
6.72727	5	AT2G17330	CYP51G2	CYTOCHROME P450 51G2 (CYP51G2);CYTOCHROME P450 51A1 (CYP51A1)	putative obtusifoliol 14-alpha demethylase. Expressed pseudogene.
6.5	5.25	AT1G09715			novel transcribed region;(source:Araport11)
6.49383	2.7284	AT1G49620	ICK5	KIP-RELATED PROTEIN 7 (KRP7); (ATKRP7); (ICK5); (ICN6)	Kip-related protein (KRP) gene, encodes CDK (cyclin-dependent kinase) inhibitor (CKI), negative regulator of cell division. A member of seven KRP genes found in Arabidopsis thaliana. Differential expression patterns for distinct KRPs were revealed by in situ hybridization. Binds to D type cyclins and may inhibit cell cycle.
6.30769	3.76923	AT1G12030			phosphoenolpyruvate carboxylase, putative (DUF506);(source:Araport11)
6.28125	2.125	AT1G15625			E3 ubiquitin-protein ligase;(source:Araport11)
6.27627	0.138136	AT4G12500			Bifunctional inhibitor/lipid-transfer protein/seed storage 2S albumin superfamily protein;(source:Araport11)
6.21053	0.964912	AT5G67080	MAPKKK19	(MKK19);MITOGEN-ACTIVATED PROTEIN KINASE KINASE KINASE 19 (MAPKKK19)	member of MEKK subfamily
6.17778	0.933333	AT1G03980		PHYTOCHELATIN SYNTHASE 2 (PCS2);PHYTOCHELATIN SYNTHASE 2 (ATPCS2)	Encodes a protein with phytochelatin synthase activity which binds Cd2+ and Cd-glutathione complexes with high affinity. The protein has been postulated to be involved in Cd2+ tolerance. AtPCS2 expression appears to be less than that of AtPCS1, explaining the inability of endogenous AtPCS2 to substitute for AtPCS1 in the cad1-3 mutant (AtPCS1 null).
6.17647	2.52941	AT5G52710			Copper transport protein family;(source:Araport11)
6.04878	2.12195	AT2G32487			hypothetical protein;(source:Araport11)
6	3.71429	AT1G65130			Ubiquitin carboxyl-terminal hydrolase-related protein;(source:Araport11)
6	3.5	AT1G60970			SNARE-like superfamily protein;(source:Araport11)
6	6	AT1G49610			F-box family protein;(source:Araport11)
5.98837	1.38372	AT1G15520	ABCG40	PLEIOTROPIC DRUG RESISTANCE 12 (PDR12);ARABIDOPSIS THALIANA ATP-BINDING CASSETTE G40 (ATABCG40);ATP-BINDING CASSETTE G40 (ABCG40);PLEIOTROPIC DRUG RESISTANCE 12 (ATPDR12)	ABC transporter family involved in ABA transport and resistance to lead. Localizes to plasma membrane. Upregulated by lead. Expressed in leaves, flowers, stomata and roots.
5.83333	2.25	AT5G61455	U2.7	(U2.7)	U2-7;(source:Araport11)
5.73684	0.868421	AT5G48850	SDI1	SULPHUR DEFICIENCY-INDUCED 1 (SDI1);SULPHUR DEFICIENCY-INDUCED 1 (ATSDI1)	Homologous to the wheat sulphate deficiency-induced gene sdi1. Expression in root and leaf is induced by sulfur starvation. Knockout mutants retained higher root and leaf sulfate concentrations, indicating a role in regulation of stored sulfate pools.
5.70833	2.54167	AT5G62210			Embryo-specific protein 3, (ATS3);(source:Araport11)
5.625	6.875	AT5G33395			transposable_element_gene;(source:Araport11);CACTA-like transposase family (Ptta/En/Spm), has a 7.1e-27 P-value blast match to At5g59620.1/14-257 CACTA-like transposase family (Ptta/En/Spm) (CACTA-element) (Arabidopsis thaliana);(source:TAIR10)
5.61111	2.16667	AT1G56240	PP2-B13	PHLOEM PROTEIN 2-B13 (PP2-B13);PHLOEM PROTEIN 2-B13 (AtPP2-B13)	phloem protein 2-B13;(source:Araport11)
5.60989	1.41209	AT5G57010			calmodulin-binding family protein;(source:Araport11)
5.6	5.8	AT4G33355			Predicted to encode a PR (pathogenesis-related) protein. Belongs to the lipid transfer protein (PR-14) family with the following members: At2g38540/LTP1, At2g38530/LTP2, At5g59320/LTP3, At5g59310/LTP4, At3g51600/LTP5, At3g08770/LTP6, At2g15050/LTP7, At2g18370/LTP8, At2g15325/LTP9, At5g01870/LTP10, At4g33355/LTP11, At3g51590/LTP12, At5g44265/LTP13, At5g62065/LTP14, At4g08530/LTP15.
5.58333	2.58333	AT4G12200			transposable_element_gene;(source:Araport11);similar to polyprotein [Oryza sativa] (GB:BAB03249.1);(source:TAIR10)
5.52632	6.42105	AT5G53740			hypothetical protein;(source:Araport11)
5.5	4.5	AT3G02545			Natural antisense transcript overlaps with AT3G12520;(source:Araport11)
5.5	3.125	AT1G68480	JAG	JAGGED (JAG)	Encodes a putative zinc finger transcription factor that is necessary for proper lateral organ shape and is sufficient to induce the proliferation of lateral organ tissue. Together with NUB, it is involved in stamen and carpel development.
5.5	2.16667	AT2G43470			zinc finger CCCH domain protein, putative (DUF3755);(source:Araport11)
5.5	3.16667	AT3G57440			hypothetical protein;(source:Araport11)
5.33333	4.6	AT1G53660			Nucleotide/sugar transporter family protein
5.3125	5.625	AT4G30230			hypothetical protein;(source:Araport11)
5.30769	1.76923	AT2G35743			Pseudogene of AT2G35750; unknown protein
5.26695	2.31674	AT4G22212			Encodes a defensin-like (DEFL) family protein.
5.23333	1.76667	AT5G42445			pseudogene of R-protein L3 B;(source:Araport11)
5.23288	1.80822	AT1G23730	BCA3	BETA CARBONIC ANHYDRASE 3 (BCA3);BETA CARBONIC ANHYDRASE 3 (ATBCA3)	beta carbonic anhydrase 3;(source:Araport11)
5.2	0.866667	AT3G00400			novel transcribed region;(source:Araport11)
5.16053	1.18274	AT2G32530	CSLB03	CELLULOSE SYNTHASE-LIKE B3 (ATCSLB03);CELLULOSE SYNTHASE-LIKE B3 (ATCSLB3);CELLULOSE SYNTHASE-LIKE B3 (CSLB03)	encodes a gene similar to cellulose synthase
5.15099	5.88366	AT3G08770	LTP6	(ATLTPI-6);LIPID TRANSFER PROTEIN 6 (LTP6)	Predicted to encode a PR (pathogenesis-related) protein. Belongs to the lipid transfer protein (PR-14) family with the following members: At2g38540/LTP1, At2g38530/LTP2, At5g59320/LTP3, At5g59310/LTP4, At3g51600/LTP5, At3g08770/LTP6, At2g15050/LTP7, At2g18370/LTP8, At2g15325/LTP9, At5g01870/LTP10, At4g33355/LTP11, At3g51590/LTP12, At5g44265/LTP13, At5g62065/LTP14, At4g08530/LTP15.
5.125	2.25	AT3G05335			None;(source:Araport11)
5.11111	3.11111	AT5G02225			Natural antisense transcript overlaps with AT5G14440;(source:Araport11)
5.09302	3.4186	AT4G35810			2-oxoglutarate-dependent dioxygenase
5.08333	2.41667	AT3G20710			F-box family protein;(source:Araport11)
5.06757	2.54054	AT5G36670			RING/FYVE/PHD zinc finger superfamily protein;(source:Araport11)
5.04878	0.804878	AT2G47520		HYPOXIA RESPONSIVE ERF (ETHYLENE RESPONSE FACTOR) 2 (HRE2);ARABIDOPSIS THALIANA ETHYLENE RESPONSE FACTOR 71 (AtERF71);ETHYLENE RESPONSE FACTOR 71 (ERF71)	encodes a member of the ERF (ethylene response factor) subfamily B-2 of ERF/AP2 transcription factor family. The protein contains one AP2 domain. There are 5 members in this subfamily including RAP2.2 AND RAP2.12. It plays a role in hypoxia-induced root slanting.
5.03571	1.875	AT1G66465			transmembrane protein;(source:Araport11)
5.03229	7.51184	AT3G09390		METALLOTHIONEIN 2A (MT2A);ARABIDOPSIS THALIANA METALLOTHIONEIN-1 (ATMT-1);ARABIDOPSIS THALIANA METALLOTHIONEIN-K (ATMT-K)	metallothionein, binds to and detoxifies excess copper and other metals, limiting oxidative damage
4.92857	2.34416	AT1G43800	FTM1	FLORAL TRANSITION AT THE MERISTEM1 (FTM1);STEAROYL-ACYL CARRIER PROTEIN &#916;9-DESATURASE6 (SAD6);ACYL?ACYL CARRIER PROTEIN (ACP) DESATURASE 6 (AAD6);HYPOXIA RESPONSE UNKNOWN PROTEIN 7 (HUP7)	&#916;9 stearoyl-ACP desaturase which together with FAB2, AAD1, and AAD5 redundantly participates in oil storage during the maturation phase.
4.91667	2.58333	AT2G26010		PLANT DEFENSIN 1.3 (PDF1.3)	Predicted to encode a PR (pathogenesis-related) protein. Belongs to the plant defensin (PDF) family with the following members: At1g75830/PDF1.1, At5g44420/PDF1.2a, At2g26020/PDF1.2b, At5g44430/PDF1.2c, At2g26010/PDF1.3, At1g19610/PDF1.4, At1g55010/PDF1.5, At2g02120/PDF2.1, At2g02100/PDF2.2, At2g02130/PDF2.3, At1g61070/PDF2.4, At5g63660/PDF2.5, At2g02140/PDF2.6, At5g38330/PDF3.1 and At4g30070/PDF…
4.88889	1.61111	AT4G23215			pseudogene of cysteine-rich receptor-like protein kinase family protein
4.875	2	AT5G41380			CCT motif family protein;(source:Araport11)
4.85714	6.14286	AT5G59310	LTP4	(ATLTPI-11);LIPID TRANSFER PROTEIN 4 (LTP4)	Encodes a member of the lipid transfer protein family. Proteins of this family are generally small (~9 kD), basic, expressed abundantly and contain eight Cys residues. The proteins can bind fatty acids and acylCoA esters and can transfer several different phospholipids. They are localized to the cell wall. The mRNA is present in flowers and siliques, and is strongly up-regulated by abscisic acid.…
4.85714	4	AT1G51538			Aminotransferase-like, plant mobile domain family protein;(source:Araport11)
4.81579	4.60526	AT5G65350	HTR11	HISTONE 3 11 (HTR11)	histone 3 11;(source:Araport11)
4.8125	2.25	AT1G04880		ARID-HMG DNA-BINDING PROTEIN 15 (HMGBD15);ARID-HMG DNA-BINDING PROTEIN 15 (AtHMGB15)	Encodes a ARID-HMG DNA-binding protein that functions in pollen tube growth through the regulation of gene expression by interacting with the transcription factors AGL66 and AGL104.
4.8	4.4	AT4G23015			transmembrane protein;(source:Araport11)
4.787	3.18051	AT1G26380	FOX1	FAD-LINKED OXIDOREDUCTASE 1 (FOX1); (ATBBE3);FAD-LINKED OXIDOREDUCTASE (FOX)	Functions in the biosynthesis of 4-hydroxy indole-3-carbonyl nitrile (4-OH-ICN), a cyanogenic phytoalexin in Arabidopsis. FOX1 acts as a dehydrogenase on indole cyanohydrin to form indole carbonyl nitrile.
4.77372	2.83942	AT4G03060	AOP2	ALKENYL HYDROXALKYL PRODUCING 2 (AOP2)	Encodes a truncated and null function protein, due to a 5-bp deletion in cDNA. The functional allele in ecotype Cvi, AOP2, encodes a 2-oxoglutarate-dependent dioxygenase which is involved in glucosinolate biosynthesis. The natural variation in this locus explains the diversification of alkenyl glucosinolate among different ecotypes of Arabidopsis.
4.73684	2.94737	AT1G61470		CCR4-ASSOCIATED FACTOR 1E (CAF1E)	Deadenylase.
4.73235	1.32348	AT3G13650			Disease resistance-responsive (dirigent-like protein) family protein;(source:Araport11)
4.71429	2	AT3G56600			phosphatidylinositol 4-kinase gamma-like protein;(source:Araport11)
4.70732	2.19512	AT3G49630			2-oxoglutarate (2OG) and Fe(II)-dependent oxygenase superfamily protein;(source:Araport11)
4.67213	1.14754	AT3G29000			Calcium-binding EF-hand family protein;(source:Araport11)
4.66667	0.333333	AT2G42065			DnaJ domain protein;(source:Araport11)
4.66667	4.16667	AT5G00760			None;(source:Araport11)
4.625	2.75	AT2G09525			None;(source:Araport11)
4.6	2	AT4G23320		CYSTEINE-RICH RLK (RECEPTOR-LIKE PROTEIN KINASE) 24 (CRK24)	Encodes a cysteine-rich receptor-like protein kinase.
4.58974	1.53846	AT5G19110			Eukaryotic aspartyl protease family protein;(source:Araport11)
4.57143	2.62857	AT2G05765			snoRNA;(source:Araport11)
4.5566	5.28302	AT3G42658		SADHU NON-CODING RETROTRANSPOSON 3-2 (SADHU3-2)	Member of Sadhu non-coding retrotransposon family.In some natural accessions the allele is methylated and silenced.
4.52941	7.58824	AT1G04295			Natural antisense transcript overlaps with AT1G04290;(source:Araport11)
4.5	4.75	AT5G09976			hypothetical protein;(source:Araport11)
4.5	4.33333	AT2G00430			novel transcribed region;(source:Araport11)
4.49466	2.61922	AT5G17450		HEAVY METAL ASSOCIATED ISOPRENYLATED PLANT PROTEIN 21 (HIPP21);HEAVY METAL ASSOCIATED PROTEIN 45 (ATHMP45)	Heavy metal transport/detoxification superfamily protein;(source:Araport11)
4.47826	2.08696	AT2G04375	U2-10		U2;(source:Araport11)
4.44444	4.35556	AT5G64910			Serine/Threonine-kinase;(source:Araport11)
4.44	0.78	AT1G28370	ERF11	ERF DOMAIN PROTEIN 11 (ATERF11);ERF DOMAIN PROTEIN 11 (ERF11)	encodes a member of the ERF (ethylene response factor) subfamily B-1 of ERF/AP2 transcription factor family. The protein contains one AP2 domain. There are 15 members in this subfamily including ATERF-3, ATERF-4, ATERF-7, and leafy petiole.
4.42857	4.71429	AT1G09975			novel transcribed region;(source:Araport11)
4.41176	0.588235	AT5G28230			pseudogene of glucose-6-phosphate/phosphate translocator 2;(source:Araport11)
4.4	3.2	AT5G08855			None;(source:Araport11)
4.3871	1.77419	AT1G19320			Pathogenesis-related thaumatin superfamily protein;(source:Araport11)
4.34615	4.34615	AT1G12805			nucleotide binding protein;(source:Araport11)
4.32	2.96	AT2G02380	GSTZ2	GLUTATHIONE S-TRANSFERASE (CLASS ZETA) 2 (GSTZ2);GLUTATHIONE S-TRANSFERASE (CLASS ZETA) 2 (ATGSTZ2)	Encodes glutathione transferase belonging to the zeta class of GSTs. Naming convention according to Wagner et al. (2002).
4.3	4.05	AT1G07167			None;(source:Araport11)
4.29044	2.39706	AT3G13710		PRENYLATED RAB ACCEPTOR 1.F4 (PRA1.F4)	prenylated RAB acceptor 1.F4;(source:Araport11)
4.28571	4.57143	AT5G27893			transmembrane protein;(source:Araport11)
4.2549	3.54902	AT2G28210		ALPHA CARBONIC ANHYDRASE 2 (ACA2);ALPHA CARBONIC ANHYDRASE 2 (ATACA2)	alpha carbonic anhydrase 2;(source:Araport11)
4.22727	1.54545	AT5G52760			Copper transport protein family;(source:Araport11)
4.21429	1.85714	AT1G06553			None;(source:Araport11)
4.19048	4.85714	AT2G18660		EXPANSIN-LIKE B3 PRECURSOR (EXLB3); (AtPNP-A);PLANT NATRIURETIC PEPTIDE A (PNP-A)	Encodes PNP-A (Plant Natriuretic Peptide A). PNPs are a class of systemically mobile molecules distantly related to expansins; their biological role has remained elusive. PNP-A contains a signal peptide domain and is secreted into the extracellular space. Co-expression analyses using microarray data suggest that PNP-A may function as a component of plant defence response and SAR in particular, an…
4.18367	4.73469	AT1G13609			Encodes a defensin-like (DEFL) family protein.
4.16667	4.79167	AT1G52120			Mannose-binding lectin superfamily protein;(source:Araport11)
4.16667	5.41667	AT3G27920	GL1,MYB0	GLABRA 1 (GL1);MYB DOMAIN PROTEIN 0 (ATMYB0);MALAMBRUNO3 (MAU3);MYB DOMAIN PROTEIN 0 (MYB0); (ATGL1)	Encodes GL1, a Myb-like protein that is required for induction of trichome development. Interacts with JAZ and DELLA proteins to regulate trichome initiation. Natural hyperfunctional alleles producing trichome development in fruits and pedicels have been found.
4.16471	1.6	AT3G18450			PLAC8 family protein;(source:Araport11)
4.13333	1.86667	AT1G68290		ENDONUCLEASE 2 (ENDO2); (ATBFN2)	Encodes an endonuclease ENDO2. ENDO2 purified from transgenic Arabidopsis digests RNA, ssDNA, and dsDNA, with a substrate preference for ssDNA and RNA. ENDO2 produced and purified from Nicotiana benthamiana expression showed no demonstrable endonuclease activity, either towards single stranded DNA or mismatches, in vitro.
4.11683	1.90099	AT2G04755			Natural antisense transcript overlaps with AT2G04280;(source:Araport11)
4.10577	1.81731	AT1G06830		CEP DOWNSTREAM 1 (CEPD1); (ROXY6)	Encodes a member of the CC-type glutaredoxin (ROXY) family that has been shown to interact with the transcription factor TGA2. CEPD1 is a non secreted polypeptide that is highly similar to CEPD2 which is another member of a novel family related to glutaredoxins. It is induced by nitrogen starvation. It acts downstream of the CEP1 peptide in systemic N-demand signalling .The RNA is expressed in th…
4.1	2.1	AT5G60910	AGL8	FRUITFULL (FUL);AGAMOUS-LIKE 8 (AGL8)	MADS box gene negatively regulated by APETALA1
4.09155	1.72535	AT3G44450		BLUE-LIGHT INHIBITOR OF CRYPTOCHROMES 2 (BIC2)	Plant specific protein.BIC1 and BIC2 inhibit cryptochrome function by blocking blue light-dependent cryptochrome dimerization.Light activated transcription of BICs is mediated by cryptochromes.
4.08333	4.20833	AT2G00720			novel transcribed region;(source:Araport11)
4.08	2.12	AT3G57765		U2 SMALL NUCLEOLAR RNA3 (U2.3)	encodes a small nuclear RNA, which is a part of small nuclear ribonuclear particle (snRNP) and is involved in RNA processing such as splicing and polyadenylation.
4.08	4.52	AT5G15022			Natural antisense transcript overlaps with AT5G15030;(source:Araport11)
4.06349	2.61905	AT1G65484	STMP3	(STMP3)	Secreted peptide which functions in plant growth and pathogen defense.
4.0625	3.375	AT1G09475			novel transcribed region;(source:Araport11)
4.0625	1.6875	AT1G69930	GSTU11	GLUTATHIONE S-TRANSFERASE TAU 11 (GSTU11);GLUTATHIONE S-TRANSFERASE TAU 11 (ATGSTU11)	Encodes glutathione transferase belonging to the tau class of GSTs. Naming convention according to Wagner et al. (2002).
4.05943	1.94514	AT1G16410	CYP79F1	CYTOCHROME P450 79F1 (CYP79F1);SUPERSHOOT 1 (SPS1);BUSHY 1 (BUS1)	member of CYP79F The mRNA is cell-to-cell mobile.
4.05694	1.05338	AT1G65486	STMP4	(STMP4)	Secreted peptide which functions in plant growth and pathogen defense.
4.05594	4.0979	AT5G25090		(AtENODL13);EARLY NODULIN-LIKE PROTEIN 13 (ENODL13)	early nodulin-like protein 13;(source:Araport11)
4.01064	2.5	AT2G24110			pseudogene of ribosomal protein S11-beta;(source:Araport11)
4.00344	1.04811	AT3G13437		ENHANCER OF VASCULAR WILT RESISTANCE 1 (EWR1); (ATEWR1)	Brassicaceae specific gene. Overexpression results in Verticillium wilt resistance.
4	1.75	AT3G03190	GSTF11	GLUTATHIONE S-TRANSFERASE F11 (ATGSTF11);GLUTATHIONE S-TRANSFERASE F11 (GSTF11);ARABIDOPSIS GLUTATHIONE-S-TRANSFERASE 6 (ATGSTF6)	Encodes glutathione transferase belonging to the phi class of GSTs. Naming convention according to Wagner et al. (2002).
4	2.63636	AT5G59760			hypothetical protein (DUF1635);(source:Araport11)
4	4	AT2G28426			hypothetical protein;(source:Araport11)
4	2.07407	AT5G47130			Bax inhibitor-1 family protein;(source:Araport11)
4	2.8	AT2G09685			None;(source:Araport11)
4	0.625	AT3G02225			Natural antisense transcript overlaps with AT3G09700;(source:Araport11)
4	5.42105	AT1G22980			Grap2/cyclin-D-interacting protein;(source:Araport11)
4	3.57143	AT3G00790			novel transcribed region;(source:Araport11)
4	3.66667	AT3G28350			Pseudogene of AT3G28350; unknown protein
4	1.85714	AT5G25045			transposable_element_gene;(source:Araport11);copia-like retrotransposon family, has a 1.9e-186 P-value blast match to GB:AAB82754 retrofit (TY1_Copia-element) (Oryza longistaminata);(source:TAIR10)
3.98319	3.56303	AT3G45070	SULT202B1	SULFOTRANSFERASE 202B1 (SULT202B1); (ATSULT202B1)	Encodes a sulfotransferase with sulfating activity toward flavonoids.
3.97698	2.03607	AT3G44990	XTH31	XYLOGLUCAN ENDO-TRANSGLYCOSYLASE-RELATED 8 (XTR8); (ATXTH31);XYLOGLUCAN ENDOTRANSGLUCOSYLASE/HYDROLASE 31 (XTH31); (ATXTR8)	Encodes a xyloglucan endotransglycosylase/hydrolase. Protein sequence and phylogenetic analysis indicates that this enzyme resides in Group III-A of the XTH family, with high similarity to Tropaeolum majus (nasturtium) xyloglucanase 1 (TmNXG1).Enzyme kinetic analysis indicates predominant xyloglucan endo-hydrolase activity (EC 3.2.1.151) with only limited potential to act as a xyloglucan endo-tra…
3.97097	2.30893	AT2G02130		(PDF2.3);LOW-MOLECULAR-WEIGHT CYSTEINE-RICH 68 (LCR68)	Predicted to encode a PR (pathogenesis-related) protein. Belongs to the plant defensin (PDF) family with the following members: At1g75830/PDF1.1, At5g44420/PDF1.2a, At2g26020/PDF1.2b, At5g44430/PDF1.2c, At2g26010/PDF1.3, At1g19610/PDF1.4, At1g55010/PDF1.5, At2g02120/PDF2.1, At2g02100/PDF2.2, At2g02130/PDF2.3, At1g61070/PDF2.4, At5g63660/PDF2.5, At2g02140/PDF2.6, At5g38330/PDF3.1 and At4g30070/PDF…
3.96552	3.93103	AT5G01420			Glutaredoxin family protein;(source:Araport11)
3.95	1.75	AT1G01560	MPK11	MAP KINASE 11 (MPK11);MAP KINASE 11 (ATMPK11)	Member of MAP Kinase family. Flg22-induced activation is blocked by AvrRpt2.
3.94737	2.78947	AT1G02800		CELLULASE 2 (ATCEL2);CELLULASE 2 (CEL2); (CEL2)	Encodes a protein with similarity to endo-1,4-b-glucanases and is a member of Glycoside Hydrolase Family 9. CEL2 is induced by nemotodes and is expressed in syncitia induced by Heterodera schachtii.May be involved in the development and function of syncitia.
3.94118	2.82353	AT1G05833			Natural antisense transcript overlaps with AT1G23820;(source:Araport11)
3.93199	2.26789	AT5G61420	MYB28	MYB DOMAIN PROTEIN 28 (MYB28);HIGH ALIPHATIC GLUCOSINOLATE 1 (HAG1)	Encodes a nuclear localized member of the MYB transcription factor family. Involved in positive regulation of aliphatic glucosinolate biosynthesis.Expression is induced by touch, wounding and glucose.
3.92	4.28	AT4G07995			hypothetical protein;(source:Araport11)
3.91667	6.66667	AT1G47510	5PTASE11	INOSITOL POLYPHOSPHATE 5-PHOSPHATASE 11 (5PTASE11);ARABIDOPSIS THALIANA INOSITOL POLYPHOSPHATE 5-PHOSPHATASE 11 (AT5PTASE11)	Encodes a phosphatidylinositol polyphosphate 5-phosphatase. It can dephosphorylate PI(4,5)P2, PI(3,5)P2, and PI(3,4,5)P3, but, it is not active against PI(5)P or the water soluble inositol(1,4,5)P3 or inositol(1,3,4,5)P4. The transcript levels for this gene rise in response to auxin, ABA, and JA.
3.91304	1.65217	AT1G63040			a pseudogene member of the DREB subfamily A-4 of ERF/AP2 transcription factor family. The translated product contains one AP2 domain. There are 17 members in this subfamily including TINY.
3.90909	4.36364	AT3G19184	REM1	(REM1)	AP2/B3-like transcriptional factor family protein;(source:Araport11)
3.89474	2.07895	AT5G13830		(ATTRM7C);TRNA METHYLTRANSFERASE 7C (TRM7C)	FtsJ-like methyltransferase family protein;(source:Araport11)
3.89179	2.61567	AT1G62560	FMO GS-OX3	FLAVIN-MONOOXYGENASE GLUCOSINOLATE S-OXYGENASE 3 (FMO GS-OX3)	belongs to the flavin-monooxygenase (FMO) family, encodes a glucosinolate S-oxygenase that catalyzes the conversion of methylthioalkyl glucosinolates to methylsulfinylalkyl glucosinolates The mRNA is cell-to-cell mobile.
3.88462	1.26923	AT3G08675			Natural antisense transcript overlaps with AT3G56470;(source:Araport11)
3.86667	1.13333	AT1G04933			Natural antisense transcript overlaps with AT1G12150;(source:Araport11)
3.85882	1.77647	AT5G11590		TINY2 (TINY2)	encodes a member of the DREB subfamily A-4 of ERF/AP2 transcription factor family. The protein contains one AP2 domain. There are 17 members in this subfamily including TINY.
3.85714	2.07143	AT2G02310		PHLOEM PROTEIN 2-B6 (PP2-B6);PHLOEM PROTEIN 2-B6 (AtPP2-B6)	phloem protein 2-B6;(source:Araport11)
3.85	2.25	AT5G01775			None;(source:Araport11)
3.83333	3.91667	AT4G12580			hypothetical protein;(source:Araport11)
3.83333	3.16667	AT4G22110			GroES-like zinc-binding dehydrogenase family protein;(source:Araport11)
3.81481	6	AT4G24265			homeobox protein;(source:Araport11)
3.78723	2.21277	AT2G32210		CYSTEINE-RICH TRANSMEMBRANE MODULE 6 (ATHCYSTM6)	cysteine-rich/transmembrane domain A-like protein;(source:Araport11)
3.78378	3.91892	AT4G12870			Gamma interferon responsive lysosomal thiol (GILT) reductase family protein;(source:Araport11)
3.7807	4.65789	AT1G47395		FE-UPTAKE-INDUCING PEPTIDE2 (FEP2);IRONMAN 2 (IMA2)	Involved in regulation of iron deficiency response genes.
3.77778	4.72222	AT1G07373		IRONMAN 6 (IMA6)	Member of conserved family of peptides involved in Fe uptake and homeostasis.
3.76805	0.683911	AT4G21990		(ATAPR3);PAPS REDUCTASE HOMOLOG 26 (PRH26);APS REDUCTASE 3 (APR3); (PRH-26)	Encodes a protein disulfide isomerase-like (PDIL) protein, a member of a multigene family within the thioredoxin (TRX) superfamily. This protein also belongs to the adenosine 5'-phosphosulfate reductase-like (APRL) group.
3.75325	2.16883	AT5G00585	PROSCOOP3	(PROSCOOP3)	AT5G00585 (PROSCOOP3) is currently annotated as long noncoding RNA. The gene is composed of two exons (supported by several transcript assemblies) and including a small ORF. The CDS coordinates are : join(17958404..17958518,17959316..17959362) (Sebastien Aubourg, pers. communication)
3.75108	2.22078	AT1G65500	STMP6	(STMP6)	Secreted peptide which functions in plant growth and pathogen defense.
3.75	3.125	AT1G13400		NUBBIN (NUB);JAGGED-LIKE (JGL)	Along with JAG, it is involved in stamen and carpel development. Expression is limited to the adaxial side of lateral organs. Activated by AGAMOUS in a cal-1, ap1-1 background.
3.75	3	AT1G09745			novel transcribed region;(source:Araport11)
3.74815	1.74074	AT5G42830			HXXXD-type acyl-transferase family protein;(source:Araport11)
3.74757	3.52427	AT5G07690	MYB29	REGULATOR OF ALTERNATIVE OXIDASE 1A 7 (RAO7);PRODUCTION OF METHIONINE-DERIVED GLUCOSINOLATE 2 (PMG2);MYB DOMAIN PROTEIN 29 (ATMYB29);MYB DOMAIN PROTEIN 29 (MYB29)	Encodes a putative transcription factor (MYB29) that acts as a negative regulator of mitochondrial stress responses.
3.73913	1.82609	AT1G20065			DNA-directed RNA polymerase I subunit RPA12-like protein;(source:Araport11)
3.73913	8.26087	AT2G14560	LURP1	LATE UPREGULATED IN RESPONSE TO HYALOPERONOSPORA PARASITICA (LURP1)	Encodes LURP1, a member of the LURP cluster (late upregulated in response to Hyaloperonospora parasitica) which exhibits a pronounced upregulation after recognition of the pathogenic oomycte H. parasitica. LURP1 is required for full basal defense to H. parasitica and resistance to this pathogen mediated by the R-proteins RPP4 and RPP5. The mRNA is cell-to-cell mobile.
3.73077	3.30769	AT1G07270	CDC6B	(CDC6B)	Cell division control, Cdc6;(source:Araport11)
3.72203	1.40678	AT2G47550			Plant invertase/pectin methylesterase inhibitor superfamily;(source:Araport11)
3.7037	1.54321	AT3G48850		MITOCHONDRIAL PHOSPHATE TRANSPORTER 2 (MPT2);PHOSPHATE TRANSPORTER 3;2 (PHT3;2)	Encodes a mitochondrial phosphate transporter. Modulates plant responses to salt stress.
3.7	3.2	AT1G58007			multidrug resistance protein;(source:Araport11)
3.7	4.5	AT2G15130			Plant basic secretory protein (BSP) family protein;(source:Araport11)
3.69767	0.651163	AT4G01360		BYPASS 3 (BPS3)	Encodes a protein related to BYPASS1 (BPS1). Regulates production of mobile compound: bps signal.
3.69231	1.84615	AT3G44800			Meprin and TRAF (MATH) homology domain-containing protein;(source:Araport11)
3.67713	1.61433	AT3G58990	IPMI1,SSU3	ISOPROPYLMALATE ISOMERASE 1 (IPMI1); (IPMI SSU3)	Small subunit, which together with IPMI SSU1, IPMISSU2 and IPMI LSU1, is a member of heterodimeric isopropylmalate isomerase (IPMI). Together with IPMI SSU3 participates in the Met chain elongation pathway.
3.65696	0.744337	AT4G06746	RAP2.9	RELATED TO AP2 9 (RAP2.9);DREB AND EAR MOTIF PROTEIN 5 (DEAR5)	encodes a member of the DREB subfamily A-5 of ERF/AP2 transcription factor family (RAP2.9). The protein contains one AP2 domain. There are 16 members in this subfamily including RAP2.1 and RAP2.10.
3.65	4.6	AT4G08910			homeobox protein;(source:Araport11)
3.64286	2	AT1G51670		HEAT-INDUCED TAS1 TARGET 5 (HTT5)	hypothetical protein;(source:Araport11)
3.64286	0.857143	AT3G60120		BETA GLUCOSIDASE 27 (BGLU27)	beta glucosidase 27;(source:Araport11)
3.64286	1.78571	AT1G78815	LSH7	LIGHT SENSITIVE HYPOCOTYLS 7 (LSH7)	LIGHT-DEPENDENT SHORT HYPOCOTYLS-like protein (DUF640);(source:Araport11)
3.62245	1.84184	AT5G03390		DUF295 ORGANELLAR A 11 (ATDOA11)	hypothetical protein (DUF295);(source:Araport11)
3.61951	2.91707	AT1G12880		NUDIX HYDROLASE HOMOLOG 12 (NUDT12);NUDIX HYDROLASE HOMOLOG 12 (atnudt12)	nudix hydrolase homolog 12;(source:Araport11)
3.61905	1.61905	AT3G56825		U2 SMALL NUCLEOLAR RNA4 (U2.4)	U2-4;(source:Araport11)
3.6	2.2	AT5G16850		TELOMERASE REVERSE TRANSCRIPTASE (TERT);TELOMERASE REVERSE TRANSCRIPTASE (ATTERT)	Encodes the catalytic subunit of telomerase reverse transcriptase. Involved in telomere homeostasis. Homozygous double mutants with ATR show gross morphological defects over a period of generations. TERT shows Class II telomerase activity in vitro, indicating that it can initiate de novo telomerase synthesis on non-telomeric DNA, often using a preferred position within the telomerase-bound RNA. L…
3.59024	1.59763	AT1G60110			Mannose-binding lectin superfamily protein;(source:Araport11)
3.58929	1.26786	AT2G46400		WRKY DNA-BINDING PROTEIN 46 (WRKY46);WRKY DNA-BINDING PROTEIN 46 (ATWRKY46)	Encodes a WRKY transcription factor that contributes to the feedforward inhibition of osmotic/salt stress-dependent LR inhibition via regulation of ABA signaling and auxin homeostasis.
3.58824	0.764706	AT5G62730			Major facilitator superfamily protein;(source:Araport11)
3.58689	0.504274	AT5G24660	LSU2	RESPONSE TO LOW SULFUR 2 (LSU2)	response to low sulfur 2;(source:Araport11)
3.57895	3.42105	AT2G08760			None;(source:Araport11)
3.57542	1.10475	AT2G41178			Natural antisense transcript overlaps with AT2G41180;(source:Araport11)
3.57143	2.71429	AT1G06330		HEAVY METAL ASSOCIATED PROTEIN 2 (ATHMP02)	Heavy metal transport/detoxification superfamily protein;(source:Araport11)
3.56667	1.7	AT2G34360			MATE efflux family protein;(source:Araport11)
3.56667	2.86667	AT2G40180	PP2C5	PHOSPHATASE 2C5 (ATHPP2C5);PHOSPHATASE 2C5 (PP2C5)	Encodes PP2C5, a member of the PP2C family phosphatases. PP2C5 acts as a MAPK phosphatase that positively regulates seed germination, stomatal closure and ABA-inducible gene expression.
3.5625	3.5	AT3G03565			novel transcribed region; detected in root, carpel, receptacle, light-grown seedling, aerial;(source:Araport11)
3.5618	2.80899	AT3G16360		HPT PHOSPHOTRANSMITTER 4 (AHP4)	Encodes AHP4, a histidine-containing phosphotransmitter involved in Histidine (His)-to-Aspartate (Asp) phosphorelay signal transduction. AHP4 is one of the six Arabidopsis thaliana histidine phosphotransfer proteins (AHPs). AHPs function as redundant positive regulators of cytokinin signaling. Members of the AHP gene family include: AT3G21510 (AHP1), AT3G29350 (AHP2), AT5G39340 (AHP3), AT3G16360 …
3.56	2.69333	AT5G05365		HEAVY METAL ASSOCIATED PROTEIN 44 (ATHMP44)	Heavy metal transport/detoxification superfamily protein;(source:Araport11)
3.55556	1.88889	AT5G37050			sorting nexin;(source:Araport11)
3.55515	2.56973	AT1G78370	GSTU20	GLUTATHIONE S-TRANSFERASE TAU 20 (GSTU20);GLUTATHIONE S-TRANSFERASE TAU 20 (ATGSTU20)	Encodes glutathione transferase belonging to the tau class of GSTs. Naming convention according to Wagner et al. (2002).
3.55	3.1	AT3G11640			transmembrane protein;(source:Araport11)
3.54545	1.04545	AT3G55310			NAD(P)-binding Rossmann-fold superfamily protein;(source:Araport11)
3.53435	0.580153	AT1G21250	WAK1	CELL WALL-ASSOCIATED KINASE 1 (WAK1); (ATWAK1); (PRO25)	Encodes a cell wall-associated kinase that interacts with AtGRP3 and may function as a signaling receptor of extracellular matrix component such as oligogalacturonides. The mRNA is cell-to-cell mobile.
3.53107	0.576271	AT2G26150	HSFA2	HEAT SHOCK TRANSCRIPTION FACTOR A2 (ATHSFA2);HEAT SHOCK TRANSCRIPTION FACTOR A2 (HSFA2)	member of Heat Stress Transcription Factor (Hsf) family. Involved in response to misfolded protein accumulation in the cytosol. Regulated by alternative splicing and non-sense-mediated decay.
3.52632	2.31579	AT3G04510	LSH2	ORGAN BOUNDARY 2 (OBO2);LIGHT SENSITIVE HYPOCOTYLS 2 (LSH2)	LIGHT-DEPENDENT SHORT HYPOCOTYLS-like protein (DUF640);(source:Araport11)
3.525	1.25	AT5G41280			Receptor-like protein kinase-related family protein;(source:Araport11)
3.5	4.875	AT3G28500			60S acidic ribosomal protein family;(source:Araport11)
3.5	6.75	AT5G09735			None;(source:Araport11)
3.5	2.83333	AT5G44063			hypothetical protein;(source:Araport11)
3.5	1	AT5G52600	MYB82	MYB DOMAIN PROTEIN 82 (AtMYB82);MYB DOMAIN PROTEIN 82 (MYB82)	Encodes a nuclear-localized transcription activator that is a member of the R2R3 factor gene family. MYB82 and GL1 can form homodimers and heterodimers at R2R3-MYB domains. At least one of the two introns in MYB82 is essential to the protein?s trichome developmental function.
3.49793	0.737603	AT4G23210		CYSTEINE-RICH RLK (RECEPTOR-LIKE PROTEIN KINASE) 13 (CRK13)	Encodes a Cysteine-rich receptor-like kinase (CRK13). Overexpression of CRK13 leads to hypersensitive response cell death, and induces defense against pathogens by causing increased accumulation of salicylic acid.
3.48039	1.5098	AT5G39670		CALMODULIN-LIKE 46 (CML46)	Calmodulin like protein involved in negative regulation of pattern triggered immunity.
3.46316	0.852632	AT1G16160		WALL ASSOCIATED KINASE-LIKE 5 (WAKL5)	WAK-like kinase The mRNA is cell-to-cell mobile.
3.45684	0.965762	AT4G22690		CYTOCHROME P450, FAMILY 706, SUBFAMILY A, POLYPEPTIDE 1 (CYP706A1)	member of CYP706A The mRNA is cell-to-cell mobile.
3.45	0.933333	AT1G07887			Natural antisense transcript overlaps with AT1G53480;(source:Araport11)
3.44444	2.22222	AT3G57100			transmembrane protein, putative (DUF677);(source:Araport11)
3.44304	4.97468	AT1G04425			other_RNA;(source:Araport11)
3.43605	4.30814	AT4G00670			Remorin family protein;(source:Araport11)
3.42857	2.7381	AT1G67180			zinc finger (C3HC4-type RING finger) family protein / BRCT domain-containing protein;(source:Araport11)
3.42857	2.71429	AT5G01515			None;(source:Araport11)
3.42857	1.5	AT5G26190			Cysteine/Histidine-rich C1 domain family protein;(source:Araport11)
3.42308	1.11538	AT1G49370			pseudogene of Transmembrane amino acid transporter family protein;(source:Araport11)
3.41912	2.41176	AT4G10270		WOUND-INDUCED POLYPEPTIDE 4 (WIP4)	Member of the wound-induced polypeptide (WIP) family.
3.40864	0.857143	AT5G44568	STMP10	(STMP10); (PROSCOOP4)	Secreted peptide which functions in plant growth and pathogen defense.
3.39726	1.15068	AT5G41300			Receptor-like protein kinase-related family protein;(source:Araport11)
3.39474	2.34211	AT1G15190		FASCICLIN-LIKE ARABINOGALACTAN PROTEIN 19 (FLA19)	Fasciclin-like arabinogalactan protein. Possibly involved in embryogenesis and seed development.
3.39336	1.82464	AT4G22495			hypothetical protein;(source:Araport11)
3.38466	1.27642	AT3G28930		AVRRPT2-INDUCED GENE 2 (AIG2)	avrRpt2-induced gene that exhibits RPS2- and avrRpt2-dependent induction early after infection with Pseudomonas syringae pv maculicola strain ES4326 carrying avrRpt2
3.38462	1.38462	AT4G14695		MITOCHONDRIAL PYRUVATE CARRIER 2 (MPC2)	Uncharacterized protein family (UPF0041);(source:Araport11)
3.38298	0.914894	AT4G11170		RESISTANCE METHYLATED GENE 1 (RMG1)	Encodes RMG1 (Resistance Methylated Gene 1), a NB-LRR disease resistance protein with a Toll/interleukin-1 receptor (TIR) domain at its N terminus. RMG1 is expressed at high levels in response to flg22 and in naive met1/nrpd2 relative to wild-type plants. Expression of this gene is controlled by DNA methylation in its promoter region. The RMG1 promoter region is constitutively demethylated by act…
3.38272	1.08642	AT1G72520		ARABIDOPSIS THALIANA LIPOXYGENASE 4 (ATLOX4);LIPOXYGENASE 4 (LOX4)	PLAT/LH2 domain-containing lipoxygenase family protein;(source:Araport11)
3.38235	2.73529	AT5G55340			MBOAT (membrane bound O-acyl transferase) family protein;(source:Araport11)
3.37653	1.25739	AT4G39940	APK2,AKN2	ADENOSINE-5'-PHOSPHOSULFATE (APS) KINASE 2 (APK2);APS-KINASE 2 (AKN2)	adenosine-5'-phosphosulfate-kinase (akn2) mRNA, complete The mRNA is cell-to-cell mobile.
3.36842	1.37427	AT2G38250			Homeodomain-like superfamily protein;(source:Araport11)
3.36364	2.54545	AT2G00990			novel transcribed region;(source:Araport11)
3.36211	1.52915	AT2G46650		(CYTB5-C);CYTOCHROME B5 ISOFORM C (CB5-C);ARABIDOPSIS CYTOCHROME B5 ISOFORM C (ATCB5-C); (B5 #1)	member of Cytochromes b5 The mRNA is cell-to-cell mobile.
3.35135	1.34459	AT5G05420			FKBP-like peptidyl-prolyl cis-trans isomerase family protein;(source:Araport11)
3.35135	2.08108	AT4G26055			transmembrane protein;(source:Araport11)
3.33962	1.84906	AT1G11730			Galactosyltransferase family protein;(source:Araport11)
3.33333	6.5	AT1G12600			UDP-N-acetylglucosamine (UAA) transporter family;(source:Araport11)
3.33333	1.94444	AT2G04455	U2-10B/12		U2;(source:Araport11)
3.33333	0.75	AT2G15340			glycine-rich protein;(source:Araport11)
3.32258	1.93548	AT5G42040		REGULATORY PARTICLE NON-ATPASE 12B (RPN12b)	regulatory particle non-ATPase 12B;(source:Araport11)
3.32229	3.01172	AT1G79850		RIBOSOMAL PROTEIN S17 (RPS17);PIGMENT DEFECTIVE 347 (PDE347);PLASTID RIBOSOMAL SMALL SUBUNIT PROTEIN 17 (PRPS17); (CS17)	nuclear-encoded 30S chloroplast ribosomal protein S17
3.3125	3.625	AT4G38410			Dehydrin family protein;(source:Araport11)
3.30769	1.92308	AT1G04797			Natural antisense transcript overlaps with AT1G10522;(source:Araport11)
3.30769	3.07692	AT1G09835			novel transcribed region;(source:Araport11)
3.30612	1.85714	AT4G05815			Natural antisense transcript overlaps with AT4G10750;(source:Araport11)
3.29412	2	AT4G07705			novel transcribed region; detected in root, carpel, root apical meristem, receptacle, leaf, dark-grown seedling, light-grown seedling, flower, aerial, shoot apical meristem;(source:Araport11)
3.29268	4	AT4G26260		MYO-INOSITOL OXYGENASE 4 (MIOX4)	Encodes a myo-inositol oxygenase, which is the first enzyme in the inositol route to ascorbate (L&#8208;ascorbic acid, AsA, vitamin C). Overexpression results in enhanced biomass and abiotic stress tolerance.
3.29244	1.30449	AT1G16400	CYP79F2	CYTOCHROME P450, FAMILY 79, SUBFAMILY F, POLYPEPTIDE 2 (CYP79F2)	Encodes cytochrome P450 CYP79F2.
3.2872	1.21453	AT5G43420		ARABIDOPSIS TOXICOS EN LEVADURA 16 (ATL16)	RING/U-box superfamily protein;(source:Araport11)
3.28	5.08	AT2G38995			O-acyltransferase (WSD1-like) family protein;(source:Araport11)
3.27027	1.21622	AT3G27473			Cysteine/Histidine-rich C1 domain family protein;(source:Araport11)
3.26667	2.58519	AT5G67110		ALCATRAZ (ALC)	encodes a myc/bHLH transcription factor-like protein. Gene product is involved in fruit dehiscence. Mutant siliques fail to dehisce.
3.26506	1.9759	AT3G03200		NAC DOMAIN CONTAINING PROTEIN 45 (anac045);NAC DOMAIN CONTAINING PROTEIN 45 (NAC45);NAC DOMAIN CONTAINING PROTEIN 45 (NAC045)	NAC domain containing protein 45;(source:Araport11)
3.26471	1.17647	AT1G30282			Natural antisense transcript overlaps with AT1G30280;(source:Araport11)
3.26316	2.40602	AT4G29930			basic helix-loop-helix (bHLH) DNA-binding superfamily protein;(source:Araport11)
3.25623	1.05338	AT5G41750			Disease resistance protein (TIR-NBS-LRR class) family;(source:Araport11)
3.24088	2.77372	AT1G55200			kinase with adenine nucleotide alpha hydrolases-like domain-containing protein;(source:Araport11)
3.23077	1.19231	AT3G46090	ZAT7	(ZAT7)	C2H2 and C2HC zinc fingers superfamily protein;(source:Araport11)
3.23077	3.15385	AT4G06980			None;(source:Araport11)
3.23043	0.555365	AT3G16530			Lectin like protein whose expression is induced upon treatment with chitin oligomers.
3.21429	2.21429	AT5G03885			hypothetical protein;(source:Araport11)
3.21053	2.52632	AT3G63093			hypothetical protein;(source:Araport11)
3.20755	1.67296	AT4G37400		CYTOCHROME P450, FAMILY 81, SUBFAMILY F, POLYPEPTIDE 3 (CYP81F3)	member of CYP81F
3.20588	2.26471	AT1G16640			AP2/B3-like transcriptional factor family protein;(source:Araport11)
3.20455	3.07955	AT1G52700			alpha/beta-Hydrolases superfamily protein;(source:Araport11)
3.20435	0.852174	AT3G18610		NUCLEOLIN 2 (NUC2);RAN GTPASE-ACTIVATING PROTEIN 1 (ATRANGAP1);NUCLEOLIN LIKE 2 (NUC-L2);NUCLEOLIN LIKE 2 (ATNUC-L2);PARALLEL1-LIKE 1 (PARLL1)	Encodes ATNUC-L2 (NUCLEOLIN LIKE 2).
3.2	3.76	AT5G10890			myosin heavy chain-like protein;(source:Araport11)
3.2	3	AT4G11590			F-box associated ubiquitination effector family protein;(source:Araport11)
3.19892	4.00538	AT1G43590			transposable_element_gene;(source:Araport11);similar to unknown protein [Arabidopsis thaliana] (TAIR:AT5G34838.1);(source:TAIR10)
3.1906	0.775095	AT1G63530			hypothetical protein;(source:Araport11)
3.19048	1	AT5G61890	ERF114	(ERF114)	encodes a member of the ERF (ethylene response factor) subfamily B-4 of ERF/AP2 transcription factor family. The protein contains one AP2 domain. There are 7 members in this subfamily.
3.18246	2.74737	AT1G65860	FMO GS-OX1	FLAVIN-MONOOXYGENASE GLUCOSINOLATE S-OXYGENASE 1 (FMO GS-OX1)	belongs to the flavin-monooxygenase (FMO) family, encodes a glucosinolate S-oxygenase that catalyzes the conversion of methylthioalkyl glucosinolates to methylsulfinylalkyl glucosinolates
3.18219	0.840584	AT4G22710		CYTOCHROME P450, FAMILY 706, SUBFAMILY A, POLYPEPTIDE 2 (CYP706A2)	member of CYP706A
3.18182	0.836364	AT5G41290			Receptor-like protein kinase-related family protein;(source:Araport11)
3.18033	0.918033	AT3G09680			Ribosomal protein S12/S23 family protein;(source:Araport11)
3.17647	2.35294	AT4G10950		GDSL-TYPE ESTERASE/LIPASE 77 (GELP77)	GDSL-type esterase/lipase. Required for pollen development.
3.16667	2.83333	AT1G29860		WRKY DNA-BINDING PROTEIN 71 (WRKY71);EXCESSIVE BRANCHES1 (EXB1);WRKY DNA-BINDING PROTEIN 71 (ATWRKY71)	member of WRKY Transcription Factor; Group II-c
3.16667	2.5	AT2G08485			None;(source:Araport11)
3.13725	3.60784	AT1G65480	FT	REDUCED STEM BRANCHING 8 (RSB8);FLOWERING LOCUS T (FT)	FT, together with LFY, promotes flowering and is antagonistic with its homologous gene, TERMINAL FLOWER1 (TFL1). Together with TSF, it plays an antagonistic role to TFL1 in the determination of inflorescence meristem identity. FT is expressed in leaves and is induced by long day treatment. Either the FT mRNA or protein is translocated to the shoot apex where it induces its own expression. Recent …
3.13208	2.84906	AT2G37960			myosin-M heavy protein;(source:Araport11)
3.13023	0.981395	AT3G46110		(AUXRP3);SOSEKI4 (SOK4)	DUF966 domain containing protein, expressed during embryogenesis.
3.125	1.8125	AT2G46130		WRKY DNA-BINDING PROTEIN 43 (WRKY43);WRKY DNA-BINDING PROTEIN 43 (ATWRKY43)	member of WRKY Transcription Factor; Group II-c
3.125	3	AT5G50610			transmembrane protein;(source:Araport11)
3.125	3	AT5G50710			transmembrane protein;(source:Araport11)
3.125	2	AT3G22090			hypothetical protein;(source:Araport11)
3.125	5.125	AT2G45780			other_RNA;(source:Araport11)
3.125	3.02083	AT5G50930	MHF1	(ATMHF1);HOMOLOG OF HUMAN MHF1 (MHF1)	Encodes a protein with similarity to mammalian MHF1 that acts in the same pathway as FANCM to restrain class II meiotic crossing over, and acts with FANCM during meiosis and to repair cross-links. It also assumes an opposing role from FANCM in homologous recombination and only FANCM is essential for replicative repair in the absence of the endonuclease MUS81.
3.11111	1.33333	AT3G17690		CYCLIC NUCLEOTIDE GATED CHANNEL 19 (CNGC19);CYCLIC NUCLEOTIDE-GATED CHANNEL 19 (ATCNGC19)	member of Cyclic nucleotide gated channel family
3.11111	0.991453	AT2G41260	M17	(ATM17); (M17)	Late-embryogenesis-abundant gene. Involved in the acquisition of desiccation tolerance during late phase of embryogenesis.
3.11111	0.888889	AT3G04695			Natural antisense transcript overlaps with AT3G24503;(source:Araport11)
3.1	0.9	AT3G24900		RECEPTOR LIKE PROTEIN 39 (RLP39);RECEPTOR LIKE PROTEIN 39 (AtRLP39)	receptor like protein 39;(source:Araport11)
3.1	1.65	AT1G53542			hypothetical protein;(source:Araport11)
3.09091	2.81818	AT4G29760		HEAT-INDUCED TAS1 TARGET 4 (HTT4)	target of trans acting-siR480/255 protein;(source:Araport11)
3.09091	2.75758	AT5G00590			novel transcribed region;(source:Araport11)
3.08696	3.82609	AT1G60787			cysteine/histidine-rich C1 domain protein;(source:Araport11)
3.07692	1.53846	AT5G55650			transmembrane protein;(source:Araport11)
3.07143	1.96429	AT3G06020		FANTASTIC FOUR 4 (FAF4)	A member of the FAF family proteins encoded by the FANTASTIC FOUR (FAF) genes: AT4G02810 (FAF1), AT1G03170 (FAF2), AT5G19260 (FAF3) and AT3G06020 (FAF4). FAFs have the potential to regulate shoot meristem size in Arabidopsis thaliana. FAFs can repress WUS, which ultimately leads to an arrest of meristem activity in FAF overexpressing lines.
3.06907	1.34536	AT2G16660			Major facilitator superfamily protein;(source:Araport11)
3.06667	2.8	AT2G44840	ERF13	ETHYLENE-RESPONSIVE ELEMENT BINDING FACTOR 13 (ATERF13);ETHYLENE-RESPONSIVE ELEMENT BINDING FACTOR 13 (ERF13); (EREBP)	encodes a member of the ERF (ethylene response factor) subfamily B-3 of ERF/AP2 transcription factor family. The protein contains one AP2 domain. There are 18 members in this subfamily including ATERF-1, ATERF-2, AND ATERF-5. The mRNA is cell-to-cell mobile.
3.06306	2.27027	AT3G61113		UBIQUITIN-RELATED MODIFIER 12 (URM12)	Ubiquitin related modifier 1;(source:Araport11)
3.0625	3.15625	AT1G47990	GA2OX4	GIBBERELLIN 2-OXIDASE 4 (GA2OX4);ARABIDOPSIS THALIANA GIBBERELLIN 2-OXIDASE 4 (ATGA2OX4)	Encodes a gibberellin 2-oxidase that acts on C19 gibberellins. AtGA2OX4 expression is responsive to cytokinin and KNOX activities.
3.06024	3.01205	AT4G01270			RING/U-box superfamily protein;(source:Araport11)
3.05556	1.77778	AT5G25020			enhanced disease resistance-like protein (DUF1336);(source:Araport11)
3.04348	2.08696	AT3G05355			None;(source:Araport11)
3.03765	1.79181	AT4G12030	BAT5,BASS5	BILE ACID:SODIUM SYMPORTER FAMILY PROTEIN 5 (BASS5);BILE ACID TRANSPORTER 5 (BAT5)	Required for the biosynthesis of methionine-derived glucosinolates. Involved in the transport of 2-keto acids between chloroplasts and the cytosol.
3.03448	3.24138	AT1G73040			Mannose-binding lectin superfamily protein;(source:Araport11)
3.02881	1.90056	AT3G54600	DJ1F	(DJ-1F); (DJ1F)	Class I glutamine amidotransferase-like superfamily protein;(source:Araport11)
3.02	1.94	AT1G26240	EXT19	EXTENSIN 19 (EXT19)	Proline-rich extensin-like family protein;(source:Araport11)
3.01887	1.43396	AT1G79680	WAKL10	(ATWAKL10);WALL ASSOCIATED KINASE (WAK)-LIKE 10 (WAKL10)	Encodes a twin-domain, kinase-GC signaling molecule that may function in biotic stress responses that is critically dependent on the second messenger cGMP.
3.01639	2.03279	AT3G57500			fission regulator-like protein;(source:Araport11)
3.01149	1.31034	AT2G45080	CYCP3;1	CYCLIN P3;1 (cycp3;1)	cyclin p3;(source:Araport11)
3.00781	1.35938	AT1G61340		F-BOX STRESS INDUCED 1 (FBS1); (ATFBS1)	Encodes a F-box protein induced by various biotic or abiotic stress.
3	1.94872	AT2G28755			UDP-D-glucuronate carboxy-lyase-like protein;(source:Araport11)
3	4.8	AT5G24206			other_RNA;(source:Araport11)
3	2.75	AT5G16530	PIN5	PIN-FORMED 5 (PIN5)	Encodes PIN5, an atypical member of the PIN family. PIN5 is a functional auxin transporter that is required for auxin-mediated development. PIN5 does not have a direct role in cell-to-cell transport but regulates intracellular auxin homeostasis and metabolism. PIN5 localizes, unlike other characterized plasma membrane PIN proteins, to endoplasmic reticulum (ER), presumably mediating auxin flow fr…
3	3.59375	AT4G37810	EPFL2	(ATEPFL2); (EPFL2)	Memmber of the EPF/EPFL (epidermal patterning factor/EPF-like) gene family, which genes encode plant-specific secretory peptides, several of which play a role in controlling stomatal density and patterning in the plant epidermis.
3	2.11111	AT5G01505			None;(source:Araport11)
3	5.625	AT4G01735			polyhomeotic-like protein;(source:Araport11)
3	1.27273	AT2G45243			hypothetical protein;(source:Araport11)
3	1.13514	AT1G69920	GSTU12	GLUTATHIONE S-TRANSFERASE TAU 12 (GSTU12);ARABIDOPSIS THALIANA GLUTATHIONE S-TRANSFERASE TAU 12 (ATGSTU12)	Encodes glutathione transferase belonging to the tau class of GSTs. Naming convention according to Wagner et al. (2002).
3	0.736842	AT5G44306			This gene encodes a small protein and has either evidence of transcription or purifying selection.
2.99038	1.31508	AT3G04720		(PR-4);HEVEIN-LIKE (HEL);PATHOGENESIS-RELATED 4 (PR4); (ATPR4)	Encodes a protein similar to the antifungal chitin-binding protein hevein from rubber tree latex. mRNA levels increase in response to ethylene and turnip crinkle virus infection. The mRNA is cell-to-cell mobile.
2.9901	1.59406	AT1G68640		TGACG SEQUENCE-SPECIFIC BINDING PROTEIN 8 (TGA8);PERIANTHIA (PAN)	Encodes bZIP-transcription factor. Mutant plants have extra floral organs. PAN is essential for AG activation in early flowers of short-day-grown plants. Binds directly to 5'-AAGAAT-3'regulatory sequence in AG promoter.
2.98148	1.35185	AT1G64250			transposable_element_gene;(source:Araport11);Mutator-like transposase family, has a 2.2e-20 P-value blast match to GB:AAA21566 mudrA of transposon=MuDR (MuDr-element) (Zea mays);(source:TAIR10)
2.97826	2.08696	AT1G07903			None;(source:Araport11)
2.97714	1.2381	AT5G67350			hypothetical protein;(source:Araport11)
2.97627	0.299918	AT4G12490	AZI3	(AZI3)	Encodes a member of the AZI family of lipid transfer proteins. Contains a PRR domain that appears to be required for localization to the chloroplast.
2.97561	3.29268	AT3G57160			cysteine-rich TM module stress tolerance protein;(source:Araport11)
2.97403	3.48052	AT3G06778			Chaperone DnaJ-domain superfamily protein;(source:Araport11)
2.97382	1.64398	AT5G08360			Stu1, putative (DUF789);(source:Araport11)
2.97379	1.2348	AT1G18590	SOT17	SULFOTRANSFERASE 17 (SOT17);ARABIDOPSIS SULFOTRANSFERASE 5C (ATST5C);SULFOTRANSFERASE 17 (ATSOT17)	encodes a desulfoglucosinolate sulfotransferase, involved in the final step of glucosinolate core structure biosynthesis. Has a broad-substrate specificity with preference with methionine-derived desulfoglucosinolates.
2.96923	2.18462	AT5G03995			hypothetical protein;(source:Araport11)
2.96447	1.70558	AT1G65900			plant/protein;(source:Araport11)
2.96203	1.60759	AT4G15417		RNASE II-LIKE 1 (ATRTL1);RNASE II-LIKE 1 (RTL1)	RNAse II-like 1;(source:Araport11)
2.96203	1.62025	AT3G01990		ACT DOMAIN REPEAT 6 (ACR6)	Member of a small family of ACT domain containing proteins in Arabidopsis. ACT domains are involved in amino acid binding.
2.96154	1.57692	AT2G04965			None;(source:Araport11)
2.9604	3.13366	AT4G31805		POLAR LOCALIZATION DURING ASYMMETRIC DIVISION AND REDISTRIBUTION (POLAR)	Encodes POLAR, a scaffold protein associated with cellular asymmetry of meristemoids. Its transcript levels change after inducing MUTE expression in a mute background.
2.96	3.6	AT5G46220	TOD1	TURGOR REGULATION DEFECT 1 (TOD1)	Encodes a protein with alkaline ceramidase activity that is involved in regulation of turgor during pollen tube growth and silique stomatal movement. Tod1 is expressed specifically in pollen and silique guard cells. Loss of function mutations have reduced fertility due to defects in pollen transmission.
2.95833	1.33333	AT1G07175			alternative NAD(P)H dehydrogenase;(source:Araport11)
2.95745	1.78723	AT3G50825			snoRNA;(source:Araport11)
2.95683	1.19424	AT3G59850			Pectin lyase-like superfamily protein;(source:Araport11)
2.95652	1.95652	AT2G24700	REM32	(REM32)	Transcriptional factor B3 family protein;(source:Araport11)
2.95455	2.5	AT1G67370	ASY1	(ATASY1);ASYNAPTIC 1 (ASY1)	Meiotic asynaptic mutant 1 (ASY1). ASY1 protein is initially distributed as numerous foci throughout the chromatin. During early G2, the foci are juxtaposed to the nascent chromosome axes to form a continuous axis associated signal.
2.94792	2	AT5G57190		PHOSPHATIDYLSERINE DECARBOXYLASE 2 (PSD2)	Encodes the minor form of the two non-mitochondrail phosphatidylserine decarboxylase. The gene expression level is very low. Located at the tonoplast.
2.94545	2.18182	AT1G44740			hypothetical protein;(source:Araport11)
2.94444	4.01852	AT5G42700			AP2/B3-like transcriptional factor family protein;(source:Araport11)
2.94388	1.02041	AT5G04840			bZIP protein;(source:Araport11)
2.94118	1.29412	AT2G04955			None;(source:Araport11)
2.94007	1.73309	AT5G14200	IMD1	ISOPROPYLMALATE DEHYDROGENASE 1 (IMD1);ARABIDOPSIS ISOPROPYLMALATE DEHYDROGENASE 1 (ATIMD1)	The AtIMD1 is one out of 3 genes encoding the enzyme 3-isopropylmalate dehydrogenase involved in leucine biosynthesis in Arabidopsis. Its subcellular location has been targeted to plastids. Encodes methylthioalkylmalate dehydrogenase. Involved in glucosinolate biosynthesis, in methionine chain elongation. The mRNA is cell-to-cell mobile.
2.93478	4.47826	AT1G09797			None;(source:Araport11)
2.93213	1.87783	AT3G53650	HTB6	(HTB6)	Histone superfamily protein;(source:Araport11)
2.93182	4.75	AT5G06845			None;(source:Araport11)
2.92857	0.714286	AT4G35640		SERINE ACETYLTRANSFERASE 3;2 (SERAT3;2);SERINE ACETYLTRANSFERASE 3;2 (ATSERAT3;2)	Encodes a cytosolic serine O-acetyltransferase involved in sulfur assimilation and cysteine biosynthesis. Expressed in the vascular system. Expression is induced in both roots and shoots under sulfur-starved conditions.
2.92627	2.07373	AT2G36885			translation initiation factor;(source:Araport11)
2.92308	1.03846	AT5G09585		U2 SMALL NUCLEOLAR RNA5 (U2.5)	U2;(source:Araport11)
2.92208	1.98701	AT1G07897			None;(source:Araport11)
2.92	4.05714	AT2G14247			Expressed protein;(source:Araport11)
2.91822	2.20818	AT3G52630		REPLICATION PROTEIN A 3A (RPA3A)	Nucleic acid-binding, OB-fold-like protein;(source:Araport11)
2.91667	4.33333	AT4G26590		ARABIDOPSIS THALIANA OLIGOPEPTIDE TRANSPORTER 5 (ATOPT5);OLIGOPEPTIDE TRANSPORTER 5 (OPT5)	oligopeptide transporter
2.91489	2.08511	AT2G20721			snoRNA;(source:Araport11)
2.90769	1.76923	AT2G00880			novel transcribed region;(source:Araport11)
2.90698	4.97674	AT2G40670	RR16	RESPONSE REGULATOR 16 (RR16)	response regulator 16
2.90625	2.23438	AT3G49580	LSU1	RESPONSE TO LOW SULFUR 1 (LSU1)	response to low sulfur 1;(source:Araport11)
2.89881	1.56548	AT5G23480			SWIB/MDM2, Plus-3 and GYF domain-containing protein;(source:Araport11)
2.89757	2.20183	AT5G15120		HYPOXIA RESPONSE UNKNOWN PROTEIN 29 (HUP29);PLANT CYSTEINE OXIDASE 1 (PCO1)	2-aminoethanethiol dioxygenase, putative (DUF1637);(source:Araport11)
2.89677	1.81613	AT5G18065		HEAT-INDUCED TAS1 TARGET 3 (HTT3)	target of trans acting-siR480/255 protein;(source:Araport11)
2.89627	1.23237	AT5G64000	SAL2	(ATSAL2); (SAL2)	3'(2'),5'-bisphosphate nucleotidase
2.89474	3.14035	AT4G29030			Putative membrane lipoprotein;(source:Araport11)
2.89474	2.26316	AT1G58420			Uncharacterized conserved protein UCP031279;(source:Araport11)
2.88889	2.40741	AT1G11460		USUALLY MULTIPLE ACIDS MOVE IN AND OUT TRANSPORTERS 26 (UMAMIT26)	nodulin MtN21-like transporter family protein
2.88372	1.53488	AT3G01345			Expressed protein;(source:Araport11)
2.88235	2.04412	AT1G14750	Cyclin-SDS	SOLO DANCERS (SDS)	Encodes a meiotic cyclin-like protein, distinct from all other known Arabidopsis cyclins. It is not required for meiotic DSB formation but is necessary for meiotic DSB repair via the homologous chromosome.
2.8814	2.41163	AT2G02020		PEPTIDE TRANSPORTER 4 (PTR4); (ATNPF8.4);NRT1/ PTR FAMILY 8.4 (NPF8.4); (AtPTR4)	Major facilitator superfamily protein;(source:Araport11)
2.88082	2.51507	AT3G25570		S-ADENOSYLMETHIONINE DECARBOXYLASE 3 (SAMDC3)	S-adenosylmethionine decarboxylase family member.
2.88052	0.705682	AT4G04610		APS REDUCTASE 1 (APR1); (ATAPR1);PAPS REDUCTASE HOMOLOG 19 (PRH19); (APR)	Encodes a protein disulfide isomerase-like (PDIL) protein, a member of a multigene family within the thioredoxin (TRX) superfamily. This protein also belongs to the adenosine 5'-phosphosulfate reductase-like (APRL) group. The mRNA is cell-to-cell mobile.
2.875	4.875	AT1G06750			P-loop containing nucleoside triphosphate hydrolases superfamily protein;(source:Araport11)
2.875	2.20833	AT1G14490		AT-HOOK MOTIF NUCLEAR LOCALIZED PROTEIN 28 (AHL28)	Putative AT-hook DNA-binding family protein;(source:Araport11)
2.87302	3.52381	AT1G47400		IRONMAN 1 (IMA1);FE-UPTAKE-INDUCING PEPTIDE3 (FEP3)	Involved in regulation of iron deficiency response genes. Overexpression results in hyperaccumulation of Fe and Mn.
2.86957	2.52174	AT3G58770			hypothetical protein;(source:Araport11)
2.86667	2	AT3G01840		LYSM-CONTAINING RECEPTOR-LIKE KINASE 2 (LYK2)	Encodes a putative LysM-containing receptor-like kinase. Induction of chitin-responsive genes by chitin treatment is not blocked in the mutant. Based on protein sequence alignment analysis, it was determined to be a pseudo kinase since lack of the ATP-binding P-loop in the kinase domain.
2.86667	1.53333	AT5G66940	DOF5.8	(ATDOF5.8)	Encodes a nuclear localized DOF-domain binding transcription factor.
2.86364	2.13636	AT3G22840		(ELIP);EARLY LIGHT-INDUCABLE PROTEIN (ELIP1)	Encodes an early light-inducible protein.
2.86364	1.45455	AT5G15940			NAD(P)-binding Rossmann-fold superfamily protein;(source:Araport11)
2.86292	0.748023	AT1G15125			S-adenosyl-L-methionine-dependent methyltransferases superfamily protein;(source:Araport11)
2.86154	2.27692	AT1G77855			Phosphatidylinositol 4-phosphate 5-kinase (PIP5K) enzyme family member.
2.86111	1.05556	AT5G59670			Leucine-rich repeat protein kinase family protein;(source:Araport11)
2.86	2.54	AT4G29880		PLANT INTRACELLULAR RAS GROUP-RELATED LRR 7 (PIRL7)	Encodes PIRL7, a member of the Plant Intracellular Ras-group-related LRRs (Leucine rich repeat proteins). PIRLs are a distinct, plant-specific class of intracellular LRRs that likely mediate protein interactions, possibly in the context of signal transduction.
2.84783	1.91304	AT5G48690			ubiquitin-associated (UBA)/TS-N domain protein;(source:Araport11)
2.84579	2.5771	AT4G01600			GRAM domain family protein;(source:Araport11)
2.83871	0.437788	AT1G66090			Disease resistance protein (TIR-NBS class);(source:Araport11)
2.83333	2.08333	AT2G21900		WRKY DNA-BINDING PROTEIN 59 (WRKY59); (AtWRKY59)	member of WRKY Transcription Factor; Group II-c
2.83333	2.75	AT1G79915			Putative methyltransferase family protein;(source:Araport11)
2.83333	1.33333	AT3G50330		HECATE 2 (HEC2)	Encodes a bHLH transcription factor that is involved in transmitting tract and stigma development.
2.83333	2.1	AT2G03925			Natural antisense transcript overlaps with AT2G01290;(source:Araport11)
2.83146	2.53933	AT3G48540			Cytidine/deoxycytidylate deaminase family protein;(source:Araport11)
2.82667	2.49333	AT2G24970			spindle/kinetochore-associated protein;(source:Araport11)
2.825	0.908333	AT1G74870			RING/U-box superfamily protein;(source:Araport11)
2.8248	1.18898	AT4G39030		ENHANCED DISEASE SUSCEPTIBILITY 5 (EDS5);SUSCEPTIBLE TO CORONATINE-DEFICIENT PST DC3000 3 (SCORD3);SALICYLIC ACID INDUCTION DEFICIENT 1 (SID1)	Encodes an orphan multidrug and toxin extrusion transporter. Essential component of salicylic acid-dependent signaling for disease resistance. Member of the MATE-transporter family. Expression induced by salicylic acid. Mutants are salicylic acid-deficient.
2.82278	0.974684	AT1G58170			Disease resistance-responsive (dirigent-like protein) family protein;(source:Araport11)
2.82068	2.75929	AT4G33260	CDC20.2	(AtCDC20.2);CELL DIVISION CYCLE 20.2 (CDC20.2)	Encodes a CDC20 protein that interacts with APC subunits, components of the mitochondrial checkpoint complex and mitotic cyclin substrates and is indispensable for normal plant development and fertility.
2.81928	2.48193	AT4G16807			ATP-dependent caseinolytic protease/crotonase family protein;(source:Araport11)
2.81818	0.681818	AT4G11400			ARID/BRIGHT DNA-binding , ELM2 domain and myb-like DNA-binding domain-containing protein;(source:Araport11)
2.81818	0.454545	AT4G03925			None;(source:Araport11)
2.81481	1.03704	AT2G40750		WRKY DNA-BINDING PROTEIN 54 (WRKY54);WRKY DNA-BINDING PROTEIN 54 (ATWRKY54)	member of WRKY Transcription Factor; Group III
2.81481	2.38889	AT3G62760	GSTF13	(ATGSTF13)	Encodes glutathione transferase belonging to the phi class of GSTs. Naming convention according to Wagner et al. (2002).
2.81343	2.68657	AT5G01910			myelin transcription factor;(source:Araport11)
2.8125	1.9375	AT1G09880			Rhamnogalacturonate lyase family protein;(source:Araport11)
2.8	1.54286	AT5G05490	SYN1	SYNAPTIC 1 (SYN1); (REC8); (ATREC8)	Encodes a RAD21-like gene essential for meiosis. Encodes a 627 a.a. protein that is slightly longer in the N-terminus than SYN1 BP5.
2.8	3.17143	AT5G49152			Natural antisense transcript overlaps with AT5G49150;(source:Araport11)
2.79032	2.45161	AT1G68430			hypothetical protein;(source:Araport11)
2.78947	2.26316	AT2G24800			Peroxidase superfamily protein;(source:Araport11)
2.78289	1.30921	AT5G59240			Ribosomal protein S8e family protein;(source:Araport11)
2.77778	4.77778	AT1G63630			Tetratricopeptide repeat (TPR)-like superfamily protein;(source:Araport11)
2.77778	1.88889	AT1G04563			None;(source:Araport11)
2.7769	1.75321	AT3G19710	BCAT4	BRANCHED-CHAIN AMINOTRANSFERASE4 (BCAT4)	Belongs to the branched-chain amino acid aminotransferase gene family. Encodes a methionine-oxo-acid transaminase. Involved in the methionine chain elongation pathway that leads to the ultimate biosynthesis of methionine-derived glucosinolates.
2.76517	1.36148	AT5G13930		CHALCONE SYNTHASE (CHS); (ATCHS);TRANSPARENT TESTA 4 (TT4)	Encodes chalcone synthase (CHS), a key enzyme involved in the biosynthesis of flavonoids. Required for the accumulation of purple anthocyanins in leaves and stems. Also involved in the regulation of auxin transport and the modulation of root gravitropism. The mRNA is cell-to-cell mobile.
2.76515	1.94697	AT1G35830			VQ motif-containing protein;(source:Araport11)
2.76471	1.94118	AT3G05365			hypothetical protein;(source:Araport11)
2.7619	1.85714	AT1G67610			pseudogene of F-box protein (DUF295);(source:Araport11)
2.7619	1.7619	AT5G08495			None;(source:Araport11)
2.76	5.6	AT1G24470		(ATKCR2);BETA-KETOACYL REDUCTASE 2 (KCR2)	Encodes one of the two Arabidopsis homologues to YBR159w encoding a S. cerevisiae beta-ketoacyl reductase (KCR), which catalyzes the first reduction during VLCFA (very long chain fatty acids, >18 carbon) elongation: KCR1 (At1g67730), KCR2 (At1g24470). Complementation of the yeast ybr159Delta mutant demonstrated that the two KCR proteins are divergent and that only AtKCR1 can restore heterologous …
2.75767	3.15482	AT4G22475			transmembrane protein;(source:Araport11)
2.75699	1.02478	AT4G24350			Phosphorylase superfamily protein;(source:Araport11)
2.75595	2.4881	AT4G15680	GRXS4	(ROXY13); (GRXS4)	Encodes a member of the CC-type glutaredoxin (ROXY) family. Operates downstream of cytokinins in a signal transduction pathway that negatively regulates plant primary root growth in response to nitrate.
2.75325	1.51948	AT3G14225		GDSL-MOTIF LIPASE 4 (GLIP4)	Contains lipase signature motif and GDSL domain.
2.75	3.125	AT4G29370			Galactose oxidase/kelch repeat superfamily protein;(source:Araport11)
2.75	1.41071	AT4G29610			Cytidine/deoxycytidylate deaminase family protein;(source:Araport11)
2.75	1.44231	AT1G53610			transmembrane protein;(source:Araport11)
2.75	2.5625	AT1G75300			encodes a protein whose sequence is similar to an isoflavone reductase
2.75	3.125	AT3G02435			None;(source:Araport11)
2.75	3.05	AT4G04225			Natural antisense transcript overlaps with AT4G02620;(source:Araport11)
2.74947	0.968153	AT4G14365		XB3 ORTHOLOG 4 IN ARABIDOPSIS THALIANA (XBAT34)	hypothetical protein;(source:Araport11)
2.74448	1.56151	AT3G22810		FORKED-LIKE2 (FL2)	FORKED-LIKE family member, part of Group 1 (FKD1, FL1-FL3; Group 2 consists of FL4 and FL8 and Group 3 consists of FL5- FL7). May coordinate leaf size with vein density, where Group 1 members and Group 3 members have opposing functions.
2.74286	1.71429	AT1G09421			Natural antisense transcript overlaps with AT1G09420;(source:Araport11)
2.73913	2.91304	AT5G64530	XND1,NAC104	XYLEM NAC DOMAIN 1 (XND1);ARABIDOPSIS NAC DOMAIN CONTAINING PROTEIN 104 (ANAC104)	xylem NAC domain 1;(source:Araport11)
2.73913	2.73913	AT2G34220		MATERNAL EFFECT EMBRYO ARREST 20 (MEE20)	ubiquitin carboxyl-terminal hydrolase-like protein, putative (DUF627 and DUF629);(source:Araport11)
2.73063	3.2214	AT5G53210	SPCH	SPEECHLESS	basic helix-loop-helix (bHLH) transcription factor that is necessary and sufficient for the asymmetric divisions that establish the stomatal lineage
2.73006	3.41309	AT2G32179			Natural antisense transcript overlaps with AT2G32180;(source:Araport11)
2.72917	2.66667	AT5G40960			transmembrane protein, putative (DUF 3339);(source:Araport11)
2.72897	3.94393	AT1G34245	EPF2	EPIDERMAL PATTERNING FACTOR 2 (EPF2)	Encodes a secretory peptide EPF2 expressed in proliferating cells of the stomatal lineage, known as meristemoids, and in guard mother cells, the progenitors of stomata. Controls asymmetric cell divisions during stomatal development. EPF2 is related to EPF1, also involved in stomatal development. Its transcript levels change after inducing MUTE expression in a mute background. EPF2 binds to the ER…
2.72727	1.95455	AT1G52430			Ubiquitin carboxyl-terminal hydrolase-related protein;(source:Araport11)
2.72727	3	AT3G15170	CUC1,NAC054	CUP-SHAPED COTYLEDON1 (CUC1); (ATNAC1);ARABIDOPSIS NAC DOMAIN CONTAINING PROTEIN 54 (ANAC054)	Encodes a transcription factor involved in shoot apical meristem formation and cotyledon separation. Functions redundantly with CUC2 and CUC3. The cuc1 cuc2 double mutant phenotype is first detectable at the heart stage, as embryos lacking two distinct bulges of cotyledonary primordia.In post embryonic development it plays a role in axillary meristem formation, boundary separation, gynoecium and …
2.72727	2.63636	AT4G31620		REPRODUCTIVE MERISTEM 36 (REM36)	Transcriptional Factor B3 family protein
2.7265	1.66239	AT1G24090	RNH1C	(RNH1C)	RNase H family protein;(source:Araport11)
2.72603	2.24658	AT2G20480			hypothetical protein;(source:Araport11)
2.72549	0.843137	AT1G02580		MEDEA (MEA);SET DOMAIN-CONTAINING PROTEIN 5 (SDG5);FERTILIZATION INDEPENDENT SEED 1 (FIS1);EMBRYO DEFECTIVE 173 (EMB173)	Encodes the imprinted gene MEA that belongs to Polycomb Repressive Complex 2 (PRC2) and has a SET domain for methyltransferase activity and is involved in the stable transcriptional silencing of target genes. It negatively regulates seed development in the absence of fertilization. Mutations in this locus result in embryo lethality. MEA is imprinted in the endosperm. The maternal allele is expres…
2.72308	2.10769	AT1G22275	ZYP1b	(ZYP1); (ZYP1b)	One of two nearly identical proteins (ZYP1a) identified by similarity to transverse filament (TF) proteins. These proteins are involved in chromosome synapsis during meiosis I and localize to the synaptonemal complex (SC). Single mutants have reduced fertility and double mutants (induced by RNAi) have severely reduced fertility.
2.72	0.84	AT4G10580			transposable_element_gene;(source:Araport11);gypsy-like retrotransposon family, has a 1.1e-306 P-value blast match to GB:AAD27547 polyprotein (Gypsy_Ty3-element) (Oryza sativa subsp. indica);(source:TAIR10)
2.71845	3.32039	AT1G45191	BGLU1	BETA GLUCOSIDASE 1 (BGLU1)	beta-glucosidase related protein, similar to beta-glucosidase GI:3820531 from (Pinus contorta); contains Pfam profile: PF00232 Glycosyl hydrolase family 1
2.71429	2.67347	AT5G02220		SIAMESE-RELATED 4 (SMR4)	cyclin-dependent kinase inhibitor;(source:Araport11)
2.71429	1.21429	AT1G06087			None;(source:Araport11)
2.71429	1.5	AT1G04150		MULTIPLE C2 DOMAIN AND TRANSMEMBRANE REGION PROTEIN 10 (MCTP10)	C2 calcium/lipid-binding plant phosphoribosyltransferase family protein;(source:Araport11)
2.70732	2.73171	AT1G07743			Natural antisense transcript overlaps with AT1G51402;(source:Araport11)
2.70526	2.21053	AT1G67780		DDT-RELATED PROTEIN3 (DDR3)	Zinc-finger domain of monoamine-oxidase A repressor R1 protein;(source:Araport11)
2.70312	3.3125	AT5G60880	BASL	BREAKING OF ASYMMETRY IN THE STOMATAL LINEAGE (BASL)	Encodes BASL (BREAKING OF ASYMMETRY IN THE STOMATAL LINEAGE), a regulator of asymmetric divisions. In asymmetrically dividing stomatal-lineage cells, BASL accumulates in a polarized crescent at the cell periphery before division, and then localizes differentially to the nucleus and a peripheral crescent in self-renewing cells and their sisters after division. Its transcript levels change after in…
2.7027	2.00901	AT3G15720			Pectin lyase-like superfamily protein;(source:Araport11)
2.70199	2.41501	AT3G30214			pseudogene of transmembrane protein;(source:Araport11)
2.69697	1.84848	AT2G41450			N-acetyltransferase;(source:Araport11)
2.69283	2.17406	AT3G57730	ZRK3	(ZRK3)	Protein kinase superfamily protein;(source:Araport11)
2.69238	1.7099	AT3G02020		ASPARTATE KINASE 3 (AK3)	encodes a monofunctional aspartate kinase
2.69091	1.23636	AT5G64905		ELICITOR PEPTIDE 3 PRECURSOR (PROPEP3)	elicitor peptide 3 precursor;(source:Araport11)
2.69036	1.74619	AT2G34010		TCP INTERACTOR CONTAINING EAR MOTIF PROTEIN 4 (TIE4)	verprolin;(source:Araport11)
2.68396	2.08962	AT1G31760	SWIB5	SWI/SNF PROTEIN COMPLEX B5 (SWIB5)	SWIB/MDM2 domain superfamily protein;(source:Araport11)
2.68	1.28	AT5G08820			Natural antisense transcript overlaps with AT5G58130;(source:Araport11)
2.67692	2.93077	AT1G78430		ROP INTERACTIVE PARTNER 4 (RIP4);ROP INTERACTIVE PARTNER 2 (RIP2);INTERACTOR OF CONSTITUTIVELY ACTIVE ROP4 (ICR4)	Encodes RIP2 (ROP interactive partner 2), a putative Rho protein effector, interacting specifically with the active form of ROPs (Rho proteins of plants).
2.67036	1.77978	AT2G43100	IPMI2,SSU2	ISOPROPYLMALATE ISOMERASE 2 (IPMI2);ISOPROPYLMALATE ISOMERASE SMALL SUB-UNIT 2 (IPMI SSU2); (ATLEUD1)	Small subunit, which together with IPMI SSU2, IPMI SSU3 and IPMI LSU1, is a member of heterodimeric isopropylmalate isomerase (IPMI). Together with IPMI SSU3 participates in the Met chain elongation pathway.
2.66954	1.26437	AT3G07000			Cysteine/Histidine-rich C1 domain family protein;(source:Araport11)
2.66854	1.6236	AT3G61950	MYC67	MYC-TYPE TRANSCRIPTION FACTOR 67 (MYC67)	MYC-type transcription factor which interacts with ICE1 and negatively regulates cold-responsive genes and cold tolerance.
2.66667	2.7	AT1G04330	PH2	(PH2)	A proline/serine rich protein of unknown function. It interacts with defense related MAP kinase MPK6 and others. May be involved in signaling during defense or stress response.
2.66667	1.53333	AT1G07313			None;(source:Araport11)
2.66667	1.71111	AT5G54400			S-adenosyl-L-methionine-dependent methyltransferases superfamily protein;(source:Araport11)
2.66667	2.625	AT1G55010		PLANT DEFENSIN 1.5 (PDF1.5)	Predicted to encode a PR (pathogenesis-related) protein. Belongs to the plant defensin (PDF) family with the following members: At1g75830/PDF1.1, At5g44420/PDF1.2a, At2g26020/PDF1.2b, At5g44430/PDF1.2c, At2g26010/PDF1.3, At1g19610/PDF1.4, At1g55010/PDF1.5, At2g02120/PDF2.1, At2g02100/PDF2.2, At2g02130/PDF2.3, At1g61070/PDF2.4, At5g63660/PDF2.5, At2g02140/PDF2.6, At5g38330/PDF3.1 and At4g30070/PDF…
2.65976	1.83432	AT1G69280			hypothetical protein;(source:Araport11)
2.65896	1.6474	AT5G22390			FANTASTIC four-like protein (DUF3049);(source:Araport11)
2.6546	1.35294	AT1G30110		NUDIX HYDROLASE HOMOLOG 25 (NUDX25);NUDIX HYDROLASE HOMOLOG 25 (ATNUDX25)	Encodes a ppGpp pyrophosphohydrolase.
2.65458	2.77347	AT3G47350		HYDROXYSTEROID DEHYDROGENASE 2 (AtHSD2);HYDROXYSTEROID DEHYDROGENASE 2 (HSD2)	Encodes a putative hydroxysteroid dehydrogenase (HSD). Genes that encode HSD include: At5g50600 and At5g50700 (HSD1), At3g47350(HSD2), At3g47360(HSD3), At5g50590 and At5g50690(HSD4), At5g50770(HSD6) (Plant Cell Physiology 50:1463). Two copies of HSD1 and HSD4 exist due to a gene duplication event. In Plant Physiology 145:87, At5g50690 is HSD7, At4g10020 is HSD5.
2.65395	1.68289	AT4G34750		SMALL AUXIN UPREGULATED RNA 49 (SAUR49)	SAUR-like auxin-responsive protein family;(source:Araport11)
2.65306	2.22449	AT2G08600			novel transcribed region; detected in root, carpel, root apical meristem, receptacle, leaf, dark-grown seedling, light-grown seedling, flower, pollen, aerial, shoot apical meristem;(source:Araport11)
2.65099	1.12784	AT3G03780		METHIONINE SYNTHASE 2 (MS2);METHIONINE SYNTHASE 2 (ATMS2)	Encodes a cytosolic methionine synthase, involved in methionine regeneration via the activated methyl cycle (or SAM cycle)
2.65089	1.34542	AT1G14210			Ribonuclease T2 family protein;(source:Araport11)
2.64935	3.36883	AT3G05600		EPOXIDE HYDROLASE 1 (ATEH1)	Encodes a cytosolic epoxide hydrolase capable of acting on 9,10-epoxystearic acid and on 12,13- epoxyoctadec-9-enoic acid that is involved in the synthesis of poly-hydroxylated cutin monomers.
2.64238	2.25166	AT1G63100	SCL28	SCARECROW-LIKE 28 (SCL28)	Transcription factor belonging to the GRAS family which controls the mitotic cell cycle and division plane orientation.
2.6412	1.13503	AT3G14310		PECTIN METHYLESTERASE 3 (ATPME3);OVERLY ZINC SENSITIVE 2 (OZS2);PECTIN METHYLESTERASE 3 (PME3)	encodes a pectin methylesterase, targeted by a cellulose binding protein (CBP) from the parasitic nematode Heterodera schachtii during parasitism.
2.63636	2.02273	AT2G03110			putative RNA-binding protein;(source:Araport11)
2.63611	0.414384	AT1G24280		GLUCOSE-6-PHOSPHATE DEHYDROGENASE 3 (G6PD3)	Encodes a plastidic glucose-6-phosphate dehydrogenase that is sensitive to reduction by DTT and whose mRNA is most highly expressed in root.
2.63448	2.08276	AT5G24330		ARABIDOPSIS TRITHORAX-RELATED PROTEIN 6 (ATXR6);SET DOMAIN PROTEIN 34 (SDG34)	Encodes a SET-domain protein, a H3K27 monomethyltransferases required for chromatin structure and gene silencing. Regulates heterochromatic DNA replication. Contains a PCNA-binding domain. ATXR6 accumulates preferentially during the late G1 or S phase, suggesting that it plays a role in cell-cycle regulation or progression.
2.63211	1.97993	AT2G37510			RNA-binding (RRM/RBD/RNP motifs) family protein;(source:Araport11)
2.63187	1.47253	AT1G15870			Mitochondrial glycoprotein family protein;(source:Araport11)
2.63158	2	AT2G08755			None;(source:Araport11)
2.6273	1.93224	AT5G23010	MAM1	GLUCOSINOLATE METABOLISM 1 (GSM1);METHYLTHIOALKYLMALATE SYNTHASE 1 (MAM1);2-ISOPROPYLMALATE SYNTHASE 3 (IMS3)	Encodes a methylthioalkylmalate synthase, catalyzes the condensation reactions of the first two rounds of methionine chain elongation in the biosynthesis of methionine-derived glucosinolates. The mRNA is cell-to-cell mobile.
2.62162	1.78378	AT3G09080			Transducin/WD40 repeat-like superfamily protein;(source:Araport11)
2.62111	2.96752	AT2G25060	ENODL14	(AtENODL14);EARLY NODULIN-LIKE PROTEIN 14 (ENODL14)	early nodulin-like protein 14;(source:Araport11)
2.61702	1.31915	AT5G25230			Ribosomal protein S5/Elongation factor G/III/V family protein;(source:Araport11)
2.61357	2.49558	AT1G54660			Possibly not a pseudogene based on evidence for transcription (RNA-seq) and translation (Ribo-seq) described in PMID:27791167
2.6129	0.548387	AT2G32200		CYSTEINE-RICH TRANSMEMBRANE MODULE 5 (ATHCYSTM5)	cysteine-rich/transmembrane domain A-like protein;(source:Araport11)
2.6129	2.67742	AT1G67760			TCP-1/cpn60 chaperonin family protein;(source:Araport11)
2.61272	1.35354	AT4G39950	CYP79B2	CYTOCHROME P450, FAMILY 79, SUBFAMILY B, POLYPEPTIDE 2 (CYP79B2)	Belongs to cytochrome P450 and is involved in tryptophan metabolism. Converts Trp to indo-3-acetaldoxime (IAOx), a precursor to IAA and indole glucosinolates. The mRNA is cell-to-cell mobile.
2.61224	1.93878	AT5G26790			transmembrane protein;(source:Araport11)
2.61111	1.27778	AT5G57520	ZFP2	ZINC FINGER PROTEIN 2 (ATZFP2);ZINC FINGER PROTEIN 2 (ZFP2)	Encodes a zinc finger protein containing only a single zinc finger.
2.60899	2.07266	AT3G12965		SHORT OPEN READING FRAME 23 (SORF23)	Has been identified as a translated small open reading frame by ribosome profiling.
2.6087	2.0087	AT2G38160		BASIC PROLINE-RICH PROTEIN4 (BPP4)	hypothetical protein;(source:Araport11)
2.6087	0.869565	AT1G50750			aminotransferase-like, mobile domain protein;(source:Araport11)
2.60526	2.26316	AT5G23780		DOMAIN OF UNKNOWN FUNCTION 724 9 (ATDUF9);DOMAIN OF UNKNOWN FUNCTION 724 9 (DUF9)	Member of the plant-specific DUF724 protein family. Arabidopsis has 10 DUF724 proteins. Loss of function mutant has a WT phenotype
2.59909	2.39701	AT3G62810	LYRM7	(MZM1); (LYRM7)	complex 1 family protein / LVR family protein;(source:Araport11)
2.59449	2.39764	AT1G24575			DEAD-box ATP-dependent RNA helicase-like protein;(source:Araport11)
2.59322	2.57627	AT5G09570	AT12CYS-2	(AT12CYS-2)	Twin CX9C domain protein. Induced by low phosphate or iron, drought and heat stress. Loss of both At12cys-1 and At12cys-2 lead to enhanced tolerance to drought and light stress and increased anti-oxidant capacity.
2.59091	1.59091	AT3G15270		SQUAMOSA PROMOTER BINDING PROTEIN-LIKE 5 (SPL5)	Encodes a member of the SPL (squamosa-promoter binding protein-like)gene family, a novel gene family encoding DNA binding proteins and putative transcription factors. Contains the SBP-box, which encodes the SBP-domain, required and sufficient for interaction with DNA. It is involved in regulation of flowering and vegetative phase change. Its temporal expression is regulated by the microRNA miR156…
2.58394	2.0146	AT2G19530			transmembrane protein;(source:Araport11)
2.58333	2.5	AT5G28622			transposable_element_gene;(source:Araport11);non-LTR retrotransposon family (LINE), has a 1.1e-21 P-value blast match to GB:NP_038602 L1 repeat, Tf subfamily, member 18 (LINE-element) (Mus musculus);(source:TAIR10)
2.57768	1.98198	AT1G54010		GDSL-LIKE LIPASE 23 (GLL23)	GDSL-motif esterase/acyltransferase/lipase. Enzyme group with broad substrate specificity that may catalyze acyltransfer or hydrolase reactions with lipid and non-lipid substrates.
2.57692	1.76923	AT1G09253			Natural antisense transcript overlaps with AT1G71480;(source:Araport11)
2.57343	1.83217	AT1G13800		EMBRYONIC FACTOR 19 (FAC19)	Encodes a PPR (pentatricopeptide repeat motif) protein that is essential for the initiation of zygotic embryogenesis.
2.56557	2.30328	AT5G07660		STRUCTURAL MAINTENANCE OF CHROMOSOMES 6A (SMC6A)	Encodes SMC6A (STRUCTURAL MAINTENANCE OF CHROMOSOMES 6A), a component of the SMC5/6 complex. SMC5/6 complex promotes sister chromatid alignment and homologous recombination after DNA damage.
2.56322	2.28736	AT3G47540			Chitinase family protein;(source:Araport11)
2.5625	1.0625	AT4G12410		SMALL AUXIN UPREGULATED RNA 35 (SAUR35)	SAUR-like auxin-responsive protein family;(source:Araport11)
2.5625	2.375	AT3G08275			None;(source:Araport11)
2.56061	1.35354	AT4G13195	CLE44	CLAVATA3/ESR-RELATED 44 (CLE44)	Belongs to a large gene family, called CLE for CLAVATA3/ESR-related, encoding small peptides with conserved carboxyl termini. The C-terminal 12 amino acid sequence of CLE44 is identical to that of a dodeca peptide (TDIF, tracheary element differentiation inhibitory factor) isolated from Arabidopsis and functions as a suppressor of plant stem cell differentiation. TDIF sequence is also identical t…
2.55683	1.16482	AT2G30870	GSTF10	ARABIDOPSIS THALIANA GLUTATHIONE S-TRANSFERASE PHI 10 (ATGSTF10);GLUTATHIONE S-TRANSFERASE PHI 10 (GSTF10); (ATGSTF4);EARLY DEHYDRATION-INDUCED 13 (ERD13)	early dehydration-induced gene ERD13 homologous to tobacco and maize glutathione S-transferases. Encodes glutathione transferase belonging to the phi class of GSTs. Naming convention according to Wagner et al. (2002)
2.5561	2.34292	AT3G20670	HTA13	HISTONE H2A 13 (HTA13)	Encodes HTA13, a histone H2A protein.
2.55556	0.466667	AT1G33760		ETHYLENE RESPONSE FACTOR022 (ERF022)	encodes a member of the DREB subfamily A-4 of ERF/AP2 transcription factor family. The protein contains one AP2 domain. There are 17 members in this subfamily including TINY.
2.55556	2.22222	AT5G28280			pseudogene of sterol desaturase domain-containing protein;(source:Araport11)
2.55556	3.26667	AT5G45990			crooked neck protein, putative / cell cycle protein;(source:Araport11)
2.55556	1.66667	AT1G05937			None;(source:Araport11)
2.54747	1.5228	AT4G31700		RIBOSOMAL PROTEIN S6 (RPS6); (ATRPS6); (RPS6A)	Encodes a putative ribosomal protein S6 (rps6a). RPS6A and RPS6B are fully redundant and essential during gametogenesis.
2.54545	1.04545	AT1G15580		INDOLE-3-ACETIC ACID INDUCIBLE 5 (IAA5);AUXIN-INDUCIBLE 2-27 (AUX2-27); (ATAUX2-27)	auxin induced protein
2.54545	2.48182	AT3G15650			alpha/beta-Hydrolases superfamily protein;(source:Araport11)
2.54497	1.27513	AT2G33847			hypothetical protein;(source:Araport11)
2.54391	2.43059	AT4G26660			kinesin-like protein;(source:Araport11)
2.54286	2.71429	AT3G13210			crooked neck protein, putative / cell cycle protein;(source:Araport11)
2.54167	1.33333	AT4G16233			GDSL-like lipase/acylhydrolase superfamily protein;(source:Araport11)
2.53947	4.5	AT2G39510		USUALLY MULTIPLE ACIDS MOVE IN AND OUT TRANSPORTERS 14 (UMAMIT14)	Encodes a plasma membrane-localized amino acid transporter likely involved in amino acid export in the developing seed.
2.53782	3.57983	AT1G10640			Pectin lyase-like superfamily protein;(source:Araport11)
2.52978	3.25705	AT4G02800	MADA1	(MADA1)	GRIP/coiled-coil protein;(source:Araport11)
2.5283	1.83019	AT3G57200			glycosyltransferase-like protein;(source:Araport11)
2.52778	2.13889	AT4G17380	MSH4	MUTS-LIKE PROTEIN 4 (MSH4);ARABIDOPSIS MUTS HOMOLOG 4 (ATMSH4);MUTS HOMOLOG 4 (MSH4)	Encodes the Arabidopsis homolog of MSH4, a meiosis-specific member of the MutS-homolog family of genes. It is expressed only in floral tissues and only during early meiotic prophase I, preceding the synapsis of homologous chromosomes. It is involved in the early steps of recombination.
2.52174	3.30435	AT1G08273			Natural antisense transcript overlaps with AT1G59850;(source:Araport11)
2.52113	1.85915	AT4G18195		ARABIDOPSIS THALIANA PURINE PERMEASE 8 (ATPUP8);PURINE PERMEASE 8 (PUP8)	Member of a family of proteins related to PUP1, a purine transporter. May be involved in the transport of purine and purine derivatives such as cytokinins, across the plasma membrane.
2.51721	2.90589	AT5G47500		PECTIN METHYLESTERASE 5 (PME5)	predicted to encode a pectin methylesterase
2.51667	0.383333	AT5G36925		ARACIN1 (ARACIN1)	hypothetical protein;(source:Araport11)
2.51515	0.963636	AT4G15975		ARABIDOPSIS TOXICOS EN LEVADURA 17 (ATL17)	RING/U-box superfamily protein;(source:Araport11)
2.51282	2.62393	AT1G04760		VESICLE-ASSOCIATED MEMBRANE PROTEIN 726 (ATVAMP726);VESICLE-ASSOCIATED MEMBRANE PROTEIN 726 (VAMP726)	member of Synaptobrevin -like protein family
2.50962	1.625	AT3G56970		OBP3-RESPONSIVE GENE 3 (ORG2); (BHLH038);BASIC HELIX-LOOP-HELIX 38 (BHLH38)	Encodes a member of the basic helix-loop-helix transcription factor family protein.
2.50895	0.936061	AT2G47800		MULTIDRUG RESISTANCE-ASSOCIATED PROTEIN 4 (ATMRP4);ATP-BINDING CASSETTE C4 (ABCC4);MULTIDRUG RESISTANCE-ASSOCIATED PROTEIN 4 (MRP4); (EST3)	Encodes a plasma membrane localized ATPase transporter involved in multidrug transport. The expression of this gene is upregulated by herbicide safeners such as benoxacor, fluxofenim and fenclorim. The mRNA is cell-to-cell mobile.
2.50877	1.3208	AT3G49620		DARK INDUCIBLE 11 (DIN11)	encodes a protein similar to 2-oxoacid-dependent dioxygenase. Expression is induced after 24 hours of dark treatment, in senescing leaves and treatment with exogenous photosynthesis inhibitor. Induction of gene expression was suppressed in excised leaves supplied with sugar. The authors suggest that the gene's expression pattern is responding to the level of sugar in the cell.
2.50794	1.98282	AT2G22330	CYP79B3	CYTOCHROME P450, FAMILY 79, SUBFAMILY B, POLYPEPTIDE 3 (CYP79B3)	Encodes a cytochrome P450. Involved in tryptophan metabolism. Converts Trp to indole-3-acetaldoxime (IAOx), a precursor to IAA and indole glucosinolates. The mRNA is cell-to-cell mobile.
2.50761	2.40102	AT2G33560		BUB1-RELATED (BUB1: BUDDING UNINHIBITED BY BENZYMIDAZOL 1) (BUBR1)	Encodes BUBR1. May have the spindle assembly checkpoint protein functions conserved from yeast to humans.
2.5	0.545455	AT1G07937			None;(source:Araport11)
2.5	1.33333	AT4G25631	U60.2F	(U60.2F)	Encodes a novel C/D box snoRNA (U60.2f) encoded within the 5th intron of FIB2. Gb: AF228365
2.5	1.16667	AT5G44990			Glutathione S-transferase family protein;(source:Araport11)
2.5	1.92857	AT5G65320			basic helix-loop-helix (bHLH) DNA-binding superfamily protein;(source:Araport11)

## Sheet: S6. ZFP3-induced, long E
Table S6. Genes with increased expression (at least 2.5x) in ZFP3 overexpressing plants continuously treated with estradiol (Long treatment).
Fold change/Short	Fold change/Long	AGI	Protein	Gene Symbols	Gene Model Description
857.731	141.703	AT5G25160	ZFP3	ZINC FINGER PROTEIN 3 (ZFP3)	Encodes a zinc finger protein containing only a single zinc finger.
96.0476	126.476	AT2G13547			hypothetical protein;(source:Araport11)
9.05263	10.6316	AT1G48100	PGX3	POLYGALACTURONASE INVOLVED IN EXPANSION3 (PGX3)	Pectin lyase-like superfamily protein;(source:Araport11)
2.27778	10.3889	AT1G34047			Encodes a defensin-like (DEFL) family protein.
1.5	9.25	AT1G05843			None;(source:Araport11)
3.73913	8.26087	AT2G14560	LURP1	LATE UPREGULATED IN RESPONSE TO HYALOPERONOSPORA PARASITICA (LURP1)	Encodes LURP1, a member of the LURP cluster (late upregulated in response to Hyaloperonospora parasitica) which exhibits a pronounced upregulation after recognition of the pathogenic oomycte H. parasitica. LURP1 is required for full basal defense to H. parasitica and resistance to this pathogen mediated by the R-proteins RPP4 and RPP5. The mRNA is cell-to-cell mobile.
7.75	8.25	AT1G67626			transposable_element_gene;(source:Araport11);pseudogene, hypothetical protein;(source:TAIR10)
7.70588	8.11765	AT4G27590	HMP37	HEAVY METAL ASSOCIATED PROTEIN 37 (ATHMP37)	Heavy metal transport/detoxification superfamily protein;(source:Araport11)
8.8	8	AT4G06080			None;(source:Araport11)
2.53846	7.76923	AT4G04293			transposable_element_gene;(source:Araport11);pseudogene, similar to P0703B11.15, blastp match of 38%25 identity and 2.2e-25 P-value to GP|18844826|dbj|BAB85296.1||AP003302 P0703B11.15 {Oryza sativa (japonica cultivar-group)};(source:TAIR10)
11.625	7.75	AT4G03275			novel transcribed region;(source:Araport11)
4.52941	7.58824	AT1G04295			Natural antisense transcript overlaps with AT1G04290;(source:Araport11)
5.03229	7.51184	AT3G09390	MT2A	METALLOTHIONEIN 2A (MT2A);ARABIDOPSIS THALIANA METALLOTHIONEIN-1 (ATMT-1);ARABIDOPSIS THALIANA METALLOTHIONEIN-K (ATMT-K)	metallothionein, binds to and detoxifies excess copper and other metals, limiting oxidative damage
2	7.5	AT5G16486			RNA-directed DNA polymerase (reverse transcriptase)-related family protein;(source:Araport11)
4.54545	7.36364	AT1G52130			Mannose-binding lectin superfamily protein;(source:Araport11)
8	7.28571	AT2G18180			Sec14p-like phosphatidylinositol transfer family protein;(source:Araport11)
4.66667	7.2	AT4G26255			other_RNA;(source:Araport11)
4.66667	7	AT2G01905	CYCJ18	CYCLIN J18 (CYCJ18)	cyclin J18 (cycJ18)
3.11765	6.88235	AT1G26890			FBD, F-box and Leucine Rich Repeat domains containing protein;(source:Araport11)
10	6.875	AT2G02620			Cysteine/Histidine-rich C1 domain family protein;(source:Araport11)
5.625	6.875	AT5G33395			transposable_element_gene;(source:Araport11);CACTA-like transposase family (Ptta/En/Spm), has a 7.1e-27 P-value blast match to At5g59620.1/14-257 CACTA-like transposase family (Ptta/En/Spm) (CACTA-element) (Arabidopsis thaliana);(source:TAIR10)
3.5	6.75	AT5G09735			None;(source:Araport11)
3.91667	6.66667	AT1G47510	5PTASE11	INOSITOL POLYPHOSPHATE 5-PHOSPHATASE 11 (5PTASE11);ARABIDOPSIS THALIANA INOSITOL POLYPHOSPHATE 5-PHOSPHATASE 11 (AT5PTASE11)	Encodes a phosphatidylinositol polyphosphate 5-phosphatase. It can dephosphorylate PI(4,5)P2, PI(3,5)P2, and PI(3,4,5)P3, but, it is not active against PI(5)P or the water soluble inositol(1,4,5)P3 or inositol(1,3,4,5)P4. The transcript levels for this gene rise in response to auxin, ABA, and JA.
3.55556	6.61111	AT1G61440			S-locus lectin protein kinase family protein;(source:Araport11)
2.3	6.5	AT2G03020			Heat shock protein HSP20/alpha crystallin family;(source:Araport11)
5.52632	6.42105	AT5G53740			hypothetical protein;(source:Araport11)
2.13333	6.16667	AT3G13900	ALA7	AMINOPHOSPHOLIPID ATPASE 7 (ALA7)	Encodes a member of the P4 subfamily of P-type ATPases expressed in the pollen plasma membrane. Double mutants with ALA6 display pollen and pollen tube defects.
4.85714	6.14286	AT5G59310	LTP4	(ATLTPI-11);LIPID TRANSFER PROTEIN 4 (LTP4)	Encodes a member of the lipid transfer protein family. Proteins of this family are generally small (~9 kD), basic, expressed abundantly and contain eight Cys residues. The proteins can bind fatty acids and acylCoA esters and can transfer several different phospholipids. They are localized to the cell wall. The mRNA is present in flowers and siliques, and is strongly up-regulated by abscisic acid.…
2.4717	6.13208	AT1G21525			Possibly not a pseudogene based on evidence for transcription (RNA-seq) and translation (Ribo-seq) described in PMID:27791167 .
3.81481	6	AT4G24265			homeobox protein;(source:Araport11)
4.125	6	AT4G08874			transmembrane protein;(source:Araport11)
6	6	AT1G49610			F-box family protein;(source:Araport11)
6	6	AT3G06640			PAS domain-containing protein tyrosine kinase family protein;(source:Araport11)
2.61765	5.94118	AT3G06120	MUTE	MUTE (MUTE)	Encodes a basic helix-loop-helix (bHLH) protein that controls meristemoid differentiation during stomatal development. In the absence of MUTE, meristemoids abort after excessive asymmetric divisions and fail to differentiate stomata. MUTE expression in the meristemoid is required for SLGCs differentiation as pavement cells. Epidermal cells lose their competence to respond to MUTE overexpression d…
5.15099	5.88366	AT3G08770	LTP6	(ATLTPI-6);LIPID TRANSFER PROTEIN 6 (LTP6)	Predicted to encode a PR (pathogenesis-related) protein. Belongs to the lipid transfer protein (PR-14) family with the following members: At2g38540/LTP1, At2g38530/LTP2, At5g59320/LTP3, At5g59310/LTP4, At3g51600/LTP5, At3g08770/LTP6, At2g15050/LTP7, At2g18370/LTP8, At2g15325/LTP9, At5g01870/LTP10, At4g33355/LTP11, At3g51590/LTP12, At5g44265/LTP13, At5g62065/LTP14, At4g08530/LTP15.
1.71429	5.85714	AT2G18490	GAZ	GA- AND ABA-RESPONSIVE ZINC FINGER (GAZ)	GAZ is a nuclear localized transcriptional activator that is regulated (decreased) by GA and ABA levels. GAZ is expressed in the root stele and may function non-cell autonomously to effect hormone mediated control of ground tissue maturation.
4.6	5.7	AT3G42850		ARABINOKINASE 2 (ARA2)	Mevalonate/galactokinase family protein;(source:Araport11)arabinokinase activity
9.32468	5.68831	AT4G33720	CAPE3	(ATCAPE3)	CAP (Cysteine-rich secretory proteins, Antigen 5, and Pathogenesis-related 1 protein) superfamily protein;(source:Araport11)
2.55556	5.66667	AT1G75891			Natural antisense transcript overlaps with AT1G75890;(source:Araport11)
5.3125	5.625	AT4G30230			hypothetical protein;(source:Araport11)
3	5.625	AT4G01735			polyhomeotic-like protein;(source:Araport11)
2.76	5.6	AT1G24470		(ATKCR2);BETA-KETOACYL REDUCTASE 2 (KCR2)	Encodes one of the two Arabidopsis homologues to YBR159w encoding a S. cerevisiae beta-ketoacyl reductase (KCR), which catalyzes the first reduction during VLCFA (very long chain fatty acids, >18 carbon) elongation: KCR1 (At1g67730), KCR2 (At1g24470). Complementation of the yeast ybr159Delta mutant demonstrated that the two KCR proteins are divergent and that only AtKCR1 can restore heterologous …
3.5	5.5	AT5G18090			AP2/B3-like transcriptional factor family protein;(source:Araport11)
1	5.42857	AT3G28917		MINI ZINC FINGER 2 (MIF2)	mini zinc finger 2;(source:Araport11)
4	5.42105	AT1G22980			Grap2/cyclin-D-interacting protein;(source:Araport11)
2.57895	5.31579	AT4G36105			polyamine-modulated factor 1-binding protein;(source:Araport11)
4.5566	5.28302	AT3G42658		SADHU NON-CODING RETROTRANSPOSON 3-2 (SADHU3-2)	Member of Sadhu non-coding retrotransposon family.In some natural accessions the allele is methylated and silenced.
2.36	5.28	AT3G04615			Natural antisense transcript overlaps with AT3G24020;(source:Araport11)
2.45455	5.27273	AT1G72620			alpha/beta-Hydrolases superfamily protein;(source:Araport11)
6.5	5.25	AT1G09715			novel transcribed region;(source:Araport11)
3.07692	5.23077	AT1G04778			hypothetical protein;(source:Araport11)
2.21429	5.14286	AT3G49055			ATP-binding protein;(source:Araport11)
1.05	5.1375	AT5G56080		ARABIDOPSIS THALIANA NICOTIANAMINE SYNTHASE 2 (ATNAS2);NICOTIANAMINE SYNTHASE 2 (NAS2)	Encodes a protein with nicotianamine synthase activity. Its transcript levels rise in roots in response to zinc deficiency and rise in leaves in response to elevated levels of zinc.
3.125	5.125	AT2G45780			other_RNA;(source:Araport11)
1.84615	5.09615	AT4G15710			cystatin-like protein;(source:Araport11)
3.28	5.08	AT2G38995			O-acyltransferase (WSD1-like) family protein;(source:Araport11)
0.574713	5.01149	AT5G33355			Encodes a defensin-like (DEFL) family protein.
8	5	AT1G09867			None;(source:Araport11)
6.72727	5	AT2G17330	CYP51G2	CYTOCHROME P450 51G2 (CYP51G2);CYTOCHROME P450 51A1 (CYP51A1)	putative obtusifoliol 14-alpha demethylase. Expressed pseudogene.
0.545455	5	AT1G13310			Endosomal targeting BRO1-like domain-containing protein;(source:Araport11)
5.11111	5	AT3G62960	ROXY8	(ROXY8)	Encodes a member of the CC-type glutaredoxin (ROXY) family that has been shown to interact with the transcription factor TGA2.
1.94118	5	AT2G00670			novel transcribed region;(source:Araport11)
2.90698	4.97674	AT2G40670	RR16	RESPONSE REGULATOR 16 (RR16)	response regulator 16
3.44304	4.97468	AT1G04425			other_RNA;(source:Araport11)
13	4.88889	AT1G04500			CCT motif family protein;(source:Araport11)
2.875	4.875	AT1G04153			Natural antisense transcript overlaps with AT1G02870;(source:Araport11)
0.75	4.875	AT2G15590			spire, putative (DUF1685);(source:Araport11)
3.5	4.875	AT3G28500			60S acidic ribosomal protein family;(source:Araport11)
2.19497	4.87421	AT5G09730	BXL3	(ATBX3); (XYL3);BETA-XYLOSIDASE 3 (ATBXL3);BETA-XYLOSIDASE 3 (BXL3); (BX3)	Encodes a protein similar to a beta-xylosidase located in the extracellular matrix. It is able to degrade terminal arabinosyl residues and likely participates in the in-vivo hydrolysis of arabinan. This is a member of glycosyl hydrolase family 3 and has six other closely related members.
4.19048	4.85714	AT2G18660		EXPANSIN-LIKE B3 PRECURSOR (EXLB3); (AtPNP-A);PLANT NATRIURETIC PEPTIDE A (PNP-A)	Encodes PNP-A (Plant Natriuretic Peptide A). PNPs are a class of systemically mobile molecules distantly related to expansins; their biological role has remained elusive. PNP-A contains a signal peptide domain and is secreted into the extracellular space. Co-expression analyses using microarray data suggest that PNP-A may function as a component of plant defence response and SAR in particular, an…
3	4.8	AT5G24206			other_RNA;(source:Araport11)
4.16667	4.79167	AT1G52120			Mannose-binding lectin superfamily protein;(source:Araport11)
2.77778	4.77778	AT1G63630			Tetratricopeptide repeat (TPR)-like superfamily protein;(source:Araport11)
2.93182	4.75	AT5G06845			None;(source:Araport11)
4.18367	4.73469	AT1G13609			Encodes a defensin-like (DEFL) family protein.
3.77778	4.72222	AT1G07373		IRONMAN 6 (IMA6)	Member of conserved family of peptides involved in Fe uptake and homeostasis.
2.28311	4.72146	AT2G30766		FE-UPTAKE-INDUCING PEPTIDE1 (FEP1);IRONMAN 3 (IMA3)	Functions in iron homeostasis, activates iron deficiency response genes such as bHLH38, bHLH39, IRT1, and FRO2.
4.42857	4.71429	AT1G09975			novel transcribed region;(source:Araport11)
2.36559	4.69892	AT3G04255			Natural antisense transcript overlaps with AT3G22210;(source:Araport11)
3.7807	4.65789	AT1G47395		FE-UPTAKE-INDUCING PEPTIDE2 (FEP2);IRONMAN 2 (IMA2)	Involved in regulation of iron deficiency response genes.
10.8571	4.61905	AT3G22100			basic helix-loop-helix (bHLH) DNA-binding superfamily protein;(source:Araport11)
7.27778	4.61111	AT4G04220	RLP46	RECEPTOR LIKE PROTEIN 46 (AtRLP46);RECEPTOR LIKE PROTEIN 46 (RLP46)	receptor like protein 46;(source:Araport11)
4.81579	4.60526	AT5G65350	HTR11	HISTONE 3 11 (HTR11)	histone 3 11;(source:Araport11)
3.65	4.6	AT4G08910			homeobox protein;(source:Araport11)
4.28571	4.57143	AT5G27893			transmembrane protein;(source:Araport11)
7.66667	4.53333	AT5G18740			hypothetical protein (DUF3444);(source:Araport11)
4.08	4.52	AT5G15022			Natural antisense transcript overlaps with AT5G15030;(source:Araport11)
5.5	4.5	AT3G02545			Natural antisense transcript overlaps with AT3G12520;(source:Araport11)
2.53947	4.5	AT2G39510		USUALLY MULTIPLE ACIDS MOVE IN AND OUT TRANSPORTERS 14 (UMAMIT14)	Encodes a plasma membrane-localized amino acid transporter likely involved in amino acid export in the developing seed.
3.7	4.5	AT2G15130			Plant basic secretory protein (BSP) family protein;(source:Araport11)
2.93478	4.47826	AT1G09797			None;(source:Araport11)
2.10588	4.45882	AT5G08155			novel transcribed region; detected in root, root apical meristem, receptacle, leaf, dark-grown seedling, light-grown seedling, flower, pollen, aerial, shoot apical meristem;(source:Araport11)
4.8	4.4	AT4G23015			transmembrane protein;(source:Araport11)
3.90909	4.36364	AT3G19184	REM1	(REM1)	AP2/B3-like transcriptional factor family protein;(source:Araport11)
4.44444	4.35556	AT5G64910			Serine/Threonine-kinase;(source:Araport11)
4.34615	4.34615	AT1G12805			nucleotide binding protein;(source:Araport11)
1.96386	4.33735	AT1G61810		BETA-GLUCOSIDASE 45 (BGLU45)	beta-glucosidase 45;(source:Araport11)
3.43605	4.30814	AT4G00670			Remorin family protein;(source:Araport11)
1.61538	4.30769	AT4G13410	CSLA15	CELLULOSE SYNTHASE LIKE A15 (CSLA15); (ATCSLA15)	encodes a gene similar to cellulose synthase
9.52381	4.28571	AT4G29150		IQ-DOMAIN 25 (IQD25)	Member of IQ67 (CaM binding) domain containing family.
18.5455	4.27273	AT1G08090	NRT2:1	NITRATE TRANSPORTER 2:1 (ATNRT2:1);NITRATE TRANSPORTER 2 (NRT2); (NRT2;1AT);NITRATE TRANSPORTER 2:1 (NRT2:1);LATERAL ROOT INITIATION 1 (LIN1);NITRATE TRANSPORTER 2.1 (ATNRT2.1);NITRATE TRANSPORTER 2.1 (NRT2.1); (ACH1)	High-affinity nitrate transporter. Up-regulated by nitrate. Functions as a repressor of lateral root initiation independently of nitrate uptake.
1.25	4.25	AT1G71250			GDSL-motif esterase/acyltransferase/lipase. Enzyme group with broad substrate specificity that may catalyze acyltransfer or hydrolase reactions with lipid and non-lipid substrates.
1.44444	4.22222	AT4G08925			Natural antisense transcript overlaps with AT4G34120;(source:Araport11)
4.08333	4.20833	AT2G00720			novel transcribed region;(source:Araport11)
4.66667	4.16667	AT5G00760			None;(source:Araport11)
3.75	4.125	AT4G35210			carrier protein (DUF241);(source:Araport11)
2.44444	4.11111	AT1G72545			hypothetical protein;(source:Araport11)
1.22222	4.11111	AT3G12890		ACTIVATOR OF SPOMIN::LUC2 (ASML2)	Encodes a protein belonging to a class of CCT (CONSTANS, CONSTANS-like, TOC1) domain proteins. The protein contains a 43 amino acid-long sequence with high homology to the CCT domain but does not have any B-box or GATA-type zinc finger domains. Functions as a transcriptional activator and regulates the expression of at least a subset of sugar-inducible genes.
4.05594	4.0979	AT5G25090		(AtENODL13);EARLY NODULIN-LIKE PROTEIN 13 (ENODL13)	early nodulin-like protein 13;(source:Araport11)
1.90909	4.09091	AT3G53140		NICOTINATE N-METHYLTRANSFERASE (NANMT)	Nicotinate N-methyltransferase involved in N-methylnicotinate formation.
0.153846	4.07692	AT3G11920			glutaredoxin-like protein;(source:Araport11)
2.92	4.05714	AT2G14247			Expressed protein;(source:Araport11)
4.3	4.05	AT1G07167			None;(source:Araport11)
2.42647	4.04412	AT1G33960		IMMUNE ASSOCIATED NUCLEOTIDE BINDING 8 (IAN8);AVRRPT2-INDUCED GENE 1 (AIG1)	Identified as a gene that is induced by avirulence gene avrRpt2 and RPS2 after infection with Pseudomonas syringae pv maculicola strain ES4326 carrying avrRpt2
0.976471	4.02353	AT4G31970		CYTOCHROME P450, FAMILY 82, SUBFAMILY C, POLYPEPTIDE 2 (CYP82C2)	Functions in the biosynthesis of 4-hydroxy indole-3-carbonyl nitrile (4-OH-ICN), a cyanogenic phytoalexin in Arabidopsis. CYP82C2 acts as a hydroxylase on indole-3-carbonyl nitrile to generate 4-OH-ICN.
2.94444	4.01852	AT5G42700			AP2/B3-like transcriptional factor family protein;(source:Araport11)
3.19892	4.00538	AT1G43590			transposable_element_gene;(source:Araport11);similar to unknown protein [Arabidopsis thaliana] (TAIR:AT5G34838.1);(source:TAIR10)
3.29268	4	AT4G26260		MYO-INOSITOL OXYGENASE 4 (MIOX4)	Encodes a myo-inositol oxygenase, which is the first enzyme in the inositol route to ascorbate (L&#8208;ascorbic acid, AsA, vitamin C). Overexpression results in enhanced biomass and abiotic stress tolerance.
2.11111	4	AT2G25410		ARABIDOPSIS TOXICOS EN LEVADURA 22 (ATL22)	RING/U-box superfamily protein;(source:Araport11)
4	4	AT2G28426			hypothetical protein;(source:Araport11)
4.85714	4	AT1G51538			Aminotransferase-like, plant mobile domain family protein;(source:Araport11)
3.89189	3.94595	AT2G08735			None;(source:Araport11)
2.72897	3.94393	AT1G34245	EPF2	EPIDERMAL PATTERNING FACTOR 2 (EPF2)	Encodes a secretory peptide EPF2 expressed in proliferating cells of the stomatal lineage, known as meristemoids, and in guard mother cells, the progenitors of stomata. Controls asymmetric cell divisions during stomatal development. EPF2 is related to EPF1, also involved in stomatal development. Its transcript levels change after inducing MUTE expression in a mute background. EPF2 binds to the ER…
3.96552	3.93103	AT5G01420			Glutaredoxin family protein;(source:Araport11)
1.88462	3.92308	AT1G19830		SMALL AUXIN UPREGULATED RNA 54 (SAUR54)	SAUR-like auxin-responsive protein family;(source:Araport11)
3.83333	3.91667	AT4G12580			hypothetical protein;(source:Araport11)
1.3125	3.90625	AT3G27025	LAZY6	(LAZY6)	Encodes a member of the LAZY gene family that is expressed in the shoot apex.
2.77778	3.88889	AT5G60142			AP2/B3-like transcriptional factor family protein;(source:Araport11)
0.914286	3.88571	AT5G27845			transposable_element_gene;(source:Araport11);non-LTR retrotransposon family (LINE), has a 6.6e-32 P-value blast match to GB:AAA39398 ORF2 (Mus musculus) (LINE-element);(source:TAIR10)
1.71429	3.85714	AT1G64020			Serine protease inhibitor (SERPIN) family protein;(source:Araport11)
3.08696	3.82609	AT1G60787			cysteine/histidine-rich C1 domain protein;(source:Araport11)
9	3.8	AT1G07823			Natural antisense transcript overlaps with AT1G52580;(source:Araport11)
2.15254	3.79661	AT1G10657	DEG17	(DEG17)	transmembrane protein;(source:Araport11)
1.71429	3.78571	AT4G04005			Natural antisense transcript overlaps with AT4G01897;(source:Araport11)
6.30769	3.76923	AT1G12030			phosphoenolpyruvate carboxylase, putative (DUF506);(source:Araport11)
0.148936	3.76596	AT3G03480	CHAT	ACETYL COA:(Z)-3-HEXEN-1-OL ACETYLTRANSFERASE (CHAT)	acetyl CoA:(Z)-3-hexen-1-ol acetyltransferase;(source:Araport11)
3.2	3.76	AT5G10890			myosin heavy chain-like protein;(source:Araport11)
4	3.66667	AT3G28350			Pseudogene of AT3G28350; unknown protein
6.83333	3.66667	AT1G78410			VQ motif-containing protein;(source:Araport11)
2.83333	3.66667	AT2G12450			transposable_element_gene;(source:Araport11);gypsy-like retrotransposon family, has a 1.7e-96 P-value blast match to GB:AAD11615 prpol (gypsy_Ty3-element) (Zea mays);(source:TAIR10)
1.44444	3.66667	AT1G02630			Nucleoside transporter family protein;(source:Araport11)
2.28571	3.64286	AT2G00740			novel transcribed region;(source:Araport11)
2.4	3.63333	AT3G28620			Zinc finger, C3HC4 type (RING finger) family protein;(source:Araport11)
1.33333	3.62963	AT2G02455			transmembrane protein;(source:Araport11)
3.3125	3.625	AT4G38410			Dehydrin family protein;(source:Araport11)
2.33898	3.61017	AT5G24200			alpha/beta-Hydrolases superfamily protein;(source:Araport11)
3.13725	3.60784	AT1G65480	FT	REDUCED STEM BRANCHING 8 (RSB8);FLOWERING LOCUS T (FT)	FT, together with LFY, promotes flowering and is antagonistic with its homologous gene, TERMINAL FLOWER1 (TFL1). Together with TSF, it plays an antagonistic role to TFL1 in the determination of inflorescence meristem identity. FT is expressed in leaves and is induced by long day treatment. Either the FT mRNA or protein is translocated to the shoot apex where it induces its own expression. Recent …
2.96	3.6	AT5G46220	TOD1	TURGOR REGULATION DEFECT 1 (TOD1)	Encodes a protein with alkaline ceramidase activity that is involved in regulation of turgor during pollen tube growth and silique stomatal movement. Tod1 is expressed specifically in pollen and silique guard cells. Loss of function mutations have reduced fertility due to defects in pollen transmission.
1.5	3.6	AT5G41763			hypothetical protein;(source:Araport11)
3	3.59375	AT4G37810	EPFL2	(ATEPFL2); (EPFL2)	Memmber of the EPF/EPFL (epidermal patterning factor/EPF-like) gene family, which genes encode plant-specific secretory peptides, several of which play a role in controlling stomatal density and patterning in the plant epidermis.
0.703704	3.59259	AT2G40200			basic helix-loop-helix (bHLH) DNA-binding superfamily protein;(source:Araport11)
1.39583	3.58333	AT1G12070			Immunoglobulin E-set superfamily protein;(source:Araport11)
2.53782	3.57983	AT1G10640			Pectin lyase-like superfamily protein;(source:Araport11)
1.24242	3.57576	AT2G23010		SERINE CARBOXYPEPTIDASE-LIKE 9 (SCPL9)	serine carboxypeptidase-like 9;(source:Araport11)
3.98319	3.56303	AT3G45070	SULT202B1	SULFOTRANSFERASE 202B1 (SULT202B1); (ATSULT202B1)	Encodes a sulfotransferase with sulfating activity toward flavonoids.
3.375	3.5625	AT4G07170			None;(source:Araport11)
2.25	3.5625	AT3G00500			novel transcribed region;(source:Araport11)
4.2549	3.54902	AT2G28210		ALPHA CARBONIC ANHYDRASE 2 (ACA2);ALPHA CARBONIC ANHYDRASE 2 (ATACA2)	alpha carbonic anhydrase 2;(source:Araport11)
3.74757	3.52427	AT5G07690	MYB29	REGULATOR OF ALTERNATIVE OXIDASE 1A 7 (RAO7);PRODUCTION OF METHIONINE-DERIVED GLUCOSINOLATE 2 (PMG2);MYB DOMAIN PROTEIN 29 (ATMYB29);MYB DOMAIN PROTEIN 29 (MYB29)	Encodes a putative transcription factor (MYB29) that acts as a negative regulator of mitochondrial stress responses.
2.87302	3.52381	AT1G47400		IRONMAN 1 (IMA1);FE-UPTAKE-INDUCING PEPTIDE3 (FEP3)	Involved in regulation of iron deficiency response genes. Overexpression results in hyperaccumulation of Fe and Mn.
1.11176	3.5	AT1G17810		(TIP3;2);BETA-TONOPLAST INTRINSIC PROTEIN (BETA-TIP); (TIP3.2)	beta-tonoplast intrinsic protein (beta-TIP) mRNA, complete
2.125	3.5	AT2G23945			Eukaryotic aspartyl protease family protein;(source:Araport11)
3.5625	3.5	AT3G03565			novel transcribed region; detected in root, carpel, receptacle, light-grown seedling, aerial;(source:Araport11)
2.97403	3.48052	AT3G06778			Chaperone DnaJ-domain superfamily protein;(source:Araport11)
2	3.46667	AT5G48390		(ATZIP4);A. THALIANA HOMOLOGUE OF YEAST SPO22 (ATSPO22)	Defective in meiotic chromosome segregation. It is involved in crossover formation and involved in both male and female meiosis.
1.87559	3.45827	AT2G43510		TRYPSIN INHIBITOR PROTEIN 1 (ATTI1);TRYPSIN INHIBITOR PROTEIN 1 (TI1)	Member of the defensin-like (DEFL) family. Encodes putative trypsin inhibitor protein which may function in defense against herbivory.
1.24242	3.45455	AT5G59330			Bifunctional inhibitor/lipid-transfer protein/seed storage 2S albumin superfamily protein;(source:Araport11)
3	3.45455	AT3G46300			hypothetical protein;(source:Araport11)
2.20896	3.44776	AT3G25905	CLE27	CLAVATA3/ESR-RELATED 27 (CLE27)	Member of a large family of putative ligands homologous to the Clavata3 gene. Consists of a single exon.
3.57895	3.42105	AT2G08760			None;(source:Araport11)
2.5	3.41667	AT2G29410		METAL TOLERANCE PROTEIN B1 (MTPB1);METAL-TOLERANCE PROTEIN 4 (MTP4); (ATMTPB1)	member of Zinc transporter (ZAT) family
2.2875	3.4	AT5G38300			homeobox Hox-B3-like protein;(source:Araport11)
2.84615	3.38462	AT2G09455			Natural antisense transcript overlaps with AT2G43350;(source:Araport11)
4.0625	3.375	AT1G09475			novel transcribed region;(source:Araport11)
2.41667	3.36905	AT4G39320			microtubule-associated protein-like protein;(source:Araport11)
2.64935	3.36883	AT3G05600		EPOXIDE HYDROLASE 1 (ATEH1)	Encodes a cytosolic epoxide hydrolase capable of acting on 9,10-epoxystearic acid and on 12,13- epoxyoctadec-9-enoic acid that is involved in the synthesis of poly-hydroxylated cutin monomers.
1.84756	3.36585	AT1G78530			Protein kinase superfamily protein;(source:Araport11)
2.63636	3.36364	AT1G24147			transmembrane protein;(source:Araport11)
2.30657	3.35766	AT1G60270	BGLU6	BETA GLUCOSIDASE 6 (BGLU6)	beta glucosidase 6;(source:Araport11)
1.82353	3.35294	AT2G19980			CAP (Cysteine-rich secretory proteins, Antigen 5, and Pathogenesis-related 1 protein) superfamily protein;(source:Araport11)
2.25	3.35	AT4G03005			novel transcribed region;(source:Araport11)
1.65	3.35	AT1G75785			protein TUB21;(source:Araport11)
1.16667	3.33333	AT4G38870			F-box and associated interaction domains-containing protein;(source:Araport11)
2.71845	3.32039	AT1G45191	BGLU1	BETA GLUCOSIDASE 1 (BGLU1)	beta-glucosidase related protein, similar to beta-glucosidase GI:3820531 from (Pinus contorta); contains Pfam profile: PF00232 Glycosyl hydrolase family 1
2.70312	3.3125	AT5G60880	BASL	BREAKING OF ASYMMETRY IN THE STOMATAL LINEAGE (BASL)	Encodes BASL (BREAKING OF ASYMMETRY IN THE STOMATAL LINEAGE), a regulator of asymmetric divisions. In asymmetrically dividing stomatal-lineage cells, BASL accumulates in a polarized crescent at the cell periphery before division, and then localizes differentially to the nucleus and a peripheral crescent in self-renewing cells and their sisters after division. Its transcript levels change after in…
3.73077	3.30769	AT1G07270	CDC6B	(CDC6B)	Cell division control, Cdc6;(source:Araport11)
2.23077	3.30769	AT2G36110			Polynucleotidyl transferase, ribonuclease H-like superfamily protein;(source:Araport11)
2.97561	3.29268	AT3G57160			cysteine-rich TM module stress tolerance protein;(source:Araport11)
1.38889	3.27778	AT5G28650		ARABIDOPSIS THALIANA WRKY DNA-BINDING PROTEIN 74 (ATWRKY74);WRKY DNA-BINDING PROTEIN 74 (WRKY74)	member of WRKY Transcription Factor; Group II-d
2.55556	3.26667	AT5G45990			crooked neck protein, putative / cell cycle protein;(source:Araport11)
2.52978	3.25705	AT4G02800	MADA1	(MADA1)	GRIP/coiled-coil protein;(source:Araport11)
3.03448	3.24138	AT1G73040			Mannose-binding lectin superfamily protein;(source:Araport11)
2.25641	3.23077	AT4G19590			Chaperone DnaJ-domain superfamily protein;(source:Araport11)
1.92593	3.22222	AT1G08217			None;(source:Araport11)
2.73063	3.2214	AT5G53210	SPCH	SPEECHLESS	basic helix-loop-helix (bHLH) transcription factor that is necessary and sufficient for the asymmetric divisions that establish the stomatal lineage
1	3.2	AT1G43040		SMALL AUXIN UPREGULATED RNA 58 (SAUR58)	SAUR-like auxin-responsive protein family;(source:Araport11)
0.6	3.2	AT5G14860			UDP-Glycosyltransferase superfamily protein;(source:Araport11)
2.07407	3.18519	AT1G08687			novel transcribed region; detected in root, root apical meristem, receptacle, leaf, dark-grown seedling, light-grown seedling, flower, shoot apical meristem;(source:Araport11)
4.787	3.18051	AT1G26380	FOX1	FAD-LINKED OXIDOREDUCTASE 1 (FOX1); (ATBBE3);FAD-LINKED OXIDOREDUCTASE (FOX)	Functions in the biosynthesis of 4-hydroxy indole-3-carbonyl nitrile (4-OH-ICN), a cyanogenic phytoalexin in Arabidopsis. FOX1 acts as a dehydrogenase on indole cyanohydrin to form indole carbonyl nitrile.
1.35294	3.17647	AT1G09287			Natural antisense transcript overlaps with AT1G71950;(source:Araport11)
2.8	3.17143	AT5G49152			Natural antisense transcript overlaps with AT5G49150;(source:Araport11)
3.83333	3.16667	AT4G22110			GroES-like zinc-binding dehydrogenase family protein;(source:Araport11)
0.777778	3.16667	AT3G10780			emp24/gp25L/p24 family/GOLD family protein;(source:Araport11)
2.23358	3.16058	AT5G27890			hypothetical protein;(source:Araport11)
1.5942	3.15942	AT5G35490		MTO 1 RESPONDING UP 1 (MRU1);ARABIDOPSIS MTO 1 RESPONDING UP 1 (ATMRU1)	Encodes MRU1 (mto 1 responding up). Up-regulated in mto1-1 mutant that over-accumulates soluble methionine. A maternally expressed imprinted gene.
3.0625	3.15625	AT1G47990	GA2OX4	GIBBERELLIN 2-OXIDASE 4 (GA2OX4);ARABIDOPSIS THALIANA GIBBERELLIN 2-OXIDASE 4 (ATGA2OX4)	Encodes a gibberellin 2-oxidase that acts on C19 gibberellins. AtGA2OX4 expression is responsive to cytokinin and KNOX activities.
3.23077	3.15385	AT4G06980			None;(source:Araport11)
2	3.15385	AT1G75394			Pseudogene of AT2G31305
2.42857	3.14286	AT2G10605			transposable_element_gene;(source:Araport11);pseudogene, similar to putative reverse transcriptase, blastp match of 27%25 identity and 2.7e-06 P-value to GP|20279456|gb|AAM18736.1|AC092548_14|AC092548 putative reverse transcriptase {Oryza sativa (japonica cultivar-group)};(source:TAIR10)
2.89474	3.14035	AT4G29030			Putative membrane lipoprotein;(source:Araport11)
3.08333	3.13889	AT2G34240			ubiquitin carboxyl-terminal hydrolase-like protein, putative (Protein with domains of unknown function DUF627 and DUF632);(source:Araport11)
2.9604	3.13366	AT4G31805		POLAR LOCALIZATION DURING ASYMMETRIC DIVISION AND REDISTRIBUTION (POLAR)	Encodes POLAR, a scaffold protein associated with cellular asymmetry of meristemoids. Its transcript levels change after inducing MUTE expression in a mute background.
1.8	3.13333	AT3G16160	TCX8	(TCX8)	Tesmin/TSO1-like CXC domain-containing protein;(source:Araport11)
2.75	3.125	AT3G02435			None;(source:Araport11)
5.5	3.125	AT1G68480	JAG	JAGGED (JAG)	Encodes a putative zinc finger transcription factor that is necessary for proper lateral organ shape and is sufficient to induce the proliferation of lateral organ tissue. Together with NUB, it is involved in stamen and carpel development.
1.7628	3.1159	AT5G54075		U3 SMALL NUCLEOLAR RNAD (U3D)	U3 small nucleolar RNA
5.11111	3.11111	AT5G02225			Natural antisense transcript overlaps with AT5G14440;(source:Araport11)
3.55	3.1	AT3G11640			transmembrane protein;(source:Araport11)
1.6	3.1	AT2G05370			RNA-dependent RNA polymerase-like protein;(source:Araport11)
2.32895	3.09211	AT5G06720	PA2	PEROXIDASE 2 (ATPA2);PEROXIDASE 2 (PA2);PEROXIDASE 53 (PRX53); (ATPRX53)	Encodes a peroxidase with diverse roles in the wound response, flower development, and syncytium formation.
2.15909	3.09091	AT3G42725			Putative membrane lipoprotein;(source:Araport11)
10.4545	3.09091	AT3G09520		EXOCYST SUBUNIT EXO70 FAMILY PROTEIN H4 (EXO70H4);EXOCYST SUBUNIT EXO70 FAMILY PROTEIN H4 (ATEXO70H4)	A member of EXO70 gene family, putative exocyst subunits, conserved in land plants. Arabidopsis thaliana contains 23 putative EXO70 genes, which can be classified into eight clusters on the phylogenetic tree.
1.16667	3.08333	AT3G45280		(ATSYP72);SYNTAXIN OF PLANTS 72 (SYP72)	syntaxin of plants 72 (SYP72)
2.08333	3.08333	AT4G11780		TON1 RECRUITING MOTIF 10 (TRM10)	GAR2-like protein;(source:Araport11)
1.92	3.08	AT2G18120		SHI-RELATED SEQUENCE 4 (SRS4)	A member of SHI gene family. Arabidopsis thaliana has ten members that encode proteins with a RING finger-like zinc finger motif. Despite being highly divergent in sequence, many of the SHI-related genes are partially redundant in function and synergistically promote gynoecium, stamen and leaf development in Arabidopsis.
3.20455	3.07955	AT1G52700			alpha/beta-Hydrolases superfamily protein;(source:Araport11)
3.30769	3.07692	AT1G09835			novel transcribed region;(source:Araport11)
0.392361	3.07639	AT1G01580	FRO2	FERRIC REDUCTION OXIDASE 2 (FRO2);FERRIC REDUCTION OXIDASE 2 (ATFRO2);FERRIC CHELATE REDUCTASE DEFECTIVE 1 (FRD1)	Encodes the low-iron-inducible ferric chelate reductase responsible for reduction of iron at the root surface. It is likely to be the major Fe(III) chelate reductase in Arabidopsis iron metabolism. Coordinately regulated with IRT1, the major transporter responsible for high-affinity iron uptake from the soil, at both transcriptional and posttranscriptional levels. Steady state mRNA levels are reg…
1.43902	3.07317	AT1G01380		ENHANCER OF TRY AND CPC 1 (ETC1)	ETC1 is involved in trichome and root hair patterning in Arabidopsis.
2.44444	3.06667	AT4G03270	CYCD6;1	CYCLIN D6;1 (CYCD6;1)	Cyclin D6, involved in cortex/endodermis asymmetric stem cell division.
2.75	3.05	AT4G04225			Natural antisense transcript overlaps with AT4G02620;(source:Araport11)
2.45833	3.04167	AT1G11915			wall-associated receptor kinase galacturonan-binding protein;(source:Araport11)
1.86869	3.0404	AT1G07880	MPK13	(ATMPK13)	member of MAP Kinase
1.82624	3.03546	AT1G06350		ECERIFERUM 17 (CER17); (CER17); (ATADS4);DELTA 9 DESATURASE 4 (ADS4)	Fatty acid desaturase family protein;(source:Araport11)
3.125	3.02083	AT5G50930	MHF1	(ATMHF1);HOMOLOG OF HUMAN MHF1 (MHF1)	Encodes a protein with similarity to mammalian MHF1 that acts in the same pathway as FANCM to restrain class II meiotic crossing over, and acts with FANCM during meiosis and to repair cross-links. It also assumes an opposing role from FANCM in homologous recombination and only FANCM is essential for replicative repair in the absence of the endonuclease MUS81.
3.06024	3.01205	AT4G01270			RING/U-box superfamily protein;(source:Araport11)
1.49354	3.00566	AT1G04800			glycine-rich protein;(source:Araport11)
1.21053	3	AT1G18197			GCK domain protein;(source:Araport11)
1.40909	3	AT1G07050		FITNESS (FITNESS)	FITNESS encodes a protein with a single CCT domain and belongs to the CCT motif family genes (CMF). FITNESS acts upstream JUB1 thereby controlling H2O2 levels. FITNESS has a role in cellular redox homeostasis controlling H2O2 levels, due to changes in enzymes, metabolites and transcripts related to ROS detoxification.
2.09524	3	AT5G27889			This gene encodes a small protein and has either evidence of transcription or purifying selection.
1.63793	3	AT2G16580		SMALL AUXIN UPREGULATED RNA 8 (SAUR8)	SAUR-like auxin-responsive protein family;(source:Araport11)
1.28571	3	AT5G55950			Nucleotide/sugar transporter family protein;(source:Araport11)
0.823529	3	AT3G03315			novel transcribed region; detected in root, root apical meristem, dark-grown seedling, light-grown seedling, aerial;(source:Araport11)
3.75	3	AT1G09745			novel transcribed region;(source:Araport11)
3.125	3	AT5G50610			transmembrane protein;(source:Araport11)
3.125	3	AT5G50710			transmembrane protein;(source:Araport11)
2	3	AT4G11470		CYSTEINE-RICH RLK (RECEPTOR-LIKE PROTEIN KINASE) 31 (CRK31)	Encodes a cysteine-rich receptor-like protein kinase.
2.45455	3	AT1G27045		HOMEOBOX PROTEIN 54 (HB54);HOMEOBOX PROTEIN 54 (ATHB54)	Encodes ATHB54, a member of the homeodomain leucine zipper (HD-Zip) family protein. Please note that this locus was split from AT1G27050 in the TAIR10 genome release (2010). Affymetrix ATH1 Probe Set linked to symbol ATHB54 is in fact directed against the product of the AT1G27050 locus (the mRNA coding for the RNA-recognition-motif protein).
5.71429	3	AT3G47770		A. THALIANA ABC2 HOMOLOG 5 (ATATH5);ATP-BINDING CASSETTE A6 (ABCA6);ABC2 HOMOLOG 5 (ATH5)	ABC2 homolog 5;(source:Araport11)
3.8	3	AT1G47630		CYTOCHROME P450, FAMILY 96, SUBFAMILY A, POLYPEPTIDE 7 (CYP96A7)	member of CYP96A
2.21053	3	AT5G59390			XH/XS domain-containing protein;(source:Araport11)
3.2	3	AT4G11590			F-box associated ubiquitination effector family protein;(source:Araport11)
2.72727	3	AT3G15170	CUC1,NAC054	CUP-SHAPED COTYLEDON1 (CUC1); (ATNAC1);ARABIDOPSIS NAC DOMAIN CONTAINING PROTEIN 54 (ANAC054)	Encodes a transcription factor involved in shoot apical meristem formation and cotyledon separation. Functions redundantly with CUC2 and CUC3. The cuc1 cuc2 double mutant phenotype is first detectable at the heart stage, as embryos lacking two distinct bulges of cotyledonary primordia.In post embryonic development it plays a role in axillary meristem formation, boundary separation, gynoecium and …
4.16667	3	AT3G18715		INFLORESCENCE DEFICIENT IN ABSCISSION (IDA)-LIKE 4 (IDL4)	Similar to Inflorescance deficient in abscission (IDA). Involved in floral organ abscission.
1.96875	2.98958	AT5G27895			transposable_element_gene;(source:Araport11);gypsy-like retrotransposon family, has a 3.2e-102 P-value blast match to GB:AAD11615 prpol (gypsy_Ty3-element) (Zea mays);(source:TAIR10)
1.06667	2.96812	AT1G15405			other_RNA;(source:Araport11)
2.62111	2.96752	AT2G25060	ENODL14	(AtENODL14);EARLY NODULIN-LIKE PROTEIN 14 (ENODL14)	early nodulin-like protein 14;(source:Araport11)
4.32	2.96	AT2G02380	GSTZ2	GLUTATHIONE S-TRANSFERASE (CLASS ZETA) 2 (GSTZ2);GLUTATHIONE S-TRANSFERASE (CLASS ZETA) 2 (ATGSTZ2)	Encodes glutathione transferase belonging to the zeta class of GSTs. Naming convention according to Wagner et al. (2002).
4.73684	2.94737	AT1G61470		CCR4-ASSOCIATED FACTOR 1E (CAF1E)	Deadenylase.
2.09091	2.94545	AT1G70510		ARABIDOPSIS THALIANA KN 1 (ATK1);KNOTTED-LIKE FROM ARABIDOPSIS THALIANA 2 (KNAT2)	A member of class I knotted1-like homeobox gene family (together with KNAT1). Similar to the knotted1 (kn1) homeobox gene of maize. KNAT2 acts synergistically with cytokinins and antagonistically with ethylene based on ectopic expression studies in different mutant backgrounds and hormone treatments. In addition, KNAT2 is negatively regulated by AS and YABBY genes. KNAT2 is strongly expressed in …
2.47059	2.94118	AT3G20075		CYTOCHROME P450, FAMILY 705, SUBFAMILY A, POLYPEPTIDE 14 PSEUDOGENE (CYP705A14P)	a pseudogene with cytochrome P450 domain
2.03368	2.93264	AT1G19610	PDF1.4	(PDF1.4);LOW-MOLECULAR-WEIGHT CYSTEINE-RICH 78 (LCR78)	Predicted to encode a PR (pathogenesis-related) protein. Belongs to the plant defensin (PDF) family with the following members: At1g75830/PDF1.1, At5g44420/PDF1.2a, At2g26020/PDF1.2b, At5g44430/PDF1.2c, At2g26010/PDF1.3, At1g19610/PDF1.4, At1g55010/PDF1.5, At2g02120/PDF2.1, At2g02100/PDF2.2, At2g02130/PDF2.3, At1g61070/PDF2.4, At5g63660/PDF2.5, At2g02140/PDF2.6, At5g38330/PDF3.1 and At4g30070/PDF…
2.10345	2.93103	AT2G06200		GROWTH-REGULATING FACTOR 6 (AtGRF6);GROWTH-REGULATING FACTOR 6 (GRF6)	Growth regulating factor encoding transcription activator. One of the nine members of a GRF gene family, containing nuclear targeting domain. Involved in leaf development and expressed in root, shoot and flower
2.67692	2.93077	AT1G78430		ROP INTERACTIVE PARTNER 4 (RIP4);ROP INTERACTIVE PARTNER 2 (RIP2);INTERACTOR OF CONSTITUTIVELY ACTIVE ROP4 (ICR4)	Encodes RIP2 (ROP interactive partner 2), a putative Rho protein effector, interacting specifically with the active form of ROPs (Rho proteins of plants).
1.14286	2.92857	AT5G21150		ARGONAUTE 9 (AGO9)	AGO9-dependent sRNA silencing is crucial to specify cell fate in the Arabidopsis ovule. AGO9 is expressed in reproductive companion cells but not in the associated male or female gametes or their precursors. Therefore, AGO9 acts non-cell autonomously to silencing the activity of TEs activity in the female gametophyte.Loss of function mutants produce ectopic megaspore mother cell and supernumary f…
2.38272	2.92593	AT1G09945			novel transcribed region;(source:Araport11)
3.61951	2.91707	AT1G12880		NUDIX HYDROLASE HOMOLOG 12 (NUDT12);NUDIX HYDROLASE HOMOLOG 12 (atnudt12)	nudix hydrolase homolog 12;(source:Araport11)
1.82609	2.91304	AT1G71866	EPFL7	EPIDERMAL PATTERNING FACTOR LIKE 7 (EPFL7)	Member of the EPF/EPFL (epidermal patterning factor/EPF-like) gene family, which genes encode plant-specific secretory peptides, several of which play a role in controlling stomatal density and patterning in the plant epidermis.
2.51721	2.90589	AT5G47500		PECTIN METHYLESTERASE 5 (PME5)	predicted to encode a pectin methylesterase
1.8209	2.90547	AT5G53902		U3 SMALL NUCLEOLAR RNAB (U3B)	U3 small nucleolar RNA
1.59574	2.89362	AT2G36355			RAB6-interacting golgin (DUF662);(source:Araport11)
1.25	2.88889	AT4G09435			disease resistance protein (TIR-NBS-LRR class) family protein;(source:Araport11)
2.18135	2.88083	AT2G37300		ATP-BINDING CASSETTE I16 (ABCI16)	transmembrane protein;(source:Araport11)
2.41667	2.875	AT1G67460			Minichromosome maintenance (MCM2/3/5) family protein;(source:Araport11)
2.16667	2.87255	AT3G00490			novel transcribed region;(source:Araport11)
3.56667	2.86667	AT2G40180	PP2C5	PHOSPHATASE 2C5 (ATHPP2C5);PHOSPHATASE 2C5 (PP2C5)	Encodes PP2C5, a member of the PP2C family phosphatases. PP2C5 acts as a MAPK phosphatase that positively regulates seed germination, stomatal closure and ABA-inducible gene expression.
2.25581	2.86047	AT5G28263			transposable_element_gene;(source:Araport11);Mutator-like transposase family, has a 4.6e-72 P-value blast match to Q9SL18 /349-510 Pfam PF03108 MuDR family transposase (MuDr-element domain);(source:TAIR10)
0.814815	2.85185	AT2G37870			Bifunctional inhibitor/lipid-transfer protein/seed storage 2S albumin superfamily protein;(source:Araport11)
2.08925	2.85155	AT4G02970		7SL RNA1 (AT7SL-1)	Signal recognition particle. Type 4 of RNA polymerase III dependent genes.
3.13208	2.84906	AT2G37960			myosin-M heavy protein;(source:Araport11)
3.94737	2.84211	AT5G46871			Encodes a defensin-like (DEFL) family protein.
4.77372	2.83942	AT4G03060	AOP2	ALKENYL HYDROXALKYL PRODUCING 2 (AOP2)	Encodes a truncated and null function protein, due to a 5-bp deletion in cDNA. The functional allele in ecotype Cvi, AOP2, encodes a 2-oxoglutarate-dependent dioxygenase which is involved in glucosinolate biosynthesis. The natural variation in this locus explains the diversification of alkenyl glucosinolate among different ecotypes of Arabidopsis.
0.483871	2.83871	AT5G56970	CKX3	(ATCKX3);CYTOKININ OXIDASE 3 (CKX3)	It encodes a protein whose sequence is similar to cytokinin oxidase/dehydrogenase, which catalyzes the degradation of cytokinins.Acts on N6-(2-isopentenyl)adenine 9-riboside.
2.3	2.8375	AT2G12170			hypothetical protein;(source:Araport11)
3.5	2.83333	AT5G44063			hypothetical protein;(source:Araport11)
1.52778	2.83333	AT5G49070		3-KETOACYL-COA SYNTHASE 21 (KCS21)	Encodes KCS21, a member of the 3-ketoacyl-CoA synthase family involved in the biosynthesis of VLCFA (very long chain fatty acids).
2.26667	2.83333	AT3G48790			Pyridoxal phosphate (PLP)-dependent transferases superfamily protein;(source:Araport11)
2.25424	2.83051	AT5G20640			LURP-one-like protein (DUF567);(source:Araport11)
1.47727	2.82955	AT1G34580			Major facilitator superfamily protein;(source:Araport11)
1.03509	2.82456	AT3G00390			novel transcribed region;(source:Araport11)
2.64706	2.82353	AT3G01630			Major facilitator superfamily protein;(source:Araport11)
3.94118	2.82353	AT1G05833			Natural antisense transcript overlaps with AT1G23820;(source:Araport11)
2.20779	2.81818	AT1G58590			other_RNA;(source:Araport11)
1.63077	2.81538	AT4G24910			glucuronoxylan 4-O-methyltransferase-like protein (DUF579);(source:Araport11)
3.5618	2.80899	AT3G16360		HPT PHOSPHOTRANSMITTER 4 (AHP4)	Encodes AHP4, a histidine-containing phosphotransmitter involved in Histidine (His)-to-Aspartate (Asp) phosphorelay signal transduction. AHP4 is one of the six Arabidopsis thaliana histidine phosphotransfer proteins (AHPs). AHPs function as redundant positive regulators of cytokinin signaling. Members of the AHP gene family include: AT3G21510 (AHP1), AT3G29350 (AHP2), AT5G39340 (AHP3), AT3G16360 …
1.34615	2.80769	AT2G11150			pseudogene of putative replication protein A1
4	2.8	AT2G09685			None;(source:Araport11)
2.28889	2.8	AT5G53486			transmembrane protein;(source:Araport11)
1.9959	2.79918	AT3G59765			None;(source:Araport11)
3.94737	2.78947	AT1G02800		CELLULASE 2 (ATCEL2);CELLULASE 2 (CEL2); (CEL2)	Encodes a protein with similarity to endo-1,4-b-glucanases and is a member of Glycoside Hydrolase Family 9. CEL2 is induced by nemotodes and is expressed in syncitia induced by Heterodera schachtii.May be involved in the development and function of syncitia.
1.86	2.78	AT3G59710			NAD(P)-binding Rossmann-fold superfamily protein;(source:Araport11)
1	2.77778	AT1G69480			EXS (ERD1/XPR1/SYG1) family protein;(source:Araport11)
1.69388	2.77551	AT3G62740		BETA GLUCOSIDASE 7 (BGLU7)	beta glucosidase 7;(source:Araport11)
3.24088	2.77372	AT1G55200			kinase with adenine nucleotide alpha hydrolases-like domain-containing protein;(source:Araport11)
2.65458	2.77347	AT3G47350		HYDROXYSTEROID DEHYDROGENASE 2 (AtHSD2);HYDROXYSTEROID DEHYDROGENASE 2 (HSD2)	Encodes a putative hydroxysteroid dehydrogenase (HSD). Genes that encode HSD include: At5g50600 and At5g50700 (HSD1), At3g47350(HSD2), At3g47360(HSD3), At5g50590 and At5g50690(HSD4), At5g50770(HSD6) (Plant Cell Physiology 50:1463). Two copies of HSD1 and HSD4 exist due to a gene duplication event. In Plant Physiology 145:87, At5g50690 is HSD7, At4g10020 is HSD5.
1.84375	2.77083	AT5G59320		LIPID TRANSFER PROTEIN 3 (LTP3)	Predicted to encode a PR (pathogenesis-related) protein. Belongs to the lipid transfer protein (PR-14) family with the following members: At2g38540/LTP1, At2g38530/LTP2, At5g59320/LTP3, At5g59310/LTP4, At3g51600/LTP5, At3g08770/LTP6, At2g15050/LTP7, At2g18370/LTP8, At2g15325/LTP9, At5g01870/LTP10, At4g33355/LTP11, At3g51590/LTP12, At5g44265/LTP13, At5g62065/LTP14, At4g08530/LTP15. The mRNA is cel…
1.38462	2.76923	AT4G37235		CASP-LIKE PROTEIN 5C1 (CASPL5C1)	Uncharacterized protein family (UPF0497);(source:Araport11)
2.82068	2.75929	AT4G33260	CDC20.2	(AtCDC20.2);CELL DIVISION CYCLE 20.2 (CDC20.2)	Encodes a CDC20 protein that interacts with APC subunits, components of the mitochondrial checkpoint complex and mitotic cyclin substrates and is indispensable for normal plant development and fertility.
3.09091	2.75758	AT5G00590			novel transcribed region;(source:Araport11)
1.72	2.752	AT2G19590	ACO1	(ATACO1);ACC OXIDASE 1 (ACO1)	encodes a protein whose sequence is similar to 1-aminocyclopropane-1-carboxylate oxidase
3	2.75	AT5G16530	PIN5	PIN-FORMED 5 (PIN5)	Encodes PIN5, an atypical member of the PIN family. PIN5 is a functional auxin transporter that is required for auxin-mediated development. PIN5 does not have a direct role in cell-to-cell transport but regulates intracellular auxin homeostasis and metabolism. PIN5 localizes, unlike other characterized plasma membrane PIN proteins, to endoplasmic reticulum (ER), presumably mediating auxin flow fr…
2.83333	2.75	AT1G79915			Putative methyltransferase family protein;(source:Araport11)
3.18246	2.74737	AT1G65860	FMO GS-OX1	FLAVIN-MONOOXYGENASE GLUCOSINOLATE S-OXYGENASE 1 (FMO GS-OX1)	belongs to the flavin-monooxygenase (FMO) family, encodes a glucosinolate S-oxygenase that catalyzes the conversion of methylthioalkyl glucosinolates to methylsulfinylalkyl glucosinolates
1.77922	2.74675	AT1G61450			CAP-gly domain linker;(source:Araport11)
2.73913	2.73913	AT2G34220		MATERNAL EFFECT EMBRYO ARREST 20 (MEE20)	ubiquitin carboxyl-terminal hydrolase-like protein, putative (DUF627 and DUF629);(source:Araport11)
3.42857	2.7381	AT1G67180			zinc finger (C3HC4-type RING finger) family protein / BRCT domain-containing protein;(source:Araport11)
3.38235	2.73529	AT5G55340			MBOAT (membrane bound O-acyl transferase) family protein;(source:Araport11)
1.57265	2.73504	AT1G17600	SOC3	(SOC3)	SOC3 is a TIR-NB-leucine-rich repeat (TNL) protein.Mutants suppress loss of chs2 phenotype of auto-activation of immunity. When the TIR domain of SOC3 interacts with CHS2 the binding results in temperature activation of cell death, the suppressors inhibit this interaction.
2.70732	2.73171	AT1G07743			Natural antisense transcript overlaps with AT1G51402;(source:Araport11)
6.49383	2.7284	AT1G49620	ICK5	KIP-RELATED PROTEIN 7 (KRP7); (ATKRP7); (ICK5); (ICN6)	Kip-related protein (KRP) gene, encodes CDK (cyclin-dependent kinase) inhibitor (CKI), negative regulator of cell division. A member of seven KRP genes found in Arabidopsis thaliana. Differential expression patterns for distinct KRPs were revealed by in situ hybridization. Binds to D type cyclins and may inhibit cell cycle.
1.63636	2.72727	AT3G03605			None;(source:Araport11)
0.909091	2.72727	AT2G04065			Natural antisense transcript overlaps with AT2G01630;(source:Araport11)
1.66667	2.72222	AT1G76952		INFLORESCENCE DEFICIENT IN ABSCISSION (IDA)-LIKE 5 (IDL5)	Similar to Inflorescence deficient in abscission (IDA). Involved in floral organ abscission.
2.375	2.71528	AT2G44570		GLYCOSYL HYDROLASE 9B12 (GH9B12);GLYCOSYL HYDROLASE 9B12 (AtGH9B12)	glycosyl hydrolase 9B12;(source:Araport11)
2.54286	2.71429	AT3G13210			crooked neck protein, putative / cell cycle protein;(source:Araport11)
1.3	2.70909	AT3G28857		PACLOBUTRAZOL RESISTANCE 5 (PRE5)	Encodes a atypical member of the bHLH (basic helix-loop-helix) family transcriptional factors.
2.15385	2.70192	AT5G08640		FLAVONOL SYNTHASE (FLS);FLAVONOL SYNTHASE 1 (FLS1); (ATFLS1)	Encodes a flavonol synthase that catalyzes formation of flavonols from dihydroflavonols. Co-expressed with CHI and CHS (qRT-PCR).
2.66667	2.7	AT1G04330	PH2	(PH2)	A proline/serine rich protein of unknown function. It interacts with defense related MAP kinase MPK6 and others. May be involved in signaling during defense or stress response.
1.37269	2.69373	AT4G12430		TREHALOSE-6-PHOSPHATE PHOSPHATASE F (TPPF)	Haloacid dehalogenase-like hydrolase (HAD) superfamily protein;(source:Araport11)
3.56	2.69333	AT5G05365		HEAVY METAL ASSOCIATED PROTEIN 44 (ATHMP44)	Heavy metal transport/detoxification superfamily protein;(source:Araport11)
0.8776	2.69231	AT5G52910		TIMELESS (ATIM)	homolog of Drosophila timeless
2.4	2.68889	AT3G17730		NAC DOMAIN CONTAINING PROTEIN 57 (NAC057);NAC DOMAIN CONTAINING PROTEIN 57 (anac057)	NAC domain containing protein 57;(source:Araport11)
2.81343	2.68657	AT5G01910			myelin transcription factor;(source:Araport11)
1.64	2.68	AT4G13210			Pectin lyase-like superfamily protein;(source:Araport11)
2.2381	2.67857	AT5G25580		DDT-RELATED PROTEIN5 (DDR5)	hypothetical protein;(source:Araport11)
2.6129	2.67742	AT1G67760			TCP-1/cpn60 chaperonin family protein;(source:Araport11)
1.85	2.675	AT4G39410		ARABIDOPSIS THALIANA WRKY DNA-BINDING PROTEIN 13 (ATWRKY13);WRKY DNA-BINDING PROTEIN 13 (WRKY13)	Encodes a member of the Group II-c WRKY Transcription Factor family that is involved in stem development and has been shown to directly bind to the promoter of NST2. WRKY13 binds to the promoter of DCD to upregulate its expression and hydrogen sulfide production to enhance plant cadmium tolerance. Mutants show a weak stem phenotype and show decreased expression of lignin-synthesis-related genes.
2.71429	2.67347	AT5G02220		SIAMESE-RELATED 4 (SMR4)	cyclin-dependent kinase inhibitor;(source:Araport11)
2.72917	2.66667	AT5G40960			transmembrane protein, putative (DUF 3339);(source:Araport11)
1.92131	2.65643	AT4G17085			Putative membrane lipoprotein;(source:Araport11)
2.41331	2.65499	AT1G18370		ARABIDOPSIS NPK1-ACTIVATING KINESIN 1 (ATNACK1);NPK1-ACTIVATING KINESIN 1 (NACK1);HINKEL (HIK)	Encodes a kinesin HINKEL. Required for cytokinesis in pollen. Mutant has cytokinesis defects; seedling lethal.
2.72727	2.63636	AT4G31620		REPRODUCTIVE MERISTEM 36 (REM36)	Transcriptional Factor B3 family protein
1.48889	2.63333	AT1G33930		IMMUNE ASSOCIATED NUCLEOTIDE BINDING 6 (IAN6)	One of a cluster of paralogs (IAN2-6) that are associated with variation in heat tolerance.
0.996364	2.63273	AT5G41761			hypothetical protein;(source:Araport11)
4.57143	2.62857	AT2G05765			snoRNA;(source:Araport11)
2.66667	2.625	AT1G55010		PLANT DEFENSIN 1.5 (PDF1.5)	Predicted to encode a PR (pathogenesis-related) protein. Belongs to the plant defensin (PDF) family with the following members: At1g75830/PDF1.1, At5g44420/PDF1.2a, At2g26020/PDF1.2b, At5g44430/PDF1.2c, At2g26010/PDF1.3, At1g19610/PDF1.4, At1g55010/PDF1.5, At2g02120/PDF2.1, At2g02100/PDF2.2, At2g02130/PDF2.3, At1g61070/PDF2.4, At5g63660/PDF2.5, At2g02140/PDF2.6, At5g38330/PDF3.1 and At4g30070/PDF…
2.51282	2.62393	AT1G04760		VESICLE-ASSOCIATED MEMBRANE PROTEIN 726 (ATVAMP726);VESICLE-ASSOCIATED MEMBRANE PROTEIN 726 (VAMP726)	member of Synaptobrevin -like protein family
4.49466	2.61922	AT5G17450		HEAVY METAL ASSOCIATED ISOPRENYLATED PLANT PROTEIN 21 (HIPP21);HEAVY METAL ASSOCIATED PROTEIN 45 (ATHMP45)	Heavy metal transport/detoxification superfamily protein;(source:Araport11)
2.14286	2.61905	AT1G05370			Sec14p-like phosphatidylinositol transfer family protein;(source:Araport11)
2.52381	2.61905	AT5G24510			60S acidic ribosomal protein family;(source:Araport11)
4.06349	2.61905	AT1G65484	STMP3	(STMP3)	Secreted peptide which functions in plant growth and pathogen defense.
3.89179	2.61567	AT1G62560	FMO GS-OX3	FLAVIN-MONOOXYGENASE GLUCOSINOLATE S-OXYGENASE 3 (FMO GS-OX3)	belongs to the flavin-monooxygenase (FMO) family, encodes a glucosinolate S-oxygenase that catalyzes the conversion of methylthioalkyl glucosinolates to methylsulfinylalkyl glucosinolates The mRNA is cell-to-cell mobile.
1.65385	2.61538	AT1G09495			novel transcribed region;(source:Araport11)
1.23077	2.61538	AT4G06770			Natural antisense transcript overlaps with AT4G18370;(source:Araport11)
3.24074	2.61111	AT3G14510		ISOPRENYL DIPHOSPHATE SYNTHASE5 (IDS5)	Polyprenyl synthetase family protein;(source:Araport11)
2.44444	2.61111	AT3G53235			hypothetical protein;(source:Araport11)
2.33594	2.60938	AT2G42110			hypothetical protein;(source:Araport11)
2.3913	2.6087	AT1G06173			None;(source:Araport11)
1.74499	2.60801	AT1G11850			transmembrane protein;(source:Araport11)
1.81132	2.60377	AT3G20475		MUTS-HOMOLOGUE 5 (MSH5);MUTS-HOMOLOGUE 5 (ATMSH5)	Encodes MSH5, a homologue of the MutS-homolog family of genes required for normal levels of recombination in budding yeast, mouse and Caenorhabditis elegans. Involved in meiotic recombination. Required for the formation of Class I interference-sensitive crossovers. Transcripts of AtMSH5 are specific to reproductive tissues and expression of the protein is abundant during prophase I of meiosis. In…
1.8595	2.60331	AT5G38780			SABATH methyltransferase.
1.93333	2.6	AT5G63580		(ATFLS2);FLAVONOL SYNTHASE 2 (FLS2)	encodes a protein whose sequence is similar to flavonol synthase
1.36364	2.59091	AT3G52160		3-KETOACYL-COA SYNTHASE 15 (KCS15)	Encodes KCS15, a member of the 3-ketoacyl-CoA synthase family involved in the biosynthesis of VLCFA (very long chain fatty acids).
1.56877	2.58736	AT1G60060			Serine/threonine-protein kinase WNK (With No Lysine)-like protein;(source:Araport11)
1.84326	2.58669	AT4G14020			Rapid alkalinization factor (RALF) family protein;(source:Araport11)
3.26667	2.58519	AT5G67110		ALCATRAZ (ALC)	encodes a myc/bHLH transcription factor-like protein. Gene product is involved in fruit dehiscence. Mutant siliques fail to dehisce.
1.875	2.58333	AT3G02390			hypothetical protein;(source:Araport11)
5.58333	2.58333	AT4G12200			transposable_element_gene;(source:Araport11);similar to polyprotein [Oryza sativa] (GB:BAB03249.1);(source:TAIR10)
4.91667	2.58333	AT2G26010		PLANT DEFENSIN 1.3 (PDF1.3)	Predicted to encode a PR (pathogenesis-related) protein. Belongs to the plant defensin (PDF) family with the following members: At1g75830/PDF1.1, At5g44420/PDF1.2a, At2g26020/PDF1.2b, At5g44430/PDF1.2c, At2g26010/PDF1.3, At1g19610/PDF1.4, At1g55010/PDF1.5, At2g02120/PDF2.1, At2g02100/PDF2.2, At2g02130/PDF2.3, At1g61070/PDF2.4, At5g63660/PDF2.5, At2g02140/PDF2.6, At5g38330/PDF3.1 and At4g30070/PDF…
1.8	2.58333	AT2G19920			RNA-dependent RNA polymerase family protein;(source:Araport11)
2	2.57895	AT2G22905			Expressed protein;(source:Araport11)
2.84579	2.5771	AT4G01600			GRAM domain family protein;(source:Araport11)
2.59322	2.57627	AT5G09570	AT12CYS-2	(AT12CYS-2)	Twin CX9C domain protein. Induced by low phosphate or iron, drought and heat stress. Loss of both At12cys-1 and At12cys-2 lead to enhanced tolerance to drought and light stress and increased anti-oxidant capacity.
1.38095	2.57143	AT1G08865			novel transcribed region;(source:Araport11)
1	2.57143	AT1G08165			hypothetical protein;(source:Araport11)
3.55515	2.56973	AT1G78370	GSTU20	GLUTATHIONE S-TRANSFERASE TAU 20 (GSTU20);GLUTATHIONE S-TRANSFERASE TAU 20 (ATGSTU20)	Encodes glutathione transferase belonging to the tau class of GSTs. Naming convention according to Wagner et al. (2002).
1.56757	2.56757	AT2G34540			hypothetical protein;(source:Araport11)
1.90244	2.56707	AT1G49700			Plant protein 1589 of unknown function;(source:Araport11)
1.97044	2.5665	AT4G25270		ORGANELLE TRANSCRIPT PROCESSING 70 (OTP70)	Encodes OTP70, a pentatricopeptide repeat protein of the E subgroup involved in splicing of the plastid transcript rpoC1.
0.897942	2.56346	AT2G21210		SMALL AUXIN UPREGULATED RNA 6 (SAUR6)	Putative auxin-regulated protein whose expression is downregulated in response to chitin oligomers.
1.30481	2.5615	AT4G30975			None;(source:Araport11)
1.65785	2.56125	AT4G22513			Encodes a Protease inhibitor/seed storage/LTP family protein
1.82493	2.55764	AT1G06360			Fatty acid desaturase family protein;(source:Araport11)
1.77778	2.55556	AT5G01055			None;(source:Araport11)
1.26549	2.55457	AT2G39690			ternary complex factor MIP1 leucine-zipper protein (Protein of unknown function, DUF547);(source:Araport11)
2.1	2.55	AT2G32830		PHOSPHATE TRANSPORTER 1;5 (PHT1;5);PHOSPHATE TRANSPORTER 5 (PHT5)	Encodes Pht1;5, a member of the Pht1 family of phosphate transporters which include: Pht1;1/At5g43350, Pht1;2/At5g43370, Pht1;3/At5g43360, Pht1;4/At2g38940, Pht1;5/At2g32830, Pht1;6/At5g43340, Pht1;7/At3g54700, Pht1;8/At1g20860, Pht1;9/At1g76430 (Plant Journal 2002, 31:341).
0.836257	2.54776	AT4G35720			DUF241 domain protein, putative (DUF241);(source:Araport11)
1.45455	2.54545	AT5G01070			RING/FYVE/PHD zinc finger superfamily protein;(source:Araport11)
2.51515	2.54545	AT1G05143			Natural antisense transcript overlaps with AT1G15030;(source:Araport11)
2.86	2.54	AT4G29880		PLANT INTRACELLULAR RAS GROUP-RELATED LRR 7 (PIRL7)	Encodes PIRL7, a member of the Plant Intracellular Ras-group-related LRRs (Leucine rich repeat proteins). PIRLs are a distinct, plant-specific class of intracellular LRRs that likely mediate protein interactions, possibly in the context of signal transduction.
2.83146	2.53933	AT3G48540			Cytidine/deoxycytidylate deaminase family protein;(source:Araport11)
3.23077	2.53846	AT3G59270			FBD-like domain family protein;(source:Araport11)
1.61538	2.53846	AT1G58460			hypothetical protein;(source:Araport11)
1.13793	2.53448	AT3G53232		DEVIL 20 (DVL20);ROTUNDIFOLIA LIKE 1 (RTFL1)	ROTUNDIFOLIA like 1;(source:Araport11)
1.50093	2.53358	AT3G29030	EXPA5	ARABIDOPSIS THALIANA EXPANSIN 5 (ATEXP5);ARABIDOPSIS THALIANA EXPANSIN A5 (ATEXPA5); (ATHEXP ALPHA 1.4);EXPANSIN 5 (EXP5);EXPANSIN A5 (EXPA5)	Encodes an expansin. Naming convention from the Expansin Working Group (Kende et al, 2004. Plant Mol Bio)
1.64706	2.52941	AT4G02170			cotton fiber protein;(source:Araport11)
6.17647	2.52941	AT5G52710			Copper transport protein family;(source:Araport11)
2.38286	2.52857	AT5G56120			RNA polymerase II elongation factor;(source:Araport11)
1.4386	2.52632	AT1G29195			PADRE protein up-regulated after infection by S. sclerotiorum.
2.86957	2.52174	AT3G58770			hypothetical protein;(source:Araport11)
2.2716	2.51852	AT5G36800			transmembrane protein;(source:Araport11)
1.96296	2.51852	AT3G00460			novel transcribed region;(source:Araport11)
1.48276	2.51724	AT1G20680			transport/golgi organization-like protein (DUF833);(source:Araport11)
2.88082	2.51507	AT3G25570		S-ADENOSYLMETHIONINE DECARBOXYLASE 3 (SAMDC3)	S-adenosylmethionine decarboxylase family member.
2.28517	2.51331	AT3G55660	ROPGEF6	ROP (RHO OF PLANTS) GUANINE NUCLEOTIDE EXCHANGE FACTOR 6 (ROPGEF6); (ATROPGEF6)	Encodes a member of KPP-like gene family, homolog of KPP (kinase partner protein) gene in tomato. Also a member of the RopGEF (guanine nucleotide exchange factor) family, containing the novel PRONE domain (plant-specific Rop nucleotide exchanger), which is exclusively active towards members of the Rop subfamily.
1.67647	2.5098	AT5G35525			PLAC8 family protein;(source:Araport11)
1.55224	2.50746	AT4G24860			P-loop containing nucleoside triphosphate hydrolases superfamily protein;(source:Araport11)
2.27368	2.50526	AT4G35620	CYCB2-2	CYCLIN B2;2 (CYCB2;2)	Cyclin B2;(source:Araport11)
2.1875	2.5	AT1G14455			hypothetical protein;(source:Araport11)
1.6875	2.5	AT4G11700			hypothetical protein (DUF626);(source:Araport11)
1.8	2.5	AT5G66455			pseudogene of pentatricopeptide (PPR) repeat-containing protein
1.25	2.5	AT3G08655			Natural antisense transcript overlaps with AT3G56450;(source:Araport11)
4.01064	2.5	AT2G24110			pseudogene of ribosomal protein S11-beta;(source:Araport11)
2.95455	2.5	AT1G67370	ASY1	(ATASY1);ASYNAPTIC 1 (ASY1)	Meiotic asynaptic mutant 1 (ASY1). ASY1 protein is initially distributed as numerous foci throughout the chromatin. During early G2, the foci are juxtaposed to the nascent chromosome axes to form a continuous axis associated signal.
3.16667	2.5	AT2G08485			None;(source:Araport11)
1.78333	2.5	AT4G08570	HIPP24	(HIPP24);HEAVY METAL ASSOCIATED PROTEIN 33 (ATHMP33)	Heavy metal transport/detoxification superfamily protein;(source:Araport11)
1.7	2.5	AT5G62380	NAC101	NAC-DOMAIN PROTEIN 101 (ANAC101);VASCULAR-RELATED NAC-DOMAIN 6 (VND6);NAC-DOMAIN PROTEIN 101 (NAC101)	Encodes a NAC-domain transcription factor involved in xylem formation. Induces transdifferentiation of various cells into metaxylem vessel elements. Located in the nucleus. Expression induced in the presence of auxin, cytokinin and brassinosteroids.
0.583333	2.5	AT2G42388			other_RNA;(source:Araport11)
2.30769	2.5	AT5G40570			Surfeit locus protein 2 (SURF2);(source:Araport11)
2.55556	2.5	AT3G16070			LOW protein: ATP-dependent RNA helicase-like protein;(source:Araport11)
0.666667	2.5	AT5G52390			PAR1 protein;(source:Araport11)

## Sheet: S7. GO term analysis, TAIR
Gene Ontology analysis of RNAseq data
Estradiol: Short treatment, downregulated genes (641)								Estradiol: Long treatment, downregulated genes (308)								Estradiol: Short treatment, upregulated genes (571)								Estradiol: Long treatment, upregulated genes (421)
GO biological process								GO biological process								GO biological process								GO biological process
Analysis Type:	PANTHER Overrepresentation Test (Released 20210224)							Analysis Type:	PANTHER Overrepresentation Test (Released 20210224)							Analysis Type:	PANTHER Overrepresentation Test (Released 20210224)							Analysis Type:	PANTHER Overrepresentation Test (Released 20210224)
Annotation Version and Release Date:	GO Ontology database DOI: 10.5281/zenodo.4495804 Released 2021-02-01							Annotation Version and Release Date:	GO Ontology database DOI: 10.5281/zenodo.4495804 Released 2021-02-01							Annotation Version and Release Date:	GO Ontology database DOI: 10.5281/zenodo.4495804 Released 2021-02-01							Annotation Version and Release Date:	GO Ontology database DOI: 10.5281/zenodo.4495804 Released 2021-02-01
Analyzed List:	upload_1 (Arabidopsis thaliana)							Analyzed List:	upload_1 (Arabidopsis thaliana)							Analyzed List:	upload_1 (Arabidopsis thaliana)							Analyzed List:	upload_1 (Arabidopsis thaliana)
Reference List:	Arabidopsis thaliana (all genes in database)							Reference List:	Arabidopsis thaliana (all genes in database)							Reference List:	Arabidopsis thaliana (all genes in database)							Reference List:	Arabidopsis thaliana (all genes in database)
Test Type:	FISHER							Test Type:	FISHER							Test Type:	FISHER							Test Type:	FISHER
Correction:	BONFERRONI							Correction:	BONFERRONI							Correction:	BONFERRONI							Correction:	BONFERRONI
Bonferroni count:	2839							Bonferroni count:	2839							Bonferroni count:	2839							Bonferroni count:	2839
GO biological process complete	Arabidopsis thaliana - REFLIST (27462)	upload_1 (442)	upload_1 (expected)	upload_1 (over/under)	upload_1 (fold Enrichment)	upload_1 (P-value)		GO biological process complete	Arabidopsis thaliana - REFLIST (27462)	upload_1 (207)	upload_1 (expected)	upload_1 (over/under)	upload_1 (fold Enrichment)	upload_1 (P-value)		GO biological process complete	Arabidopsis thaliana - REFLIST (27462)	upload_1 (324)	upload_1 (expected)	upload_1 (over/under)	upload_1 (fold Enrichment)	upload_1 (P-value)		GO biological process complete	Arabidopsis thaliana - REFLIST (27462)	upload_1 (207)	upload_1 (expected)	upload_1 (over/under)	upload_1 (fold Enrichment)	upload_1 (P-value)
cell-cell junction assembly (GO:0007043)	6	4	0.1	+	41.42	0.0343		aging (GO:0007568)	133	8	1	+	7.98	0.0329		cellular response to sulfur starvation (GO:0010438)	7	5	0.08	+	60.54	0.00044		stomatal complex development (GO:0010374)	55	7	0.41	+	16.88	0.00117
xyloglucan metabolic process (GO:0010411)	59	10	0.95	+	10.53	0.000377		cellular response to hypoxia (GO:0071456)	234	11	1.76	+	6.24	0.00741		S-glycoside biosynthetic process (GO:0016144)	39	12	0.46	+	26.08	1.55e-09		Unclassified (UNCLASSIFIED)	6258	57	47.17	+	1.21	0
trichoblast differentiation (GO:0010054)	125	19	2.01	+	9.44	4.76e-09		cellular response to decreased oxygen levels (GO:0036294)	236	11	1.78	+	6.18	0.00802		glucosinolate biosynthetic process (GO:0019761)	39	12	0.46	+	26.08	1.55e-09
root hair cell differentiation (GO:0048765)	121	17	1.95	+	8.73	2.16e-07		cellular response to oxygen levels (GO:0071453)	237	11	1.79	+	6.16	0.00834		glycosinolate biosynthetic process (GO:0019758)	39	12	0.46	+	26.08	1.55e-09
trichoblast maturation (GO:0048764)	121	17	1.95	+	8.73	2.16e-07		secondary metabolic process (GO:0019748)	303	13	2.28	+	5.69	0.00241		sulfate assimilation (GO:0000103)	22	5	0.26	+	19.26	0.0388
cell maturation (GO:0048469)	122	17	1.96	+	8.66	2.43e-07		response to hypoxia (GO:0001666)	260	11	1.96	+	5.61	0.0194		glycosyl compound biosynthetic process (GO:1901659)	59	13	0.7	+	18.68	6.29e-09
root epidermal cell differentiation (GO:0010053)	140	19	2.25	+	8.43	2.84e-08		response to decreased oxygen levels (GO:0036293)	264	11	1.99	+	5.53	0.0223		response to insect (GO:0009625)	32	6	0.38	+	15.89	0.0137
root hair cell development (GO:0080147)	98	12	1.58	+	7.61	0.000529		response to oxygen levels (GO:0070482)	266	11	2.01	+	5.49	0.0239		homologous chromosome pairing at meiosis (GO:0007129)	33	6	0.39	+	15.41	0.0161
hemicellulose metabolic process (GO:0010410)	110	13	1.77	+	7.34	0.000239		cellular response to stimulus (GO:0051716)	2478	39	18.68	+	2.09	0.0394		homologous chromosome segregation (GO:0045143)	37	6	0.44	+	13.74	0.0289
anatomical structure maturation (GO:0071695)	186	21	2.99	+	7.01	5.5e-08		response to chemical (GO:0042221)	2687	42	20.25	+	2.07	0.0163		toxin metabolic process (GO:0009404)	59	9	0.7	+	12.93	0.000273
plant epidermal cell differentiation (GO:0090627)	171	19	2.75	+	6.9	6.46e-07		response to stress (GO:0006950)	3114	48	23.47	+	2.04	0.00426		toxin catabolic process (GO:0009407)	46	7	0.54	+	12.9	0.00759
cell wall polysaccharide metabolic process (GO:0010383)	144	15	2.32	+	6.47	0.000113		response to stimulus (GO:0050896)	5533	81	41.71	+	1.94	1.46e-06		S-glycoside metabolic process (GO:0016143)	112	15	1.32	+	11.35	7.41e-08
developmental maturation (GO:0021700)	204	21	3.28	+	6.4	2.66e-07		Unclassified (UNCLASSIFIED)	6258	49	47.17	+	1.04	0		glucosinolate metabolic process (GO:0019760)	112	15	1.32	+	11.35	7.41e-08
cell wall macromolecule metabolic process (GO:0044036)	171	15	2.75	+	5.45	0.000892										glycosinolate metabolic process (GO:0019757)	112	15	1.32	+	11.35	7.41e-08
root morphogenesis (GO:0010015)	301	26	4.84	+	5.37	5.75e-08										detoxification (GO:0098754)	100	13	1.18	+	11.02	2.22e-06
cell wall biogenesis (GO:0042546)	238	20	3.83	+	5.22	1.9e-05										chromosome organization involved in meiotic cell cycle (GO:0070192)	55	7	0.65	+	10.79	0.0221
plant epidermis development (GO:0090558)	266	22	4.28	+	5.14	4.38e-06										sulfur compound biosynthetic process (GO:0044272)	141	17	1.66	+	10.22	1.58e-08
isoprenoid metabolic process (GO:0006720)	191	15	3.07	+	4.88	0.00328										meiotic chromosome segregation (GO:0045132)	63	7	0.74	+	9.42	0.0498
cell wall organization (GO:0071555)	279	21	4.49	+	4.68	4.82e-05										response to toxic substance (GO:0009636)	120	13	1.42	+	9.18	1.68e-05
cell wall modification (GO:0042545)	173	13	2.78	+	4.67	0.0263										secondary metabolite biosynthetic process (GO:0044550)	144	15	1.7	+	8.83	1.84e-06
cell wall organization or biogenesis (GO:0071554)	510	38	8.21	+	4.63	9.07e-11										glycosyl compound metabolic process (GO:1901657)	184	17	2.17	+	7.83	7.35e-07
cell development (GO:0048468)	318	22	5.12	+	4.3	9.03e-05										secondary metabolic process (GO:0019748)	303	25	3.57	+	6.99	4.35e-10
external encapsulating structure organization (GO:0045229)	331	22	5.33	+	4.13	0.000175										sulfur compound metabolic process (GO:0006790)	394	31	4.65	+	6.67	1.57e-12
plant-type cell wall organization or biogenesis (GO:0071669)	267	17	4.3	+	3.96	0.00959										response to chemical (GO:0042221)	2687	59	31.7	+	1.86	0.0101
cellular polysaccharide metabolic process (GO:0044264)	269	17	4.33	+	3.93	0.0105										response to stress (GO:0006950)	3114	68	36.74	+	1.85	0.00186
plant organ morphogenesis (GO:1905392)	444	27	7.15	+	3.78	3.23e-05										regulation of biosynthetic process (GO:0009889)	2494	54	29.42	+	1.84	0.0463
polysaccharide metabolic process (GO:0005976)	417	25	6.71	+	3.72	0.000147										response to stimulus (GO:0050896)	5533	101	65.28	+	1.55	0.0107
response to acid chemical (GO:0001101)	400	23	6.44	+	3.57	0.00101										Unclassified (UNCLASSIFIED)	6258	82	73.83	+	1.11	0
response to water (GO:0009415)	368	21	5.92	+	3.55	0.00367
growth (GO:0040007)	442	25	7.11	+	3.51	0.00042
root development (GO:0048364)	534	30	8.59	+	3.49	2.71e-05
root system development (GO:0022622)	536	30	8.63	+	3.48	2.94e-05
developmental growth (GO:0048589)	384	21	6.18	+	3.4	0.00693
response to oxidative stress (GO:0006979)	458	25	7.37	+	3.39	0.00079
cell growth (GO:0016049)	385	21	6.2	+	3.39	0.0072
developmental growth involved in morphogenesis (GO:0060560)	334	18	5.38	+	3.35	0.0435
response to water deprivation (GO:0009414)	359	19	5.78	+	3.29	0.0323
cell differentiation (GO:0030154)	612	27	9.85	+	2.74	0.013
plant organ development (GO:0099402)	1044	42	16.8	+	2.5	0.000378
lipid metabolic process (GO:0006629)	854	33	13.75	+	2.4	0.019
response to endogenous stimulus (GO:0009719)	1276	45	20.54	+	2.19	0.00621
response to hormone (GO:0009725)	1246	43	20.05	+	2.14	0.015
response to oxygen-containing compound (GO:1901700)	1514	51	24.37	+	2.09	0.00307
response to organic substance (GO:0010033)	1712	55	27.55	+	2	0.00466
response to chemical (GO:0042221)	2687	73	43.25	+	1.69	0.0351
response to stress (GO:0006950)	3114	84	50.12	+	1.68	0.0102
response to stimulus (GO:0050896)	5533	136	89.05	+	1.53	0.000505
Unclassified (UNCLASSIFIED)	6258	102	100.72	+	1.01	0
nitrogen compound metabolic process (GO:0006807)	6100	59	98.18	-	0.6	0.00953
cellular aromatic compound metabolic process (GO:0006725)	2490	13	40.08	-	0.32	0.00157
heterocycle metabolic process (GO:0046483)	2356	9	37.92	-	0.24	5.86e-05
cellular nitrogen compound metabolic process (GO:0034641)	2861	7	46.05	-	0.15	1.02e-09
nucleobase-containing compound metabolic process (GO:0006139)	2074	3	33.38	-	0.09	4.2e-08
RNA metabolic process (GO:0016070)	1291	1	20.78	-	0.05	9.09e-05
gene expression (GO:0010467)	1598	1	25.72	-	0.04	5e-07
nucleic acid metabolic process (GO:0090304)	1698	1	27.33	-	0.04	9.92e-08
GO molecular function								GO molecular function								GO molecular function								GO molecular function
Analysis Type:	PANTHER Overrepresentation Test (Released 20210224)							Analysis Type:	PANTHER Overrepresentation Test (Released 20210224)							Analysis Type:	PANTHER Overrepresentation Test (Released 20210224)							Analysis Type:	PANTHER Overrepresentation Test (Released 20210224)
Annotation Version and Release Date:	GO Ontology database DOI: 10.5281/zenodo.4495804 Released 2021-02-01							Annotation Version and Release Date:	GO Ontology database DOI: 10.5281/zenodo.4495804 Released 2021-02-01							Annotation Version and Release Date:	GO Ontology database DOI: 10.5281/zenodo.4495804 Released 2021-02-01							Annotation Version and Release Date:	GO Ontology database DOI: 10.5281/zenodo.4495804 Released 2021-02-01
Analyzed List:	upload_1 (Arabidopsis thaliana)							Analyzed List:	upload_1 (Arabidopsis thaliana)							Analyzed List:	upload_1 (Arabidopsis thaliana)							Analyzed List:	upload_1 (Arabidopsis thaliana)
Reference List:	Arabidopsis thaliana (all genes in database)							Reference List:	Arabidopsis thaliana (all genes in database)							Reference List:	Arabidopsis thaliana (all genes in database)							Reference List:	Arabidopsis thaliana (all genes in database)
Test Type:	FISHER							Test Type:	FISHER							Test Type:	FISHER							Test Type:	FISHER
Correction:	BONFERRONI							Correction:	BONFERRONI							Correction:	BONFERRONI							Correction:	BONFERRONI
Bonferroni count:	1768							Bonferroni count:	1768							Bonferroni count:	1768							Bonferroni count:	1768
GO molecular function complete	Arabidopsis thaliana - REFLIST (27462)	upload_1 (442)	upload_1 (expected)	upload_1 (over/under)	upload_1 (fold Enrichment)	upload_1 (P-value)		GO molecular function complete	Arabidopsis thaliana - REFLIST (27462)	upload_1 (207)	upload_1 (expected)	upload_1 (over/under)	upload_1 (fold Enrichment)	upload_1 (P-value)		GO molecular function complete	Arabidopsis thaliana - REFLIST (27462)	upload_1 (324)	upload_1 (expected)	upload_1 (over/under)	upload_1 (fold Enrichment)	upload_1 (P-value)		GO molecular function complete	Arabidopsis thaliana - REFLIST (27462)	upload_1 (207)	upload_1 (expected)	upload_1 (over/under)	upload_1 (fold Enrichment)	upload_1 (P-value)
oxidoreductase activity, acting on metal ions, NAD or NADP as acceptor (GO:0016723)	8	4	0.13	+	31.07	0.0491		catalytic activity (GO:0003824)	8372	95	63.11	+	1.51	0.00803		glutathione transferase activity (GO:0004364)	59	7	0.7	+	10.06	0.021		Unclassified (UNCLASSIFIED)	6051	55	45.61	+	1.21	0
ferric-chelate reductase activity (GO:0000293)	8	4	0.13	+	31.07	0.0491		Unclassified (UNCLASSIFIED)	6051	40	45.61	-	0.88	0		DNA-binding transcription factor activity (GO:0003700)	1647	45	19.43	+	2.32	0.000422
xyloglucan:xyloglucosyl transferase activity (GO:0016762)	32	7	0.52	+	13.59	0.00419										transcription regulator activity (GO:0140110)	1791	46	21.13	+	2.18	0.00232
peroxidase activity (GO:0004601)	77	13	1.24	+	10.49	3.19e-06										Unclassified (UNCLASSIFIED)	6051	82	71.39	+	1.15	0
oxidoreductase activity, acting on peroxide as acceptor (GO:0016684)	83	14	1.34	+	10.48	7.63e-07
antioxidant activity (GO:0016209)	106	14	1.71	+	8.21	1.31e-05
heme binding (GO:0020037)	372	35	5.99	+	5.85	9.9e-13
tetrapyrrole binding (GO:0046906)	402	36	6.47	+	5.56	1.54e-12
glucosyltransferase activity (GO:0046527)	190	13	3.06	+	4.25	0.0416
monooxygenase activity (GO:0004497)	222	14	3.57	+	3.92	0.0479
oxidoreductase activity, acting on paired donors, with incorporation or reduction of molecular oxygen (GO:0016705)	390	23	6.28	+	3.66	0.000414
transferase activity, transferring hexosyl groups (GO:0016758)	351	20	5.65	+	3.54	0.00417
transferase activity, transferring glycosyl groups (GO:0016757)	603	27	9.71	+	2.78	0.00623
oxidoreductase activity (GO:0016491)	1410	58	22.69	+	2.56	3.25e-07
catalytic activity (GO:0003824)	8372	181	134.75	+	1.34	0.00764
Unclassified (UNCLASSIFIED)	6051	78	97.39	-	0.8	0
GO cellular component								GO cellular component								GO cellular component								GO cellular component
Analysis Type:	PANTHER Overrepresentation Test (Released 20210224)							Analysis Type:	PANTHER Overrepresentation Test (Released 20210224)							Analysis Type:	PANTHER Overrepresentation Test (Released 20210224)							Analysis Type:	PANTHER Overrepresentation Test (Released 20210224)
Annotation Version and Release Date:	GO Ontology database DOI: 10.5281/zenodo.4495804 Released 2021-02-01							Annotation Version and Release Date:	GO Ontology database DOI: 10.5281/zenodo.4495804 Released 2021-02-01							Annotation Version and Release Date:	GO Ontology database DOI: 10.5281/zenodo.4495804 Released 2021-02-01							Annotation Version and Release Date:	GO Ontology database DOI: 10.5281/zenodo.4495804 Released 2021-02-01
Analyzed List:	upload_1 (Arabidopsis thaliana)							Analyzed List:	upload_1 (Arabidopsis thaliana)							Analyzed List:	upload_1 (Arabidopsis thaliana)							Analyzed List:	upload_1 (Arabidopsis thaliana)
Reference List:	Arabidopsis thaliana (all genes in database)							Reference List:	Arabidopsis thaliana (all genes in database)							Reference List:	Arabidopsis thaliana (all genes in database)							Reference List:	Arabidopsis thaliana (all genes in database)
Test Type:	FISHER							Test Type:	FISHER							Test Type:	FISHER							Test Type:	FISHER
Correction:	BONFERRONI							Correction:	BONFERRONI							Correction:	BONFERRONI							Correction:	BONFERRONI
Bonferroni count:	671							Bonferroni count:	671							Bonferroni count:	671							Bonferroni count:	671
GO cellular component complete	Arabidopsis thaliana - REFLIST (27462)	upload_1 (442)	upload_1 (expected)	upload_1 (over/under)	upload_1 (fold Enrichment)	upload_1 (P-value)		GO cellular component complete	Arabidopsis thaliana - REFLIST (27462)	upload_1 (207)	upload_1 (expected)	upload_1 (over/under)	upload_1 (fold Enrichment)	upload_1 (P-value)		GO cellular component complete	Arabidopsis thaliana - REFLIST (27462)	upload_1 (324)	upload_1 (expected)	upload_1 (over/under)	upload_1 (fold Enrichment)	upload_1 (P-value)		GO cellular component complete	Arabidopsis thaliana - REFLIST (27462)	upload_1 (207)	upload_1 (expected)	upload_1 (over/under)	upload_1 (fold Enrichment)	upload_1 (P-value)
Casparian strip (GO:0048226)	16	6	0.26	+	23.3	0.000617		plant-type cell wall (GO:0009505)	234	11	1.76	+	6.24	0.00175		condensed nuclear chromosome (GO:0000794)	29	5	0.34	+	14.61	0.0296		Unclassified (UNCLASSIFIED)	3011	39	22.7	+	1.72	0
secondary cell wall (GO:0009531)	21	6	0.34	+	17.75	0.00229		external encapsulating structure (GO:0030312)	584	19	4.4	+	4.32	0.000107		condensed chromosome (GO:0000793)	54	6	0.64	+	9.42	0.0475		membrane-bounded organelle (GO:0043227)	18729	109	141.17	-	0.77	0.00275
plant-type cell wall (GO:0009505)	234	24	3.77	+	6.37	3.03e-09		cell wall (GO:0005618)	566	18	4.27	+	4.22	0.000317		Unclassified (UNCLASSIFIED)	3011	54	35.52	+	1.52	0		organelle (GO:0043226)	18925	110	142.65	-	0.77	0.00167
external encapsulating structure (GO:0030312)	584	36	9.4	+	3.83	1.79e-08		extracellular region (GO:0005576)	3044	50	22.94	+	2.18	0.000112		mitochondrion (GO:0005739)	4008	23	47.29	-	0.49	0.0315		intracellular membrane-bounded organelle (GO:0043231)	18568	107	139.96	-	0.76	0.00152
cell wall (GO:0005618)	566	34	9.11	+	3.73	1.24e-07		cell periphery (GO:0071944)	4013	56	30.25	+	1.85	0.00277										intracellular organelle (GO:0043229)	18775	108	141.52	-	0.76	0.000901
extracellular region (GO:0005576)	3044	89	48.99	+	1.82	3.16e-05		Unclassified (UNCLASSIFIED)	3011	20	22.7	-	0.88	0
cell periphery (GO:0071944)	4013	107	64.59	+	1.66	0.000101		organelle (GO:0043226)	18925	114	142.65	-	0.8	0.0211
Unclassified (UNCLASSIFIED)	3011	55	48.46	+	1.13	0		membrane-bounded organelle (GO:0043227)	18729	112	141.17	-	0.79	0.0168
intracellular anatomical structure (GO:0005622)	20601	277	331.57	-	0.84	9.3e-06		intracellular organelle (GO:0043229)	18775	112	141.52	-	0.79	0.0157
organelle (GO:0043226)	18925	253	304.6	-	0.83	0.000235		intracellular membrane-bounded organelle (GO:0043231)	18568	110	139.96	-	0.79	0.0127
intracellular organelle (GO:0043229)	18775	250	302.18	-	0.83	0.000202		protein-containing complex (GO:0032991)	2948	2	22.22	-	0.09	2.99e-05
membrane-bounded organelle (GO:0043227)	18729	246	301.44	-	0.82	3.81e-05
intracellular membrane-bounded organelle (GO:0043231)	18568	242	298.85	-	0.81	1.83e-05
nucleus (GO:0005634)	10184	123	163.91	-	0.75	0.0366
mitochondrion (GO:0005739)	4008	31	64.51	-	0.48	0.00103
protein-containing complex (GO:0032991)	2948	4	47.45	-	0.08	8.62e-14

## Sheet: S8. Bruex et al., 2012
Table S8. Root hair core regulatory genes according to Bruex et al., 2012, and their transcript change upon ZFP3 overexpression.
AGI	Protein	Gene cluster	Fold change/Short ZFP3ox	Fold change/Long ZFP3ox	Gene Model Description
AT4G17970	ALMT12	cluster A	0.422348	1.53598	Anion transporter involved in stomatal closure. Gene has 3 splicing variants.
AT5G66590		cluster A	0.532784	0.816598	CAP (Cysteine-rich secretory proteins, Antigen 5, and Pathogenesis-related 1 protein) superfamily protein;(source:Araport11)
AT1G25450	KCS5, CER60	cluster A	0.787252	1.10192	Encodes KCS5, a member of the 3-ketoacyl-CoA synthase family involved in the biosynthesis of VLCFA (very long chain fatty acids).
AT3G54400		cluster A	0.829419	1.00234	Eukaryotic aspartyl protease family protein;(source:Araport11)
AT4G32460	BDX	cluster A	0.902183	1.68734	BDX is a DUF642 cell wall protein primarily expressed in vascular tissues of roots, leaves and embryos. Mutants show defects in seed and embryo development.
AT1G25460		cluster A	1	1.03704	NAD(P)-binding Rossmann-fold superfamily protein;(source:Araport11)
AT5G47550	CYS5	cluster A	1.02667	1.05807	Putative phytocystatin expressed in seedlings and induced by heat stress and abscisic acid. Overexpression increases germination rate and heat stress tolerance. CYS5 is a target of ABF1 and ABF3 transcriptional regulators which bind to its promoter.
AT4G22280		cluster A	1.13	0.904	F-box/RNI-like superfamily protein;(source:Araport11)
AT1G27950	LTPG1	cluster A	1.21842	1.40608	Encodes LTPG1, a lipid transfer protein with a predicted GPI (glycosylphosphatidylinositol)-anchor domain. Localized in the plasma membrane. Disruption of the LTPG1 gene causes alterations of cuticular lipid composition, but no significant changes on total wax and cutin monomer loads are seen. The mRNA is cell-to-cell mobile.
AT1G52400	BGLU18	cluster A	1.27654	1.36302	encodes a member of glycosyl hydrolase family 1, located in inducible ER bodies which were formed after wounding, required in inducible ER body formation The mRNA is cell-to-cell mobile.
AT1G26770	EXPA10	cluster A	1.5647	1.92971	Encodes an expansin. Naming convention from the Expansin Working Group (Kende et al, Plant Mol Bio). Involved in the formation of nematode-induced syncytia in roots of Arabidopsis thaliana.
AT1G72970	HTH	cluster A	1.67785	1.88157	Originally identified as a mutation that causes floral organs to fuse together. About 10-20% of mutants also have defects in ovules. Mutants have reduced fertility most likely as because of fusions that pistil emergence. The protein has similarity to the mandelonitrile lyase family of FAD containing oxidoreductases and is predicted to be secreted (SignalP).It is expressed in all tissue layers of …
AT2G26870	NPC2	cluster A	1.93884	1.22936	Non-specific phospholipase C2 involved in gametophyte development.
AT1G18250	LP-1	cluster A	2.17528	2.17024	encodes a thaumatin-like protein
AT3G19320		cluster B	0.442623	0.748634	Leucine-rich repeat (LRR) family protein;(source:Araport11)
AT1G66460		cluster B	0.52809	0.539326	Protein kinase superfamily protein;(source:Araport11)
AT1G29050	TBL38	cluster B	0.552239	1.14925	Encodes a member of the TBL (TRICHOME BIREFRINGENCE-LIKE) gene family containing a plant-specific DUF231 (domain of unknown function) domain. TBL gene family has 46 members, two of which (TBR/AT5G06700 and TBL3/AT5G01360) have been shown to be involved in the synthesis and deposition of secondary wall cellulose, presumably by influencing the esterification state of pectic polymers. A nomenclature…
AT1G10550	XTH33	cluster B	0.647554	0.513761	Encodes a membrane-localized protein that is predicted to function during cell wall modification.Overexpression of XTH33 results in abnormal cell morphology. It's expression is under epigenetic control by ATX1.
AT4G26320	AGP13	cluster B	0.707438	1.98017	arabinogalactan protein 13;(source:Araport11)
AT1G65310	XTH17	cluster B	0.914585	1.4021	Encodes a xyloglucan endotransglucosylase/hydrolase with only only the endotransglucosylase (XET; EC 2.4.1.207) activity towards xyloglucan and non-detectable endohydrolytic (XEH; EC 3.2.1.151) activity. Expressed in the mature or basal regions of both the main and lateral roots, but not in the tip of these roots where cell division occurs.
AT5G11020		cluster B	0.992548	0.988077	Protein kinase superfamily protein;(source:Araport11)
AT2G32280	VCC	cluster B	1.29676	1.33167	Encodes a member of a plant-specific gene family that is required for embryo provasculature development. The gene product regulates vascular network complexity and connectivity in cotyledons.
AT3G49220	PME34	cluster B	1.34306	1.4258	Plant invertase/pectin methylesterase inhibitor superfamily;(source:Araport11)
AT3G04940	CYSD1	cluster B	1.43396	1.54219	Encodes cysteine synthase CysD1.
AT3G61820		cluster B	1.66849	1.0188	Eukaryotic aspartyl protease family protein;(source:Araport11)
AT2G42060		cluster C	0.23895	0.520718	Cysteine/Histidine-rich C1 domain family protein;(source:Araport11)
AT3G16800	PP2C41,EGR3	cluster C	0.299619	0.77662	EGR3 functions as a negative regulator of plant growth with prominent effect on plant growth during drought stress, EGR3 regulates microtubule organization and likely affects additional cytoskeleton and trafficking processes along the plasma membrane.
AT5G02515		cluster C	0.476471	0.932353	Natural antisense transcript overlaps with AT5G16030;(source:Araport11)
AT5G63590	FLS3	cluster C	0.537705	0.772678	flavonol synthase 3;(source:Araport11)
AT2G35585		cluster C	0.541401	0.824841	cystic fibrosis transmembrane conductance regulator;(source:Araport11)
AT2G41380		cluster C	0.709904	0.976629	S-adenosyl-L-methionine-dependent methyltransferases superfamily protein;(source:Araport11)
AT2G24180	CYP71B6	cluster C	0.732162	0.770811	Encodes a cytochrome P450 monooxygenase that converts indole-3-acetonitrile to indole-3-aldehyde / indole-3-carboxylic acid and cyanide. The mRNA is cell-to-cell mobile.
AT4G17215		cluster C	0.732548	0.693563	Pollen Ole e 1 allergen and extensin family protein;(source:Araport11)
AT5G54840	SGP1	cluster C	0.995657	1.09121	Monomeric G protein. Expressed in the root quiescent center, flowers, and leaf guard cells and hydathodes.
AT3G01930		cluster C	1.16108	1.02488	Major facilitator superfamily protein;(source:Araport11)
AT5G45800	MEE62	cluster C	1.16854	0.966517	Leucine-rich repeat protein kinase family protein;(source:Araport11)
AT1G74100	SOT16	cluster C	1.22243	0.877433	encodes a desulfoglucosinolate sulfotransferase, involved in the final step of glucosinolate core structure biosynthesis. Has a broad-substrate specificity with different desulfoglucosinolates, the best substrate is indole-3-methyl-dsGS, followed by benzyl-dsGS. Expression was induced by wounding, jasmonate and ethylene stimulates.
AT1G06550		cluster C	1.66144	1.30138	ATP-dependent caseinolytic (Clp) protease/crotonase family protein;(source:Araport11)
AT5G40960		cluster C	2.72917	2.66667	transmembrane protein, putative (DUF 3339);(source:Araport11)
AT3G54140	PTR1	cluster D	0.528251	0.652179	Encodes a di- and tri-peptide transporter that recognizes a variety of different amino acid combinations. GFP-tagged PTR1 localizes to the plasma membrane and has 8 to 11 predicted transmembrane domains. PTR1 is expressed in a number of different vascular tissues throughout the plant based on promoter:GUS expression analysis. ptr1 mutants have a lower dry weight than wild type plants when both ar…
AT4G34590	GBF6	cluster D	1.51092	1.07787	Encodes a basic domain leucine zipper (bZip) transcription factor bZIP11. Translation is repressed by sucrose. Directly regulates gene expression of ASN1 and ProDH2, which are enzyme-coding genes involved in amino acid metabolism. Susceptibility factor during Pseudomonas syringae infection.
AT1G69930	GSTU11	cluster D	4.0625	1.6875	Encodes glutathione transferase belonging to the tau class of GSTs. Naming convention according to Wagner et al. (2002).
AT2G04680		cluster E	0.232394	0.471831	Cysteine/Histidine-rich C1 domain family protein;(source:Araport11)
AT2G22560	NET2D	cluster E	0.787926	0.842105	Kinase interacting (KIP1-like) family protein;(source:Araport11)
AT2G17590		cluster E	0.8	1.4	Cysteine/Histidine-rich C1 domain family protein;(source:Araport11)
AT2G40010		cluster E	1.7564	1.43193	Ribosomal protein L10 family protein;(source:Araport11)
AT1G34330		cluster F	0.0909091	1	Possibly not a pseudogene based on evidence for transcription (RNA-seq) and translation (Ribo-seq) described in PMID:27791167
AT1G30990		cluster F	0.208333	1.04167	Polyketide cyclase/dehydrase and lipid transport superfamily protein;(source:Araport11)
AT1G48640		cluster F	0.239316	0.683761	Transmembrane amino acid transporter family protein;(source:Araport11)
AT1G07795		cluster F	0.32	0.44	forkhead box protein G1;(source:Araport11)
AT1G53680	GSTU28	cluster F	0.457711	1.39303	Encodes glutathione transferase belonging to the tau class of GSTs. Naming convention according to Wagner et al. (2002).
AT1G22500	ATL15	cluster F	0.471178	1.06533	Gene encodes a putative C3HC4-type RING zinc finger factor. it is induced in response to light and ascorbate stimulus.
AT3G56000	CSLA14	cluster F	0.581144	1.017	encodes a gene similar to cellulose synthase
AT2G05160		cluster F	0.587678	1.20853	CCCH-type zinc fingerfamily protein with RNA-binding domain-containing protein;(source:Araport11)
AT4G31250	PRK7	cluster F	0.609389	0.729849	Leucine-rich repeat protein kinase family protein;(source:Araport11)
AT2G18450	SDH1-2	cluster F	0.687151	0.977654	Nuclear encoded mitochondrial flavoprotein subunit of succinate dehydrogenase complex .
AT1G50890		cluster F	0.754777	0.819533	ARM repeat superfamily protein;(source:Araport11)
AT3G07880	SCN1	cluster F	0.874	0.928	RhoGTPase GDP dissociation inhibitor (RhoGDI) that spatially restricts the sites of growth to a single point on the trichoblast. It regulates the NADPH oxidase RHD2/AtrbohC, which is required for hair growth.
AT1G15040	GAT1_2.1	cluster F	0.900155	0.463247	Encodes a nitrogen regulated putative glutamine amidotransferase that represses shoot branching.
AT2G01540	CAR10	cluster F	0.967693	1.08941	Calcium-dependent lipid-binding (CaLB domain) family protein;(source:Araport11)
AT2G21850		cluster F	1.05989	0.902825	Cysteine/Histidine-rich C1 domain family protein;(source:Araport11)
AT4G02390	PARP2	cluster F	1.14545	1.22	Encodes a DNA dependent nuclear poly (ADP-ribose) polymerase (E.C.2.4.2.30), thought to be involved in post-translational modification .
AT2G37440		cluster F	1.2322	0.815254	DNAse I-like superfamily protein;(source:Araport11)
AT2G28440		cluster F	1.47075	1.34262	proline-rich family protein;(source:Araport11)
AT5G49080	EXT11	cluster G	0.0107527	0.520039	transposable_element_gene;(source:Araport11);similar to proline-rich extensin-like family protein [Arabidopsis thaliana] (TAIR:AT5G06640.1);(source:TAIR10)
AT5G19800	HRGP2	cluster G	0.0495868	0.363636	hydroxyproline-rich glycoprotein family protein;(source:Araport11)
AT5G07080		cluster G	0.582	0.678	Encodes enzymes that can efficiently convert putrescine and caffeoyl-CoA to di-caffeoyl putrescine. Can convert spermidine/spermine and feruloyl CoA to mono-feruloyl spermidine/spermine. Has a preference for feruloyl-CoA binding, but little acyl-acceptor specificity.
AT2G29740	UGT71C2	cluster G	0.731691	0.793292	UDP-glucosyl transferase 71C2;(source:Araport11)
AT1G22570		cluster G	0.736434	0.833129	Major facilitator superfamily protein;(source:Araport11)
AT1G34760	GRF11	cluster G	0.746663	0.779126	Encodes a 14-3-3 protein. Binds H+-ATPase in response to blue light.
AT5G01610		cluster G	0.974359	1.11538	hypothetical protein (Protein of unknown function, DUF538);(source:Araport11)
AT4G16350	CBL6	cluster G	1.13198	0.994924	Calcium sensor protein. Binds CIPK14.
AT1G27740	RSL4	cluster H	0	0.538462	Basic helix-loop-helix (bHLH) transcription factor that is sufficient to promote postmitotic cell growth in root-hair cells. RSL4 is a direct transcriptional target of RHD6
AT1G69240	MES15	cluster H	0	0.418182	Encodes a protein predicted to act as a carboxylesterase. It has similarity to the SABP2 methyl salicylate esterase from tobacco but no enzymatic activity has been identified for this protein.
AT1G79860	ROPGEF12	cluster H	0	0.785047	Encodes a member of KPP-like gene family, homolog of KPP (kinase partner protein) gene in tomato. Also a member of the RopGEF (guanine nucleotide exchange factor) family, containing the novel PRONE domain (plant-specific Rop nucleotide exchanger), which is exclusively active towards members of the Rop subfamily. Coexpression of AtPRK2a with AtRopGEF12 resulted in isotropic pollen tube growth Grow…
AT2G46860	PPa3	cluster H	0	1.02128	Encodes a protein that might have inorganic pyrophosphatase activity.
AT3G12540	MIP1 leucine-zipper protein	cluster H	0	0.384211	ternary complex factor MIP1 leucine-zipper protein (Protein of unknown function, DUF547);(source:Araport11)
AT5G23030	TET12	cluster H	0	0.331081	Member of TETRASPANIN family
AT1G16440	RHS3	cluster H	0.0157895	0.505263	Member of AGC VIIIa Kinase gene family. Invovled in the maintenance of (p)ppGpp level to accustom plastidial gene expression to darkness.
AT1G30850	RSH4	cluster H	0.0215054	0.784946	root hair specific 4;(source:Araport11)
AT3G49960	PER35	cluster H	0.0217654	0.749698	Its expression is enriched in root hair cells (compared to non-root hair cells) and this enrichment is associated with increase in the transcription-associated mark trimethylation of H3 lysine 4 (H3K4me3) and decrease in the Polycomb silencing-associated mark trimethylation of H3 lysine 27 (H3K27me3) in root hair cells relative to non-root hair cells.
AT1G52660		cluster H	0.0281124	0.493976	P-loop containing nucleoside triphosphate hydrolases superfamily protein;(source:Araport11)
AT1G30870	PER7	cluster H	0.0332226	0.401993	Peroxidase superfamily protein;(source:Araport11)
AT1G12560	EXPA7, EXP7	cluster H	0.0363636	0.577033	Member of Alpha-Expansin Gene Family. Naming convention from the Expansin Working Group (Kende et al, 2004. Plant Mol Bio). Containing a conserved root hair-specific cis-element RHE. Expressed specifically in root hair cell and involved in root hair elongation.
AT2G47540		cluster H	0.0389864	0.615984	Pollen Ole e 1 allergen and extensin family protein;(source:Araport11)
AT2G03720	MRH6	cluster H	0.0444444	1.22222	Involved in root hair development
AT3G07070	PBL26	cluster H	0.056	0.729	Protein kinase superfamily protein;(source:Araport11)
AT5G49270	COBL9,SHV2	cluster H	0.0566929	0.533858	Involved in successfully establishing tip growth in root hairs.
AT5G15890	TBL21	cluster H	0.0584192	0.477663	Encodes a member of the TBL (TRICHOME BIREFRINGENCE-LIKE) gene family containing a plant-specific DUF231 (domain of unknown function) domain. TBL gene family has 46 members, two of which (TBR/AT5G06700 and TBL3/AT5G01360) have been shown to be involved in the synthesis and deposition of secondary wall cellulose, presumably by influencing the esterification state of pectic polymers. A nomenclature…
AT2G41970	MRI	cluster H	0.0589431	0.428862	Encodes MRI, a plasma membrane-localized member of the RLCK-VIII subfamily. Preferentially expressed in both pollen tubes and root hairs. mri-knockout mutants display spontaneous pollen tube and root-hair bursting.
AT5G05500	MOP10	cluster H	0.0684262	0.501466	Encodes Proline-rich protein-like PRPL1, controls elongation of root hairs.
AT2G34910		cluster H	0.0809399	0.428198	root hair specific protein;(source:Araport11)
AT1G48930	GH9C1	cluster H	0.0848485	0.605051	glycosyl hydrolase 9C1;(source:Araport11)
AT1G01750	ADF11	cluster H	0.0873362	0.866084	actin depolymerizing factor 11;(source:Araport11)
AT5G61350	CAP1	cluster H	0.101896	0.462085	Encodes a membrane-localized receptor-like kinase that regulates root hair tip growth by maintaining cytoplasmic Ca2+ gradients. Knockouts of CAP1 produced more cytoplasmic NH4+ and ceased growth of root hairs on MS medium except when NH4+ was depleted; NH4+ depletion reestablished the Ca2+ gradient necessary for normal growth. The lower net NH4+ influx across the vacuolar membrane and relatively…
AT5G62310	IRE	cluster H	0.108949	0.48249	Encodes a protein with a serine/threonine kinase domain. There are two other closely related members in Arabidopsis. Knock-out mutation results in incomplete root hair elongation. Expression is found all organs examined but is especially strong in elongating root hairs.
AT1G79320	MC6	cluster H	0.114625	0.671937	Encodes a putative metacaspase. Arabidopsis contains three type I MCP genes (MCP1a-c) and six type II MCP genes (MCP2a?f): AtMCP1a/At5g64240, AtMCP1b/At1g02170, AtMCP1c/At4g25110, AtMCP2a/At1g79310, AtMCP2b/At1g79330, AtMCP2c/At1g79320, AtMCP2d/At1g79340, AtMCP2e/At1g16420, AtMCP2f/At5g04200.
AT1G12950	RSH2,DTX31	cluster H	0.128692	0.377637	root hair specific 2;(source:Araport11)
AT4G27290		cluster H	0.154	0.429	S-locus lectin protein kinase family protein;(source:Araport11)
AT5G61550	PUB52	cluster H	0.15748	0.496063	U-box domain-containing protein kinase family protein;(source:Araport11)
AT4G09990	GXM2	cluster H	0.162	0.85	glucuronoxylan 4-O-methyltransferase-like protein (DUF579);(source:Araport11)
AT5G57550	XTH25	cluster H	0.196139	0.264093	xyloglucan endotransglycosylase-related protein (XTR3)
AT4G03330	SYP123	cluster H	0.221239	0.938053	member of SYP12 Gene Family
AT1G63450	RHS8,GT16	cluster H	0.221374	1.33588	Encodes a xyloglucan-specific galacturonosyltransferase (XUT1) that forms the beta-d-galactosyluronic acid-(1->2)-alpha-d-xylosyl linkage.
AT3G54870	MRH2	cluster H	0.387435	0.78534	Armadillo-repeat containing kinesin-related protein. Plays a role during transition to root-hair tip growth.Mutants have short, branched root hairs and an excess of endoplasmic microtubles. Phenotype suggests ARK1 plays a role in modulating microtubule depolymerization during root hair tip growth.An HKT2.4 (CS76404) - ARK1 variant causes root hair branching.
AT1G33700		cluster H	0.40277	0.510803	Beta-glucosidase, GBA2 type family protein;(source:Araport11)
AT1G73860		cluster H	0.461988	0.777778	P-loop containing nucleoside triphosphate hydrolases superfamily protein;(source:Araport11)
AT5G13150	EXO70C1	cluster H	0.479821	0.681614	A member of EXO70 gene family, putative exocyst subunits, conserved in land plants. Arabidopsis thaliana contains 23 putative EXO70 genes, which can be classified into eight clusters on the phylogenetic tree. This particular member is expressed in pollen and, together with EXO70C2, is involved in pollen tube elongation. Found in the cytoplasm and surprisingly, not found in the plasma membrane.
AT1G09170		cluster H	0.525292	0.571984	P-loop nucleoside triphosphate hydrolases superfamily protein with CH (Calponin Homology) domain-containing protein;(source:Araport11)
AT5G13990	EXO70C2	cluster H	0.543081	0.746736	A member of EXO70 gene family, putative exocyst subunits, conserved in land plants. Arabidopsis thaliana contains 23 putative EXO70 genes, which can be classified into eight clusters on the phylogenetic tree. This particular member is expressed in pollen and is involved in pollen tube elongation. Found in the cytoplasm and surprisingly, not found in the plasma membrane and is not found to colocal…
AT4G25160	PUB35	cluster H	0.545	0.848	Encodes a U-box domain-containing E3 ubiquitin ligase with central Ser/Thr protein kinase domain whose expression is responsive to both phosphate (Pi) and phosphite (Phi) in both roots and shoots.
AT2G37670		cluster H	0.555556	0.74359	Transducin/WD40 repeat-like superfamily protein;(source:Araport11)
AT4G24580	REN1	cluster H	0.576	0.689	Encodes a Rho GTPase-activating protein that interacts with ROP1 (a Rho GTPase) and regulates pollen tube development. This protein can be observed at the apical tip of growing pollen tubes and on endocytic vesicles traveling to this region of the pollen tube.
AT4G26770		cluster H	0.609	1.478	Phosphatidate cytidylyltransferase family protein;(source:Araport11)
AT1G04700		cluster H	0.61039	0.675325	PB1 domain-containing protein tyrosine kinase;(source:Araport11)
AT5G65160	TPR14	cluster H	0.697727	0.85	Encodes one of the 36 carboxylate clamp (CC)-tetratricopeptide repeat (TPR) proteins (Prasad 2010, Pubmed ID: 20856808) with potential to interact with Hsp90/Hsp70 as co-chaperones.
AT3G13782	NAP1;4,NFA4	cluster H	0.78022	1.20147	Plants mutated in three ubiquitously expressed NAP1 genes (NAP1;1~NAP1;3) and organ-specifically expressed NAP1;4 gene show hypersensitivity to genotoxic stresses including UV and DSB-inducing agent Bleomycin. The NAP1 genes act synergistically with NRP genes in promoting somatic homologous recombination.
AT2G45890	ROPGEF4	cluster H	0.80292	1.27007	Encodes a member of KPP-like gene family, homolog of KPP (kinase partner protein) gene in tomato. Also a member of the RopGEF (guanine nucleotide exchange factor) family, containing the novel PRONE domain (plant-specific Rop nucleotide exchanger), which is exclusively active towards members of the Rop subfamily. Mutants exhibit longer root hairs under phosphate-deficient conditions. Involved in c…
AT4G30560	CNGC9	cluster H	0.807	0.858	member of Cyclic nucleotide gated channel family. Required for constitutive growth of root hairs as Ca2+-permeable channels.
AT1G63930	ROH1	cluster H	0.834586	0.766917	EXO70 interactor and presumed negative secretion regulator.
AT1G35670	CDPK2	cluster H	0.841984	0.827745	Encodes a Ca(2+)-dependent, calmodulin-independent protein kinase that is rapidly induced by drought and high-salt stress but not by low-temperature stress or heat stress. Positive regulator of ABA signaling. Phosphorylates ABA responsive transcription factors ABF1 and ABF4.
AT4G07960	CSLC12	cluster H	0.889222	0.979042	encodes a XyG glucan synthase; gene similar to cellulose synthase
AT1G03550	SCAMP4	cluster H	0.919393	1.19276	Secretory carrier membrane protein (SCAMP) family protein;(source:Araport11)
AT3G05170		cluster H	1.112	0.961	Phosphoglycerate mutase family protein;(source:Araport11)
AT5G24310	ABIL3	cluster H	1.1561	1.02276	One of four ABI-like proteins.
AT2G39690		cluster H	1.26549	2.55457	ternary complex factor MIP1 leucine-zipper protein (Protein of unknown function, DUF547);(source:Araport11)
AT5G65090	BST1,MRH3	cluster H	1.81868	0.851648	Encodes a protein involved in root hair morphogenesis and tip growth. Required for restricting both the size of the root-hair initiation site and the width of the root hairs during the transition to tip growth, but, apparently, is not required for normal subsequent tip growth.
AT3G46760		cluster H
AT1G54970	RHS7, PRP1	cluster I	0	0.366109	encodes a proline-rich protein that is specifically expressed in the root. The mRNA is cell-to-cell mobile.
AT5G40860		cluster I	0	0.656716	transmembrane protein;(source:Araport11)
AT5G35190	EXT13	cluster I	0.009	0.468	proline-rich extensin-like family protein;(source:Araport11)
AT3G62680	PRP3	cluster I	0.00918133	0.39671	Proline-rich protein The mRNA is cell-to-cell mobile.
AT5G61650	CYCP4;2	cluster I	0.00942873	1.37493	The P-type cyclins (CYCPs) share a conserved central region of 100 amino acids ('cyclin box') displaying homology to the corresponding region of the PHO80 cyclin from Saccharomyces cerevisiae and the related G1 cyclins from Trypanosoma cruzi and T. brucei.
AT5G04960	PME46	cluster I	0.011811	0.634843	Encodes a protein that modulates the activity of pectin methylesterase within the cell wall.
AT1G62980	EXPA18	cluster I	0.0184109	0.425388	Alpha-expansin 18. Naming convention from the Expansin Working Group (Kende et al, 2004. Plant Mol Bio)
AT4G13390	EXT12	cluster I	0.0201493	0.309701	Proline-rich extensin-like family protein;(source:Araport11)
AT5G06640	EXT10	cluster I	0.024	0.476	Proline-rich extensin-like family protein;(source:Araport11)
AT1G12040	LRX1	cluster I	0.026576	0.410383	encodes a a chimeric leucine-rich repeat/extensin protein that regulates root hair morphogenesis and elongation. Null mutants develop root hairs that frequently abort, swell, or branch. Gene is expressed in root hair cells and protein is specifically localized in the wall of the hair proper. The mRNA is cell-to-cell mobile.
AT4G25820	XTH14	cluster I	0.0278008	0.583402	Encodes a xyloglucan endotransglycosylase with a clear preference for non-fucosylated xyloglucan polymer. The mRNA is cell-to-cell mobile.
AT5G67400	RHS19,PER73	cluster I	0.0297561	0.519512	root hair specific 19;(source:Araport11)
AT3G10710	RHS12	cluster I	0.0305206	0.369838	root hair specific 12;(source:Araport11)
AT4G25220	G3Pp2	cluster I	0.034	0.495	Encodes a member of the phosphate starvation-induced glycerol-3-phosphate permease gene family: AT3G47420(G3Pp1), AT4G25220(G3Pp2), AT1G30560(G3Pp3), AT4G17550(G3Pp4) and AT2G13100(G3Pp5).
AT4G33730	ATCAPE1	cluster I	0.0384615	0.646154	Member of CAP protein superfamily. Encoding a small 11 AA peptide (PAGNYIGARPY) involved in negative regulation of salt tolerance.
AT4G02270	RHS13,SRPP	cluster I	0.0462259	0.753657	root hair specific 13;(source:Araport11)
AT4G40090	AGP3	cluster I	0.0539237	0.571679	arabinogalactan protein 3;(source:Araport11)
AT4G29180	RHS16	cluster I	0.0682927	0.54878	root hair specific 16;(source:Araport11)
AT4G00680	ADF8	cluster I	0.0832025	0.701727	actin depolymerizing factor 8;(source:Araport11)
AT4G25790	CAPE4	cluster I	0.0835073	0.492693	CAP (Cysteine-rich secretory proteins, Antigen 5, and Pathogenesis-related 1 protein) superfamily protein;(source:Araport11)
AT3G54580	EXT17	cluster I	0.198121	0.496869	Proline-rich extensin-like family protein;(source:Araport11)
AT4G19680	IRT2	cluster I	0.208092	0.491329	encodes an iron transporter whose expression is induced by iron and zinc deficiency. Gene is specifically expressed in the external cell layers of the root subapical zone.
AT1G70460	PERK13	cluster I	0.216292	0.674157	Encodes a member of the proline-rich extensin-like receptor kinase (PERK) family. This family consists of 15 predicted receptor kinases (PMID: 15653807).
AT4G34580	COW1,SFH1	cluster I	0.221	0.738	Encodes COW1 (can of worms1), a phosphatidylinositol transfer protein essential for root hair tip growth. The N-terminus of the COW1 protein is 32% identical to an essential phosphatidylinositol transfer protein (PITP), the yeast Sec14 protein (sec14p) while the C-terminus is 34.5% identical to a late nodulin of Lotus japonicus, Nlj16. Expression of COW1 complements the growth defect associated w…
AT3G60330	HA7	cluster I	0.251349	0.547417	H[+]-ATPase 7;(source:Araport11)
AT1G35330	ATL34	cluster I	0.254658	0.720497	RING/U-box superfamily protein;(source:Araport11)
AT5G58010	LRL3	cluster I	0.336761	0.634961	Encodes a basic helix-loop-helix (bHLH) protein that regulates root hair development. One of the three Arabidopsis homologs of the Lotus japonicus ROOTHAIRLESS1 (LjRHL1) gene: At2g24260 (AtLRL1), At4g30980 (AtLRL2), and At5g58010 (AtLRL3).
AT2G45750		cluster I	0.346341	0.694634	S-adenosyl-L-methionine-dependent methyltransferases superfamily protein;(source:Araport11)
AT4G29800	PLP8	cluster I	0.691761	0.715909	PATATIN-like protein 8;(source:Araport11)
AT3G54040	PAR1	cluster I	0.765182	0.380198	PAR1 protein;(source:Araport11)
AT1G18940		cluster I	0.803279	0.781421	Nodulin-like / Major Facilitator Superfamily protein;(source:Araport11)
AT4G18640	MRH1	cluster I	0.888723	0.901419	Required for root hair elongation during tip growth. The mRNA is cell-to-cell mobile.
AT3G03520	NPC3	cluster I	1.02973	0.96052	Lysophosphatidic acid phosphatase highly expressed during phosphate starvation and abiotic stresses. Role in lipid synthesis.
AT1G65180		cluster J	0.837398	1.06504	Cysteine/Histidine-rich C1 domain family protein;(source:Araport11)
AT2G01090		cluster J	1.25275	1.60165	Ubiquinol-cytochrome C reductase hinge protein;(source:Araport11)
AT4G20480		cluster J	1.27	1.167	Putative endonuclease or glycosyl hydrolase;(source:Araport11)
AT4G14980		cluster J	1.55789	2.03158	Cysteine/Histidine-rich C1 domain family protein;(source:Araport11)
AT2G02630		cluster J	2.27374	1.31844	Cysteine/Histidine-rich C1 domain family protein;(source:Araport11)
AT3G15760		cluster K	0.6663	1.45815	cytochrome P450 family protein;(source:Araport11)
AT2G24260	LRL1	cluster K	0.708805	0.90464	Encodes a basic helix-loop-helix (bHLH) protein that regulates root hair and sperm cell development. One of the three Arabidopsis homologs of the Lotus japonicus ROOTHAIRLESS1 (LjRHL1) gene: At2g24260 (AtLRL1), At4g30980 (AtLRL2), and At5g58010 (AtLRL3).
AT1G15880	GOS11	cluster K	0.893162	1.00693	Golgi SNARE 11 protein (GOS11)
AT5G40510		cluster K	0.942105	0.818045	Sucrase/ferredoxin-like family protein;(source:Araport11)
AT1G14685	BPC2	cluster K	1.06194	1.27339	Encodes a member of the BASIC PENTACYSTEINE (BPC) proteins. BPC proteins are plant-specific transcription factors present throughout land plants. BPC transcription factor family is integral for a wide range of processes that support normal growth and development.Along with BPC1, BPC2 binds to the promoter of and represses GALS1 thereby reducing beta 1,4- galactan accumulation.
AT4G15390		cluster L	0.419361	0.831361	HXXXD-type acyl-transferase family protein;(source:Araport11)
AT2G18690		cluster L	0.61019	0.358674	transmembrane protein;(source:Araport11)
AT4G12330	CYP706A7	cluster L	0.678617	0.790013	member of CYP706A
AT1G16260	WAKL8	cluster L	0.856994	0.850234	Wall-associated kinase family protein;(source:Araport11)
AT5G46250	LARP6a	cluster L	0.919562	0.933386	RNA-binding protein;(source:Araport11)
AT4G14610		cluster L	1.02806	0.688776	Probably not a pseudogene based on evidence for transcription (RNA-seq) and translation (Ribo-seq) described in PMID:27791167
AT1G55020	LOX1	cluster L	1.39302	0.714481	lipoxygenase, a defense gene conferring resistance Xanthomonas campestris The mRNA is cell-to-cell mobile.
AT3G23190		cluster L	1.53033	0.879648	HR-like lesion-inducing protein-like protein;(source:Araport11)
AT2G45220	PME17	cluster M	0.0607921	0.573227	Pectin methylesterase involved in pectin remodelling. Regulated by its PRO region that triggers PME activity in the resistance to Botrytis cinerea.
AT3G29410	TPS25	cluster M	0.308	0.632	Terpenoid cyclases/Protein prenyltransferases superfamily protein;(source:Araport11)
AT3G28910	MYB30	cluster M	1.13764	1.52449	Encodes a MYB family transcriptional regulator.It is a a positive regulator of the pathogen-induced hypersensitive response and of brassinosteroid and abscisic acid signaling and a negative regulator of photomorphogenesis. Accumulation of MYB30 is light regulated and activity is modulated by SUMOlaytion. MYB30 can for complexes with different bHLH components to regulate expression of different pa…
AT5G10520	RBK1	cluster M	1.94408	0.905702	ROP binding protein kinases 1;(source:Araport11)
AT1G16360		cluster M	2.29167	1.85417	LEM3 (ligand-effect modulator 3) family protein / CDC50 family protein;(source:Araport11)
AT5G46670		cluster M
AT2G20520	FLA6	cluster N	0	0.6	fasciclin-like arabinogalactan-protein 6 (Fla6). Possibly involved in embryogenesis and seed development.
AT5G22410	RHS18,PER60	cluster N	0	0.621777	root hair specific 18;(source:Araport11)
AT5G57540	XTH13	cluster N	0.00732601	0.582418	Encodes a xyloglucan endotransglucosylase/hydrolase with only only the endotransglucosylase (XET; EC 2.4.1.207) activity towards xyloglucan and non-detectable endohydrolytic (XEH; EC 3.2.1.151) activity.
AT5G57530	XTH12	cluster N	0.02	0.566	xyloglucan endotransglucosylase/hydrolase 12;(source:Araport11)
AT4G28850	XTH26	cluster N	0.0233463	0.898833	xyloglucan endotransglucosylase/hydrolase 26;(source:Araport11)
AT1G34510	PER8	cluster N	0.0693069	0.422442	Peroxidase superfamily protein;(source:Araport11)
AT5G24520	TTG1	group 1	0.727147	0.735816	Required for the accumulation of purple anthocyanins in leaves and stems. Involved in trichome and root hair development. Controls epidermal cell fate specification. Affects dihydroflavonol 4-reductase gene expression. It is thought that a ternary complex composed of TT2, TT8 and TTG1 is necessary for correct expression of BAN in seed endothelium. Based on clonal analysis and other methonds TTG1 …
AT5G40330	MYB23	group 1	0.774908	0.715867	Encodes a MYB gene that, when overexpressed ectopically, can induce ectopic trichome formation. It is a member of subgroup 15, together with WER and GL1. Members of this subgroup share a conserved motif of 19 amino acids in the putative transcription activation domain at the C-terminal end. The gene is expressed in leaves, stems, flowers, seeds and roots and quite strongly in trichomes. There is …
AT5G41315	GL3	group 1	1.02083	1.10417	Encodes a basic helix loop helix domain protein that interacts with GL1 in trichome development.GL3 interacts with JAZ and DELLA proteins to regulate trichome initiation.
AT5G14750	WER,MYB66	group 1	1.7341	2.01156	Encodes a MyB-related protein containing R2 and R3 repeats, involved in root and hypocotyl epidermal cell fate determination. Loss of function mutations make extra root hairs. Nuclear localized protein is a positive regulator for expression of CAPRICE (CPC).
AT1G63650	EGL3	group 1	1.9108	1.69484	Mutant has reduced trichomes, anthocyanin, and seed coat mucilage and abnormally patterned stomates. Mutants are defective in jasmonate-induced anthocyanin accumulation. Encodes a bHLH Transcription Factor 1. The protein is functionally redundant with GL3 and TT8 and interacts with TTG1, the myb proteins GL1, PAP1 and 2, CPC and TRY, and it will form heterodimers with GL3. Expression in N (non-ha…
AT5G53200	TRY	group 2	0.875	1.125	Encodes a R3MYB transcription inhibitor that regulates trichome patterning. Mutants produce trichome clusters whereas other transcriptional inhibitors involved in this patterning are involved in trichome density regulation. Natural hypofunctional alleles producing trichome development in fruits have been found.
AT2G46410	CPC	group 2	0.993007	1.45455	Nuclear-localized R3-type MYB transcription factor. Positive regulator of hair-cell differentiation. Preferentially transcribed in hairless cells. Moves from atrichoblasts into trichoblast via plasmodesmata in a tissue-specific mode. N-terminus and part of the Myb domain are required for this movement, with W76 playing a crucial role. Capability to increase the size-exclusion limit of plasmodesma…
AT1G01380	ETC1	group 2	1.439	3.073	ETC1 is involved in trichome and root hair patterning in Arabidopsis.
AT5G51060	RHD2	group 3	0.506823	0.583821	RHD2 (along with RHD3 and RHD4) is required for normal root hair elongation. Has NADPH oxidase activity. Gene is expressed in the elongation and differention zone in trichoblasts and elongating root hairs. RDH2 is localized to the growing tips of root hair cells. It is required for the production of reactive oxygen species in response to extracellular ATP stimulus. The increase in ROS production …
AT3G03050	CSLD3	group 3	0.927	0.879	encodes a cellulose synthase like protein. mutations initiate root hairs that rupture at their tip soon after initiation. is required for the synthesis of a noncellulosic wall polysaccharide.
AT2G48080	ALKBH10A	group 4	0.973	0.683	oxidoreductase, 2OG-Fe(II) oxygenase family protein;(source:Araport11)
AT1G05630	5PTASE13	group 4	1.27719	1.31883	Encodes an inositol polyphosphate 5-phosphatase with phosphatase activity toward only Ins(1,4,5)P3. Induced in response to ABA and wounding treatments. Expressed in young seedlings and flowers, while no transcripts were detectable in maturated roots, stems, and rosette leaves Modulates the development of cotyledon veins through its regulation of auxin homeostasis. Involved in blue light light?sti…
AT1G71530		group 5	0.226168	0.491589	Protein kinase superfamily protein;(source:Araport11)
AT3G47340	ASN1	group 5	0.535	0.349	encodes a glutamine-dependent asparagine synthetase, the predicted ASN1 peptide contains a purF-type glutamine-binding domain, and is expressed predominantly in shoot tissues, where light has a negative effect on its mRNA accumulation. Expression is induced within 3 hours of dark treatment, in senescing leaves and treatment with exogenous photosynthesis inhibitor. Induction of gene expression was…
AT5G24140	SQP2	no	0.264	0.341	Encodes a protein with similarity to squalene monoxygenases.
AT1G66470	RHD6	no	0.364929	0.7109	ROOT HAIR DEFECTIVE6;(source:Araport11)
AT4G16190		no	0.476	0.663	Papain family cysteine protease;(source:Araport11)
AT1G79840	GL2	no	0.604923	0.563761	Glabra 2, a homeodomain protein affects epidermal cell identity including trichomes, root hairs, and seed coat. It also down-regulates seed oil content. Expressed in atrichoblasts and required to suppress root hair development. Also expressed abundantly during early seed development. Directly regulated by WER.
AT5G16900	LFR	no	0.738	0.768	Leucine-rich repeat protein kinase family protein;(source:Araport11)
AT5G05400		no	0.76	0.621	LRR and NB-ARC domains-containing disease resistance protein;(source:Araport11)
AT3G26744	ICE1	no	1.04922	1.05802	Encodes a MYC-like bHLH transcriptional activator that binds specifically to the MYC recognition sequences in the CBF3 promoter. It also binds to and inhibits the expression of ABI3. Mutants are defective in cold-regulated gene expression and ABA signaling druing seed germination.. Cold stress triggers protein degradation of nuclear GFPICE1 protein, and the RING finger protein HOS1 is required. S…
AT2G37260	TTG2	no	1.19149	1.42021	Encodes a protein similar to WRKY transcription factors that is expressed in the seed integument and endosperm. Mutants are defective in proanthocyanidin synthesis and seed mucilate deposition. Seeds are yellow colored. Seed size is also affected; seeds are reduced in size but only when the mutant allele is transmitted through the female parent.Loss of function alleles are associated with a reduc…
AT1G32870	NAC13	no	1.21218	0.711728	Expression in rosette leaves is activated by high concentration of boron.
AT4G22640	LTPG prot	no	1.269	1.192	LTPG protein
AT4G00480	MYC1	no	1.422	1.625	MYC-related protein with a basic helix-loop-helix motif at the C-terminus and a region similar to the maize B/R family at the N-terminus
AT5G15950	SAMDC2	no	1.923	1.71	Adenosylmethionine decarboxylase family protein;(source:Araport11)

## Sheet: S9. Yi et al., 2010
Table S9. Root hair genes according to Yi et al., 2021, and their transcription change upon ZFP3 overexpression.
AGI	Protein	Fold change/Short ZFP3ox	Fold change/Long ZFP3ox	Gene Model Description
AT1G34540	CYP94D1	0	0.607143	member of CYP94D
AT2G20520	FLA6	0	0.6	fasciclin-like arabinogalactan-protein 6 (Fla6). Possibly involved in embryogenesis and seed development.
AT3G12540	MIP1	0	0.384211	ternary complex factor MIP1 leucine-zipper protein (Protein of unknown function, DUF547);(source:Araport11)
AT2G46860	PPa3	0	1.02128	Encodes a protein that might have inorganic pyrophosphatase activity.
AT4G22080	RHS14	0	0.5	root hair specific 14;(source:Araport11)
AT5G22410	RHS18,PER60	0	0.621777	root hair specific 18;(source:Araport11)
AT1G54970	RHS7, PRP1	0	0.366109	encodes a proline-rich protein that is specifically expressed in the root. The mRNA is cell-to-cell mobile.
AT1G27740	RSL4	0	0.538462	Basic helix-loop-helix (bHLH) transcription factor that is sufficient to promote postmitotic cell growth in root-hair cells. RSL4 is a direct transcriptional target of RHD6
AT5G23030	TET12	0	0.331081	Member of TETRASPANIN family
AT5G26080		0	1.23077	proline-rich family protein;(source:Araport11)
AT5G40860		0	0.656716	transmembrane protein;(source:Araport11)
AT5G41730		0	0.342466	Protein kinase family protein;(source:Araport11)
AT5G57540	XTH13	0.00732601	0.582418	Encodes a xyloglucan endotransglucosylase/hydrolase with only only the endotransglucosylase (XET; EC 2.4.1.207) activity towards xyloglucan and non-detectable endohydrolytic (XEH; EC 3.2.1.151) activity.
AT3G62680	PRP3	0.00918133	0.39671	Proline-rich protein The mRNA is cell-to-cell mobile.
AT4G08410	EXT8	0.00929368	0.479554	Proline-rich extensin-like family protein;(source:Araport11)
AT5G61650	CYCP4;2	0.00942873	1.37493	The P-type cyclins (CYCPs) share a conserved central region of 100 amino acids ('cyclin box') displaying homology to the corresponding region of the PHO80 cyclin from Saccharomyces cerevisiae and the related G1 cyclins from Trypanosoma cruzi and T. brucei.
AT1G62980	EXPA18	0.0184109	0.425388	Alpha-expansin 18. Naming convention from the Expansin Working Group (Kende et al, 2004. Plant Mol Bio)
AT5G57530	XTH12	0.0200803	0.566265	xyloglucan endotransglucosylase/hydrolase 12;(source:Araport11)
AT4G13390	EXT12	0.0201493	0.309701	Proline-rich extensin-like family protein;(source:Araport11)
AT1G30850	RSH4	0.0215054	0.784946	root hair specific 4;(source:Araport11)
AT4G28850	XTH26	0.0233463	0.898833	xyloglucan endotransglucosylase/hydrolase 26;(source:Araport11)
AT5G06640	EXT10	0.0235383	0.476082	Proline-rich extensin-like family protein;(source:Araport11)
AT4G25820	XTH14	0.0278008	0.583402	Encodes a xyloglucan endotransglycosylase with a clear preference for non-fucosylated xyloglucan polymer. The mRNA is cell-to-cell mobile.
AT5G67400	RHS19,PER73	0.0297561	0.519512	root hair specific 19;(source:Araport11)
AT3G10710	RHS12	0.0305206	0.369838	root hair specific 12;(source:Araport11)
AT1G30870	PER7	0.0332226	0.401993	Peroxidase superfamily protein;(source:Araport11)
AT4G25220	G3Pp2	0.0338983	0.494915	Encodes a member of the phosphate starvation-induced glycerol-3-phosphate permease gene family: AT3G47420(G3Pp1), AT4G25220(G3Pp2), AT1G30560(G3Pp3), AT4G17550(G3Pp4) and AT2G13100(G3Pp5).
AT1G12560	EXPA7, EXP7	0.0363636	0.577033	Member of Alpha-Expansin Gene Family. Naming convention from the Expansin Working Group (Kende et al, 2004. Plant Mol Bio). Containing a conserved root hair-specific cis-element RHE. Expressed specifically in root hair cell and involved in root hair elongation.
AT5G24880		0.0412371	0.824742	Chromo domain cec-like protein;(source:Araport11)
AT2G03720	MRH6	0.0444444	1.22222	Involved in root hair development
AT4G02270	RHS13,SRPP	0.0462259	0.753657	root hair specific 13;(source:Araport11)
AT5G19800	HRGP2	0.0495868	0.363636	hydroxyproline-rich glycoprotein family protein;(source:Araport11)
AT1G05240	PER2,PR9	0.05006	0.63729	Peroxidase superfamily protein;(source:Araport11)
AT4G40090	AGP3	0.0539237	0.571679	arabinogalactan protein 3;(source:Araport11)
AT3G07070	PBL26	0.056338	0.728873	Protein kinase superfamily protein;(source:Araport11)
AT5G19790	RAP2.11	0.0590278	0.524306	encodes a member of the ERF (ethylene response factor) subfamily B-6 of ERF/AP2 transcription factor family (RAP2.11). The protein contains one AP2 domain. There are 12 members in this subfamily including RAP2.11.
AT3G60280	UCC3	0.06	0.466667	Encodes blue copper-binding protein III.
AT1G34510	PER8	0.0693069	0.422442	Peroxidase superfamily protein;(source:Araport11)
AT4G00680	ADF8	0.0832025	0.701727	actin depolymerizing factor 8;(source:Araport11)
AT4G25790	CAPE4	0.0835073	0.492693	CAP (Cysteine-rich secretory proteins, Antigen 5, and Pathogenesis-related 1 protein) superfamily protein;(source:Araport11)
AT1G34330		0.0909091	1	Possibly not a pseudogene based on evidence for transcription (RNA-seq) and translation (Ribo-seq) described in PMID:27791167
AT5G61350	CAP1	0.101896	0.462085	Encodes a membrane-localized receptor-like kinase that regulates root hair tip growth by maintaining cytoplasmic Ca2+ gradients. Knockouts of CAP1 produced more cytoplasmic NH4+ and ceased growth of root hairs on MS medium except when NH4+ was depleted; NH4+ depletion reestablished the Ca2+ gradient necessary for normal growth. The lower net NH4+ influx across the vacuolar membrane and relatively…
AT1G25240	PICALM9A	0.128205	0.615385	ENTH/VHS/GAT family protein;(source:Araport11)
AT4G30320	CAPE6	0.129032	1.23118	CAP (Cysteine-rich secretory proteins, Antigen 5, and Pathogenesis-related 1 protein) superfamily protein;(source:Araport11)
AT5G18910		0.15	1.225	Protein kinase superfamily protein;(source:Araport11)
AT5G61550	PUB52	0.15748	0.496063	U-box domain-containing protein kinase family protein;(source:Araport11)
AT5G07450	CYCP4;3	0.192982	0.701754	cyclin p4;(source:Araport11)
AT4G19680	IRT2	0.208092	0.491329	encodes an iron transporter whose expression is induced by iron and zinc deficiency. Gene is specifically expressed in the external cell layers of the root subapical zone.
AT4G03330	SYP123	0.221239	0.938053	member of SYP12 Gene Family
AT4G34580	COW1,SFH1	0.221384	0.738365	Encodes COW1 (can of worms1), a phosphatidylinositol transfer protein essential for root hair tip growth. The N-terminus of the COW1 protein is 32% identical to an essential phosphatidylinositol transfer protein (PITP), the yeast Sec14 protein (sec14p) while the C-terminus is 34.5% identical to a late nodulin of Lotus japonicus, Nlj16. Expression of COW1 complements the growth defect associated w…
AT5G03640	AGC1-8	0.221675	0.674877	AGCVIII kinase involved in the pulse-induced first positive phototropism.
AT5G51270	PUB53	0.222222	0.513228	Plant U-box type E3 ubiquitin ligase (PUB).
AT1G35330	ATL34	0.254658	0.720497	RING/U-box superfamily protein;(source:Araport11)
AT1G59850		0.259109	0.91498	ARM repeat superfamily protein;(source:Araport11)
AT1G51880	RHS6	0.283019	0.836478	root hair specific 6;(source:Araport11)
AT3G01175		0.324786	0.523504	transmembrane protein;(source:Araport11)
AT2G25240	CCP3	0.348485	0.94697	Serine protease inhibitor (SERPIN) family protein;(source:Araport11). Involved in stress response regulated cell death.
AT1G61080		0.415254	0.618644	Hydroxyproline-rich glycoprotein family protein;(source:Araport11)
AT2G38500		0.420233	0.614786	2-oxoglutarate (2OG) and Fe(II)-dependent oxygenase superfamily protein;(source:Araport11)
AT2G02990	RNS1	0.446154	0.215385	Encodes a member of the ribonuclease T2 family that responds to inorganic phosphate starvation, and inhibits production of anthocyanin. Also involved in wound-induced signaling independent of jasmonic acid. Its expression is responsive to both phosphate (Pi) and phosphite (Phi) in roots.
AT4G01820	ABCB3	0.490196	0.411765	member of MDR subfamily
AT3G53150	UGT73D1	0.510086	0.276657	UDP-glucosyl transferase 73D1;(source:Araport11)
AT2G39710		0.541764	0.722092	Encodes a Cysteine-rich peptide (CRP) family protein
AT5G43580	UPI	0.583438	0.705529	Predicted to encode a PR (pathogenesis-related) peptide that belongs to the PR-6 proteinase inhibitor family. Functions in resistance to necrotrophic fungi and insect herbivory. Six putative PR-6-type protein encoding genes are found in Arabidopsis: At2g38900, At2g38870, At5g43570, At5g43580, At3g50020 and At3g46860.
AT1G05340	ATHCYSTM1	0.595533	0.592225	cysteine-rich TM module stress tolerance protein;(source:Araport11)
AT2G29450	GSTU5	0.652152	0.833165	Encodes a member of the TAU glutathione S-transferase gene family. Gene expression is induced by exposure to auxin, pathogen and herbicides. Naming convention according to Wagner et al. (2002)
AT1G21130	IGMT4	0.656544	0.655369	O-methyltransferase family protein;(source:Araport11)
AT4G04900	RIC10	0.686567	1.43284	encodes a member of a novel protein family that contains contain a CRIB (for Cdc42/Rac-interactive binding) motif required for their specific interaction with GTP-bound Rop1 (plant-specific Rho GTPase). Most similar to RIC9 and RIC11 (subfamily group I). Gene is expressed predominantly in roots, leaves, and seedlings.
AT1G34760	GRF11	0.746663	0.779126	Encodes a 14-3-3 protein. Binds H+-ATPase in response to blue light.
AT3G02240	RGF7	0.803874	0.66586	Encodes a root meristem growth factor (RGF). Belongs to a family of functionally redundant homologous peptides that are secreted, tyrosine-sulfated, and expressed mainly in the stem cell area and the innermost layer of central columella cells. RGFs are required for maintenance of the root stem cell niche and transit amplifying cell proliferation. Members of this family include: At5g60810 (RGF1), …
AT3G63380	ACA12	0.817011	0.411237	ATPase E1-E2 type family protein / haloacid dehalogenase-like hydrolase family protein;(source:Araport11)
AT5G49700	AHL17	0.858141	0.710938	Putative AT-hook DNA-binding family protein;(source:Araport11)
AT2G21880	RAB7A	0.867876	2.23575	RAB GTPase homolog 7A;(source:Araport11)
AT2G03980		0.873343	0.918508	GDSL-motif esterase/acyltransferase/lipase. Enzyme group with broad substrate specificity that may catalyze acyltransfer or hydrolase reactions with lipid and non-lipid substrates.
AT1G22880	CEL5	1.08791	0.991041	cellulase 5;(source:Araport11)
AT1G17180	GSTU25	1.26441	1.39096	Encodes glutathione transferase belonging to the tau class of GSTs. Naming convention according to Wagner et al. (2002). Detoxification of the environmental pollutant 2,4,6-trinitrotoluene. Arabidopsis plant over-expressing At1g17180 were more resistant to TNT, removed more TNT from sterile and soil-based media, and had reduced levels of glutathione when grown in the presence of TNT.
AT1G24030	PBL28	1.28902	1.84971	Protein kinase superfamily protein;(source:Araport11)
AT1G16370	OCT6,	1.6072	1.05164	organic cation/carnitine transporter 6;(source:Araport11)
AT1G26420	BBE7	1.81264	0.782135	FAD-binding Berberine family protein;(source:Araport11)
AT1G31750	GPRP1	1.87755	2.02041	proline-rich family protein;(source:Araport11)
AT1G26250	EXT18	1.91331	0.333226	Proline-rich extensin-like family protein;(source:Araport11)

## Sheet: S10. Grierson et al., 2014
Table S10. Root hair genes compiled by Grierson et al., 2014, and their transcription change by ZFP3 overexpression.
AGI	Protein	Category	Fold change/Short ZFP3ox	Fold change/Long ZFP3ox	Mutant Phenotype	Gene Model Description
AT1G79840	GL2	Cell-Type Patterning	0.604923	0.563761	Ectopic root hairs	Glabra 2, a homeodomain protein affects epidermal cell identity including trichomes, root hairs, and seed coat. It also down-regulates seed oil content. Expressed in atrichoblasts and required to suppress root hair development. Also expressed abundantly during early seed development. Directly regulated by WER.
AT5G24520	TTG1	Cell-Type Patterning	0.727147	0.735816	Ectopic root hairs	Required for the accumulation of purple anthocyanins in leaves and stems. Involved in trichome and root hair development. Controls epidermal cell fate specification. Affects dihydroflavonol 4-reductase gene expression. It is thought that a ternary complex composed of TT2, TT8 and TTG1 is necessary for correct expression of BAN in seed endothelium. Based on clonal analysis and other methonds TTG1 …
AT5G40330	MYB23	Cell-Type Patterning	0.774908	0.715867	Slight ectopic hairs	Encodes a MYB gene that, when overexpressed ectopically, can induce ectopic trichome formation. It is a member of subgroup 15, together with WER and GL1. Members of this subgroup share a conserved motif of 19 amino acids in the putative transcription activation domain at the C-terminal end. The gene is expressed in leaves, stems, flowers, seeds and roots and quite strongly in trichomes. There is …
AT1G05850	ERH2,POM1	Cell-Type Patterning	0.800246	0.699352	Ectopic root hairs	Encodes an endo chitinase-like protein AtCTL1. Essential for tolerance to heat, salt and drought stresses. Also involved in root hair development, cell expansion and response to cytokinin. Allelic to erh2. 11 alleles described in Hauser (1995). Mutant is defective in acquired thermotolerance, appears semidwarf throughout its life cycle and has extra lateral branches. There are two EMS alleles. Ex…
AT5G53200	TRY	Cell-Type Patterning	0.875	1.125	None	Encodes a R3MYB transcription inhibitor that regulates trichome patterning. Mutants produce trichome clusters whereas other transcriptional inhibitors involved in this patterning are involved in trichome density regulation. Natural hypofunctional alleles producing trichome development in fruits have been found.
AT2G46410	CPC	Cell-Type Patterning	0.993007	1.45455	Reduced number of root hairs	Nuclear-localized R3-type MYB transcription factor. Positive regulator of hair-cell differentiation. Preferentially transcribed in hairless cells. Moves from atrichoblasts into trichoblast via plasmodesmata in a tissue-specific mode. N-terminus and part of the Myb domain are required for this movement, with W76 playing a crucial role. Capability to increase the size-exclusion limit of plasmodesma…
AT5G03150	JKD	Cell-Type Patterning	1.02052	1.32555	Abnormal epidermal pattern	JKD is a nuclear-localized putative transcription factor of the BIRDS/IDD C2H2 zinc finger family. JKD and its homologue BIB, restrict SHR movement to a single layer, the endodermis, and delimit tissue boundaries in the root meristem through a process that involves nuclear retention through protein complex formation. JKD mutation leads to periclinal divisions in the cortex, increased cell numbers…
AT5G41315	GL3	Cell-Type Patterning	1.02083	1.10417	Ectopic root hairs	Encodes a basic helix loop helix domain protein that interacts with GL1 in trichome development.GL3 interacts with JAZ and DELLA proteins to regulate trichome initiation.
AT1G48380	RHL1	Cell-Type Patterning	1.0223	1.16057	Reduced number of root hairs	Encodes a novel nuclear protein required for root hair initiation and ploidy-dependent cell growth. Its sequence has similarity to the C-terminal domain of mammalian DNA topo IIalpha. Shows in vitro DNA binding activity and is likely to be part of the topo VI complex by binding to subunit A.
AT5G61070	HDA18	Cell-Type Patterning	1.0339	1.16949	Ectopic root hairs	Encodes a protein with similarity to histone deacetylases, a class of chromatin remodeling factors which act on H3/H4 histones. Class II RPD3-like family HDAC member which controls negative responses to salinity stress. Expressed in roots where it appears to regulate the expression of epidermal cell fate genes controlling hair cell differentiation.
AT5G55540	TRN1,LOP1	Cell-Type Patterning	1.10178	0.872285	Disorganized root cells	Encodes a large plant-specific protein of unknown function, with conserved domains also found in a variety of signaling proteins, In trn mutants, the leaf venation network had a severely reduced complexity: incomplete loops, no tertiary or quaternary veins, and vascular islands. The leaf laminas were asymmetric and narrow because of a severely reduced cell number. TRN1 is required for the mainten…
AT1G80350	ERH3	Cell-Type Patterning	1.13472	1.02286	Ectopic root hairs	encodes a p60 katanin protein that is expressed throughout the plant. Required for the specification of cell fates from early in development (in the meristem) through differentiation and for normal postmitotic organization of cortical microtubules into transverse arrays in root epidermis cells. Mutants display cytoskeletal defects.
AT1G11130	SUB, SCM	Cell-Type Patterning	1.15436	1.02158	Abnormal epidermal cell pattern	Encodes an atypical receptor-like kinase protein with a predicted extracellular domain of six leucine-rich repeats and an intracellular serine-threonine kinase domain expressed throughout the developing root but whose kinase activity is not essential for its function in vivo. Regulates expression of GLABRA2, CAPRICE, WEREWOLF, and ENHANCER OF GLABRA3. Required for floral organ shape, the developm…
AT2G37260	TTG2	Cell-Type Patterning	1.19149	1.42021	None	Encodes a protein similar to WRKY transcription factors that is expressed in the seed integument and endosperm. Mutants are defective in proanthocyanidin synthesis and seed mucilate deposition. Seeds are yellow colored. Seed size is also affected; seeds are reduced in size but only when the mutant allele is transmitted through the female parent.Loss of function alleles are associated with a reduc…
AT3G20780	RHL3, TOP6B	Cell-Type Patterning	1.22235	1.1095	Reduced number of root hairs	Encodes putative eukaryotic homolog of archaebacterial topoisomerase VI subunit B, TOP6B. Is essential for endoreduplication and is involved in cell expansion and cell proliferation. The hlq (harlequin) dwarf mutant has fewer root hair and leaf trichome. It has abnormal epidermal cell and accumulates callose.
AT2G37940	ERH1,IPCS2	Cell-Type Patterning	1.34899	1.11749	Ectopic root hairs	Inositol phosphorylceramide synthase 2;(source:Araport11)
AT5G02820	RHL2	Cell-Type Patterning	1.40254	1.10364	Reduced number of root hairs	Involved in the patterning and shape of leaf trichomes. Encodes the DNA topoisomerase VI SPO11-3, involved in endoreduplication
AT1G01380	ETC1	Cell-Type Patterning	1.43902	3.07317	None	ETC1 is involved in trichome and root hair patterning in Arabidopsis.
AT5G46700	TRN2, TET1	Cell-Type Patterning	1.49112	1.47929	Disorganized root cells	Encodes a transmembrane protein of the tetraspanin (TET) family, one of 17 members found in Arabidopsis. Double mutant analysis showed that TRN1 and TRN2 act in the same pathway. Required for the maintenance of both the radial pattern of tissue differentiation in the root and for the subsequent circumferential pattern within the epidermis.
AT5G14750	WER, MYB66	Cell-Type Patterning	1.7341	2.01156	Ectopic root hairs	Encodes a MyB-related protein containing R2 and R3 repeats, involved in root and hypocotyl epidermal cell fate determination. Loss of function mutations make extra root hairs. Nuclear localized protein is a positive regulator for expression of CAPRICE (CPC).
AT1G63650	EGL3	Cell-Type Patterning	1.9108	1.69484	None	Mutant has reduced trichomes, anthocyanin, and seed coat mucilage and abnormally patterned stomates. Mutants are defective in jasmonate-induced anthocyanin accumulation. Encodes a bHLH Transcription Factor 1. The protein is functionally redundant with GL3 and TT8 and interacts with TTG1, the myb proteins GL1, PAP1 and 2, CPC and TRY, and it will form heterodimers with GL3. Expression in N (non-ha…
AT1G10480	ZFP5	Hormone Action	0.46748	0.914634	Short hairs	Encodes a zinc finger protein containing only a single zinc finger that acts downstream of ZFP6 in regulating trichome development by integrating GA and cytokinin signaling.
AT5G03280	EIN2	Hormone Action	0.704233	0.73902	Short hairs	Involved in ethylene signal transduction. Acts downstream of CTR1. Positively regulates ORE1 and negatively regulates mir164A,B,C to regulate leaf senescence. A maternally expressed imprinted gene. Mutations in ein2 block ethylene stimulation of flavonol synthesis. The mRNA is cell-to-cell mobile.
AT2G38120	AUX1	Hormone Action	0.758539	1.04925	Short hairs, sometimes branched at base	Encodes an auxin influx transporter. AUX1 resides at the apical plasma membrane of protophloem cells and at highly dynamic subpopulations of Golgi apparatus and endosomes in all cell types. AUX1 action in the lateral root cap and/or epidermal cells influences lateral root initiation and positioning. Shoot supplied ammonium targets AUX1 and inhibits lateral root emergence. The mRNA is cell-to-cell…
AT3G23050	AXR2,IAA7	Hormone Action	0.788635	0.958604	Reduced number of root hairs, Site of hair formation closer to basal end of cell	Transcription regulator acting as repressor of auxin-inducible gene expression. Plays role in the control of gravitropic growth and development in light-grown seedlings. Auxin induces the degradation of the protein in a dosage-dependent manner in a process mediated by AtRac1. Auxin induced the relocalization of the protein within the nucleus from a diffused nucleoplasmic pattern to a discrete par…
AT3G51770	ETO1	Hormone Action	0.82709	0.828688	Long hairs, Site of hair formation closer to apical end of cell	Encodes a negative regulator of 1-aminocyclopropane-1-carboxylic acid synthase5(ACS5), which catalyze the rate-limiting step in ethylene biosynthesis. ETO1 directly interacts with ACS5 and inhibits its enzyme activity and targets it for degradation via proteasome-dependent pathway. It also interacts with CUL3 (a component of ubiquitin ligase complexes). eto1 (and eto3) mutations elevate ethylene …
AT1G66340	ETRí	Hormone Action	0.840541	0.857095	Short hairs, Site of hair formation closer to basal end of cell	Similar to prokaryote sensory transduction proteins. Contains a histidine kinase and a response regulator domain. Homodimer. Membrane component. Binds ethylene. Mutations affect ethylene binding and metabolism of other plant hormones such as auxin, cytokinins, ABA and gibberellic acid. Ethylene receptor. Has histidine kinase activity. Is regulated by RTE1. Mutations in ETR1 block ethylene stimula…
AT5G03730	CTR1	Hormone Action	1.07524	1.0011	Increase in ectopic root hairs	Homologous to the RAF family of serine/threonine protein kinases. Negative regulator in the ethylene signal transduction pathway. Interacts with the putative ethylene receptors ETR1 and ERS. Constitutively expressed.
AT1G33410	SAR1	Hormone Action	1.19238	0.885503	Hairs have swollen ends	Encodes a nucleoporin that regulates CONSTANS (CO) protein stability through affecting nuclear pore complex localization of an E3-ubiquitin ligase, HIGH EXPRESSION OF OSMOTICALLY RESPONSIVE GENES1 (HOS1), which destabilizes CO protein in the morning period.
AT2G34650	PID	Hormone Action	1.21144	1.32338	Reduced root hair growth	Encodes a protein serine/threonine kinase that may act as a positive regulator of cellular auxin efflux, as a a binary switch for PIN polarity, and as a negative regulator of auxin signaling. Recessive mutants exhibit similar phenotypes as pin-formed mutants in flowers and inflorescence but distinct phenotypes in cotyledons and leaves. Expressed in the vascular tissue proximal to root and shoot m…
AT1G05180	AXR1	Hormone Action	1.31098	1.17338	Short hairs, sometimes branched, Some hairs stop growing after swellings	Encodes a subunit of the RUB1 activating enzyme that regulates the protein degradation activity of Skp1-Cullin-Fbox complexes, primarily, but not exclusively, affecting auxin responses. Acts alongside AS1 to exclude BP expression from leaves. Promotes degradation of the cytokinin response repressor ARR5. Affects expression of key DNA repair and meiotic genes, signifcant role in DNA repair.
AT1G04250	AXR3	Hormone Action	1.42197	1.42967	Reduced number of root hairs	Transcription regulator acting as repressor of auxin-inducible gene expression. Auxin-inducible AUX/IAA gene. Short-lived nuclear protein with four conserved domains. Domain III has homology to beta alpha alpha dimerization and DNA binding domains. Involved in auxin signaling and is a positive modulator of natural leaf senescence. Auxin induces the degradation of the protein in a dosage-dependent…
AT1G27740	RSL4	Root Hair Morphogenesis	0	0.538462	Fewer and shorter root hairs	Basic helix-loop-helix (bHLH) transcription factor that is sufficient to promote postmitotic cell growth in root-hair cells. RSL4 is a direct transcriptional target of RHD6
AT1G62980	EXPA18	Root Hair Morphogenesis	0.0184109	0.425388	Abnormal hair growth	Alpha-expansin 18. Naming convention from the Expansin Working Group (Kende et al, 2004. Plant Mol Bio)
AT1G12040	LRX1	Root Hair Morphogenesis	0.026576	0.410383	Hairs short, swollen, or branched	encodes a a chimeric leucine-rich repeat/extensin protein that regulates root hair morphogenesis and elongation. Null mutants develop root hairs that frequently abort, swell, or branch. Gene is expressed in root hair cells and protein is specifically localized in the wall of the hair proper. The mRNA is cell-to-cell mobile.
AT1G12560	EXPA7, EXP7	Root Hair Morphogenesis	0.0363636	0.577033	Abnormal hair growth	Member of Alpha-Expansin Gene Family. Naming convention from the Expansin Working Group (Kende et al, 2004. Plant Mol Bio). Containing a conserved root hair-specific cis-element RHE. Expressed specifically in root hair cell and involved in root hair elongation.
[truncated: 44 more rows]

[truncated: 5 more sheets: S11. ZnF binding sites, S12. Oligonucleotides,  S13. ZFP7-selected genes, S14. ZFP7-induced genes, S15. ZFP7-repressed genes]
